# Supplementary material for: Revealing the Pharmacological Mechanism of Acorus tatarinowii in the Treatment of Ischemic Stroke Based on Network Pharmacology
Source: Evid Based Complement Alternat Med. 2020 Oct 31;2020:3236768. doi: 10.1155/2020/3236768 (PMC7648688; doi:10.1155/2020/3236768)
Supplement: Supplementary Materials — Table S1: compound targets for each component in AT by prediction. Table S2: IS-related targets in GeneCards and DisGeNET. Table S3: specific property of compounds contained in AT. [file 3236768.f1.zip]

Archive with 3 entries (3 files):
- Supplementary1.xlsx
- Supplementary2.xlsx
- Supplementary3.docx
