# Supplementary material for: Revealing the Pharmacological Mechanism of Acorus tatarinowii in the Treatment of Ischemic Stroke Based on Network Pharmacology
Source: Evid Based Complement Alternat Med. 2020 Oct 31;2020:3236768. doi: 10.1155/2020/3236768 (PMC7648688; doi:10.1155/2020/3236768)
Supplement: Supplementary Materials — Table S1: compound targets for each component in AT by prediction. Table S2: IS-related targets in GeneCards and DisGeNET. Table S3: specific property of compounds contained in AT. [file 3236768.f1.zip › Supplementary1.xlsx]

## Sheet: Sheet1
Table S1 Compound targets for each component in AT by prediction
NO.	MOLID	Gene name	Uniprot	Scores
1	AT-8	XPO1	O14980	1
2	AT-21	WEE1	P30291	1
3	AT-35	VEGFA	P15692	0.999999
4	AT-58	VDR	P11473	0.661806
5	AT-21	VCP	P55072	0.428281
6	AT-25	UTS2R	Q9UKP6	0.389993
7	AT-11	USP13	Q92995	0.372266
8	AT-11	USP10	Q14694	0.350647
9	AT-21	TYR	P14679	0.350647
10	AT-21	TYMS	P04818	0.350647
11	AT-27	TYMP	P19971	0.350647
12	AT-37	UGT2B7	P16662	0.350647
13	AT-8	TYK2	P29597	0.337919
14	AT-49	TUBB3	Q13509	0.329229
15	AT-10	TUBB1	Q9H4B7	0.320502
16	AT-35	TTR	P02766	0.312644
17	AT-53	TTL	Q8NG68	0.312644
18	AT-38	TTK	P33981	0.305318
19	AT-6	TSPO	P30536	0.303315
20	AT-55	TSHR	P16473	0.272563
21	AT-1	TRPV3	Q8NET8	0.259906
22	AT-31	TRPV1	Q8NER1	0.245006
23	AT-5	TRPM8	Q7Z2W7	0.23149
24	AT-48	TRPA1	O75762	0.225249
25	AT-56	TNNI3	P63316 P45379 P19429	0.221211
26	AT-56	TNNT2	P63316 P45379 P19429	0.221211
27	AT-56	TNNC1	P63316 P45379 P19429	0.221211
28	AT-21	TOP1	P11387	0.221211
29	AT-55	TNKS2	Q9H2K2	0.216433
30	AT-55	TNKS	O95271	0.216433
31	AT-16	TNK2	Q07912	0.197715
32	AT-10	TMIGD3	P0DMS9	0.197405
33	AT-16	TLR9	Q9NR96	0.197405
34	AT-38	TNF	P01375	0.197405
35	AT-35	TLR7	Q9NYK1	0.194839
36	AT-32	TLR4	O00206	0.190657
37	AT-12	THRB	P10828	0.187879
38	AT-21	THRA	P10827	0.185779
39	AT-31	TGM2	P21980	0.166714
40	AT-12	TGFBR1	P36897	0.164442
41	AT-21	TERT	O14746	0.158539
42	AT-16	TEK	Q02763	0.148751
43	AT-35	TDO2	P48775	0.148751
44	AT-4	TBXAS1	P24557	0.13988
45	AT-25	TAS2R31	P59538	0.13988
46	AT-47	TACR2	P21452	0.13988
47	AT-55	TBK1	Q9UHD2	0.13988
48	AT-55	TACR1	P25103	0.13988
49	AT-4	TAAR1	Q96RJ0	0.138495
50	AT-16	TAB1	Q15750	0.138495
51	AT-16	MAP3K7	O43318	0.138495
52	AT-21	SYK	P43405	0.138495
53	AT-10	STAT3	P40763	0.133391
54	AT-25	STK3	Q13188	0.133391
55	AT-25	SSTR3	P32745	0.133391
56	AT-29	SREBF2	Q12772	0.133316
57	AT-20	SRD5A2	P31213	0.132135
58	AT-20	SRD5A1	P18405	0.125143
59	AT-1	SQLE	Q14534	0.125076
60	AT-11	SRC	P12931	0.125076
61	AT-13	SOAT1	P35610	0.125076
62	AT-16	SOAT2	O75908	0.125076
63	AT-16	SLC9A1	P19634	0.125076
64	AT-16	SLC6A4	P31645	0.125076
65	AT-25	SLC6A9	P48067	0.125076
66	AT-31	SPHK2	Q9NRA0	0.125076
67	AT-50	SMARCA4	P51532	0.125076
68	AT-55	SMO	Q99835	0.125076
69	AT-1	SLC6A3	Q01959	0.118883
70	AT-10	SLC6A2	P23975	0.118883
71	AT-12	SIRT2	Q8IXJ6	0.118883
72	AT-16	SLC5A2	P31639	0.118883
73	AT-21	SLC5A1	P13866	0.118883
74	AT-31	SLC27A4	Q6P1M0	0.118883
75	AT-39	SLC22A12	Q96S37	0.118883
76	AT-53	SLC10A2	Q12908	0.118883
77	AT-55	SLC6A15	Q9H2J7	0.118883
78	AT-1	SIGMAR1	Q99720	0.116965
79	AT-5	SHH	Q15465	0.116739
80	AT-1	SCN9A	Q15858	0.115737
81	AT-1	SCN5A	Q14524	0.115737
82	AT-2	SHBG	P04278	0.115737
83	AT-3	SERPINA6	P08185	0.115737
84	AT-21	SERPINE1	P05121	0.115737
85	AT-29	SCD	O00767	0.115737
86	AT-23	SAE1	Q9UBE0	0.115731
87	AT-23	UBA2	Q9UBT2	0.115731
88	AT-31	S1PR3	Q99500	0.115731
89	AT-4	PTPN1	P18031	0.113286
90	AT-8	RGS4	P49798	0.113286
91	AT-10	RELA	Q04206	0.113286
92	AT-10	QPCT	Q16769	0.113286
93	AT-11	RPS6KB1	P23443	0.113286
94	AT-20	RORA	P35398	0.113286
95	AT-20	PTPN6	P29350	0.113286
96	AT-20	PTPN2	P17706	0.113286
97	AT-20	PTPN11	Q06124	0.113286
98	AT-21	ROCK2	O75116	0.113286
99	AT-21	RAF1	P04049	0.113286
100	AT-21	RAC1	P63000	0.113286
101	AT-25	RASGRP1	O95267	0.113286
102	AT-25	PYGL	P06737	0.113286
103	AT-27	PTK2B	Q14289	0.113286
104	AT-29	RORC	P51449	0.113286
105	AT-29	PTPRF	P10586	0.113286
106	AT-31	S1PR1	P21453	0.113286
107	AT-34	PTPN22	Q9Y2R2	0.113286
108	AT-39	RPS6KA2	Q15349	0.113286
109	AT-39	RIPK2	O43353	0.113286
110	AT-42	RXRG	P48443	0.113286
111	AT-42	RXRB	P28702	0.113286
112	AT-42	RXRA	P19793	0.113286
113	AT-55	RPS6KA3	P51812	0.113286
114	AT-1	PTGS2	P35354	0.113286
115	AT-1	PTAFR	P25105	0.113286
116	AT-8	PTGS1	P23219	0.113286
117	AT-10	PRKCA	P17252	0.113286
118	AT-16	PTGER4	P35408	0.113286
119	AT-16	PTGER3	P43115	0.113286
120	AT-16	PTGER2	P43116	0.113286
121	AT-16	PTGER1	P34995	0.113286
122	AT-19	PSEN2	P49810	0.113286
123	AT-19	PSENEN	Q9NZ42	0.113286
124	AT-19	NCSTN	Q92542	0.113286
125	AT-19	APH1A	Q96BI3	0.113286
126	AT-19	PSEN1	P49768	0.113286
127	AT-19	APH1B	Q8WW43	0.113286
128	AT-20	PTGES	O14684	0.113286
129	AT-20	PRKCH	P24723	0.113286
130	AT-21	PRKCZ	Q05513	0.113286
131	AT-25	PRMT3	O60678	0.113286
132	AT-25	PRKCD	Q05655	0.113286
133	AT-25	PPARG	P37231	0.113286
134	AT-29	PPARD	Q03181	0.113286
135	AT-31	PTGDR2	Q9Y5Y4	0.113286
136	AT-32	PRKDC	P78527	0.113286
137	AT-35	PSMB5	P28074	0.113286
138	AT-39	PREP	P48147	0.113286
139	AT-47	PRSS1	P07477	0.113286
140	AT-50	PPIA	P62937	0.113286
141	AT-53	PRCP	P42785	0.113286
142	AT-55	PPP1CA	P62136	0.113286
143	AT-55	PIK3R1	P16234	0.113286
144	AT-2	PPARA	Q07869	0.108771
145	AT-59	MMP2	P08253	0.106543
146	AT-59	MPI	P34949	0.106543
147	AT-59	AKT1	P31749	0.106543
148	AT-1	PGR	P06401	0.106166
149	AT-3	POLB	P06746	0.106166
150	AT-4	POLA1	P09884	0.106166
151	AT-6	PLK1	P53350	0.106166
152	AT-8	PIK3CB	P42338	0.106166
153	AT-8	PIK3CA	P42336	0.106166
154	AT-12	PIM2	Q9P1W9	0.106166
155	AT-12	PIM1	P11309	0.106166
156	AT-16	PLA2G7	Q13093	0.106166
157	AT-16	PGGT1B	P53609 P49354	0.106166
158	AT-16	PDPK1	O15530	0.106166
159	AT-16	PDGFRB	P09619	0.106166
160	AT-21	PFKFB3	Q16875	0.106166
161	AT-21	PDK1	Q15118	0.106166
162	AT-25	PIM3	Q86V86	0.106166
163	AT-25	PIK3CG	P48736	0.106166
164	AT-25	PIK3CD	O00329	0.106166
165	AT-25	PER2	O15055	0.106166
166	AT-29	PLA2G1B	P04054	0.106166
167	AT-31	PLA2G4C	Q9UP65	0.106166
168	AT-31	PLA2G4B	P0C869	0.106166
169	AT-31	PLA2G4A	P47712	0.106166
170	AT-31	PLA2G2A	P14555	0.106166
171	AT-34	PLEC	Q15149	0.106166
172	AT-34	PLAA	Q9Y263	0.106166
173	AT-39	PLK3	Q9H4B4	0.106166
174	AT-39	PI4KB	Q9UBF8	0.106166
175	AT-47	PLA2G6	O60733	0.106166
176	AT-55	PDGFRA	P09619	0.106166
177	AT-56	PLAT	P00750	0.106166
178	AT-19	PDE9A	O76083	0.103762
179	AT-8	PDE7A	Q13946	0.101229
180	AT-1	PARP1	P09874	0.100579
181	AT-4	PABPC1	P11940	0.100579
182	AT-6	P2RX7	Q99572	0.100579
183	AT-8	PDE10A	Q9Y233	0.100579
184	AT-12	PDE4D	Q08499	0.100579
185	AT-12	PDE4B	Q07343	0.100579
186	AT-12	PDE2A	O00408	0.100579
187	AT-12	PARP2	Q9UGN5	0.100579
188	AT-19	PDE5A	O76074	0.100579
189	AT-25	PDCD4	Q53EL6	0.100579
190	AT-31	PDE4C	Q08493	0.100579
191	AT-31	PDE4A	P27815	0.100579
192	AT-50	PBRM1	Q86U86	0.100579
193	AT-55	PDE3B	Q13370	0.100579
194	AT-55	PDE3A	Q14432	0.100579
195	AT-55	PDE1C	Q14123	0.100579
196	AT-55	PDE1A	P54750	0.100579
197	AT-55	PDE11A	Q9HCR9	0.100579
198	AT-53	OXTR	P30559	0.098163
199	AT-1	OPRM1	P35372	0.095126
200	AT-1	OPRK1	P41145	0.095126
201	AT-1	OPRD1	P41143	0.095126
202	AT-21	ODC1	P11926	0.095126
203	AT-53	OPRL1	P41146	0.095126
204	AT-11	NUDT1	P36639	0.091839
205	AT-1	NR3C2	P08235	0.08937
206	AT-1	NR3C1	P04150	0.08937
207	AT-3	NR1I3	Q14994	0.084997
208	AT-20	NR1I2	O75469	0.080792
209	AT-3	NR1H4	Q96RI1	0.08057
210	AT-5	NR1H3	Q13133	0.08057
211	AT-42	NR1H2	P55055	0.08057
212	AT-8	NQO2	P16083	0.077758
213	AT-8	NQO1	P15559	0.072716
214	AT-3	NPC1L1	Q9UHC9	0.071787
215	AT-6	MTNR1B	P49286	0.071787
216	AT-6	MTNR1A	P48039	0.071787
217	AT-6	MPO	P05164	0.071787
218	AT-8	NOS3	P29474	0.071787
219	AT-8	NOS1	P29475	0.071787
220	AT-8	MIF	P14174	0.071787
221	AT-8	MGLL	Q99685	0.071787
222	AT-10	NFE2L2	Q16236	0.071787
223	AT-10	MKNK1	Q9BUB5	0.071787
224	AT-11	MST1R	Q04912	0.071787
225	AT-12	NOS2	P35228	0.071787
226	AT-13	MMP8	P22894	0.071787
227	AT-13	MMP13	P45452	0.071787
228	AT-16	MTOR	P42345	0.071787
229	AT-16	MCL1	Q07820	0.071787
230	AT-19	NAMPT	P43490	0.071787
231	AT-19	MET	P08581	0.071787
232	AT-21	NOX4	Q9NPH5	0.071787
233	AT-21	MMP9	P14780	0.071787
234	AT-21	MMP3	P08254	0.071787
235	AT-21	MMP1	P03956	0.071787
236	AT-25	NPY5R	Q15761	0.071787
237	AT-31	NAAA	Q02083	0.071787
238	AT-34	NAT1	P18440	0.071787
240	AT-35	METAP2	P50579	0.071787
241	AT-39	NOTUM	Q6P988	0.071787
242	AT-50	MLYCD	O95822	0.071787
243	AT-53	NPY2R	P49146	0.071787
244	AT-53	MDM2	Q00987	0.071787
245	AT-6	MC4R	P32245	0.071716
246	AT-11	MCHR1	Q99705	0.071716
247	AT-34	MB	P02144	0.071716
248	AT-1	MAPK8	P45983	0.069097
249	AT-10	MAPT	P10636	0.069097
250	AT-11	MAPK10	P53779	0.069097
251	AT-12	MAPK14	Q16539	0.069097
252	AT-12	MAP3K14	Q99558	0.069097
253	AT-16	MAPK9	P45984	0.069097
254	AT-16	MAP2K1	Q02750	0.069097
255	AT-20	MAPK3	P27361	0.069097
256	AT-25	MAPK11	Q15759	0.069097
257	AT-25	MAPK1	P28482	0.069097
258	AT-25	MAP3K5	Q99683	0.069097
259	AT-53	MAP3K11	Q16584	0.069097
260	AT-10	MAOB	P27338	0.066975
261	AT-10	MAOA	P21397	0.062622
262	AT-16	LYPLA2	O95372	0.061947
263	AT-32	MALT1	Q9UDY8	0.061947
264	AT-16	GABRB3	P28472	0.060425
265	AT-16	GABRG2	P18507	0.060425
266	AT-16	GABRA1	P14867	0.060425
267	AT-16	GABRA3	P34903	0.060425
268	AT-19	GABRA5	P31644	0.060425
269	AT-19	GABRA2	P47869	0.060425
270	AT-48	GABRB2	P18507	0.060425
271	AT-55	FNTA	P49354 P49356	0.060425
272	AT-55	FNTB	P49354 P49356	0.060425
273	AT-1	LTA4H	P09960	0.060425
274	AT-1	LRRK2	Q5S007	0.060425
275	AT-1	KCNA5	P22460	0.060425
276	AT-1	JAK2	O60674	0.060425
277	AT-1	JAK1	P23458	0.060425
278	AT-1	IDO1	P14902	0.060425
279	AT-1	HSD17B2	P37059	0.060425
280	AT-1	HRH4	Q9H3N8	0.060425
281	AT-1	HRH3	Q9Y5N1	0.060425
282	AT-1	HMOX1	P09601	0.060425
283	AT-3	GPBAR1	Q8TDU6	0.060425
284	AT-3	GABBR1	Q9UBS5	0.060425
285	AT-3	G6PD	P11413	0.060425
286	AT-4	LIPE	Q05469	0.060425
287	AT-4	HSD11B1	P28845	0.060425
288	AT-4	HMGCR	P04035	0.060425
289	AT-5	ESR2	Q92731	0.060425
290	AT-6	GRM5	P41594	0.060425
291	AT-6	FKBP1A	P62942	0.060425
292	AT-8	KAT2B	Q92831	0.060425
293	AT-8	GRM4	Q14833	0.060425
294	AT-8	GRM2	Q14416	0.060425
295	AT-8	GALR3	O60755	0.060425
296	AT-10	LCK	P06239	0.060425
297	AT-10	HTT	P42858	0.060425
298	AT-11	KDR	P35968	0.060425
299	AT-11	JUN	P05412	0.060425
300	AT-11	HTR2A	P28223	0.060425
301	AT-11	HSD17B3	P37058	0.060425
302	AT-11	HDAC3	O15379	0.060425
303	AT-11	HDAC2	Q92769	0.060425
304	AT-11	HDAC1	Q13547	0.060425
305	AT-11	GCK	P35557	0.060425
306	AT-12	HTR6	P50406	0.060425
307	AT-12	FADS1	O60427	0.060425
308	AT-13	HTR2C	P28335	0.060425
309	AT-13	HRH2	P25021	0.060425
310	AT-13	HDAC8	Q9BY41	0.060425
311	AT-16	LYPLA1	O75608	0.060425
312	AT-16	LIMK1	P53667	0.060425
313	AT-16	IKBKE	Q14164	0.060425
314	AT-16	HSP90AA1	P07900	0.060425
315	AT-16	HIF1A	Q16665	0.060425
316	AT-16	HCRTR2	O43614	0.060425
317	AT-16	HCRTR1	O43613	0.060425
318	AT-16	GYS1	P13807	0.060425
319	AT-16	GSK3B	P49841	0.060425
320	AT-16	GHSR	Q92847	0.060425
321	AT-16	FASN	P49327	0.060425
322	AT-16	FAAH	O00519	0.060425
323	AT-17	HCAR2	Q8TDS4	0.060425
324	AT-18	ICMT	O60725	0.060425
325	AT-19	KDM4C	Q9H3R0	0.060425
326	AT-20	HSD11B2	P80365	0.060425
327	AT-20	GLI2	P10070	0.060425
328	AT-20	GLI1	P08151	0.060425
329	AT-20	FABP1	P07148	0.060425
330	AT-21	KIF11	P52732	0.060425
331	AT-21	KCNA3	P22001	0.060425
332	AT-21	INSR	P06213	0.060425
333	AT-21	HTR1A	P08908	0.060425
334	AT-21	HSD17B14	Q9BPX1	0.060425
335	AT-21	HSD17B1	P14061	0.060425
336	AT-21	HPGDS	O60760	0.060425
337	AT-21	HDAC9	Q9UKV0	0.060425
338	AT-21	HDAC7	Q8WUI4	0.060425
339	AT-21	HDAC6	Q9UBN7	0.060425
340	AT-21	HDAC5	Q9UQL6	0.060425
341	AT-21	GRK2	P25098	0.060425
342	AT-21	FLT3	P36888	0.060425
343	AT-21	F3	P13726	0.060425
344	AT-21	ESRRB	O95718	0.060425
345	AT-24	FDFT1	P37268	0.060425
346	AT-25	LIPA	P38571	0.060425
347	AT-25	KCNE1	P15382	0.060425
348	AT-25	KCNQ1	P51787	0.060425
349	AT-25	JAK3	P52333	0.060425
350	AT-25	IL6ST	P40189	0.060425
351	AT-25	IL1B	P01584	0.060425
352	AT-25	HTR7	P34969	0.060425
353	AT-25	GCGR	P47871	0.060425
354	AT-25	FGFR1	P11362	0.060425
355	AT-25	F2RL3	Q96RI0	0.060425
356	AT-27	KDM5C	P41229	0.060425
357	AT-27	KDM5B	Q9UGL1	0.060425
358	AT-27	KDM4B	O94953	0.060425
359	AT-27	KDM4A	O75164	0.060425
360	AT-29	FABP5	Q01469	0.060425
361	AT-29	FABP4	P15090	0.060425
362	AT-29	FABP3	P05413	0.060425
363	AT-30	LSS	P48449	0.060425
364	AT-31	KCNH2	Q12809	0.060425
365	AT-31	ITK	Q08881	0.060425
366	AT-31	IGF1R	P08069	0.060425
367	AT-31	HRH1	P35367	0.060425
368	AT-31	GRM1	Q13255	0.060425
369	AT-31	FLT4	P35916	0.060425
370	AT-31	FFAR1	O14842	0.060425
371	AT-34	KCNMA1	Q12791	0.060425
372	AT-35	GPR84	Q9NQS5	0.060425
373	AT-38	KCNJ11	Q14654	0.060425
374	AT-38	ABCC9	O60706	0.060425
375	AT-38	ITGAL	P20701	0.060425
376	AT-38	IL6	P05231	0.060425
377	AT-38	GLUL	P15104	0.060425
378	AT-39	KCNN3	Q9UGI6	0.060425
379	AT-39	KCNN2	Q9H2S1	0.060425
380	AT-39	KCNN1	Q92952	0.060425
381	AT-39	HIPK2	Q9H2X6	0.060425
382	AT-39	HCK	P08631	0.060425
383	AT-39	GUSB	P08236	0.060425
384	AT-39	GPR139	Q6DWJ6	0.060425
385	AT-39	GAPDH	P04406	0.060425
386	AT-39	FAP	Q12884	0.060425
387	AT-47	F2	P00734	0.060425
388	AT-48	HTR2B	P41595	0.060425
389	AT-48	ESRRG	P62508	0.060425
390	AT-50	IMPDH2	P12268	0.060425
391	AT-53	KIT	P10721	0.060425
392	AT-53	GABBR2	O75899	0.060425
393	AT-53	F2R	P25116	0.060425
394	AT-55	LYN	P07948	0.060425
395	AT-55	HSP90B1	P14625	0.060425
396	AT-55	HSP90AB1	P08238	0.060425
397	AT-55	GRK5	P34947	0.060425
398	AT-58	GLRA1	P23415	0.060425
