# Supplementary material for: Revealing the Pharmacological Mechanism of Acorus tatarinowii in the Treatment of Ischemic Stroke Based on Network Pharmacology
Source: Evid Based Complement Alternat Med. 2020 Oct 31;2020:3236768. doi: 10.1155/2020/3236768 (PMC7648688; doi:10.1155/2020/3236768)
Supplement: Supplementary Materials — Table S1: compound targets for each component in AT by prediction. Table S2: IS-related targets in GeneCards and DisGeNET. Table S3: specific property of compounds contained in AT. [file 3236768.f1.zip › Supplementary2.xlsx]

## Sheet: genecards
Table S2-1 IS related targets in Genecards
Keywords	Gene Symbol	Description	Category	Gifts	GC Id	Relevance score
Ischemic Stroke	MTHFR	Methylenetetrahydrofolate Reductase	Protein Coding	48	GC01M011785	81.66
Ischemic Stroke	F2	Coagulation Factor II, Thrombin	Protein Coding	50	GC11P046720	80.74
Ischemic Stroke	F5	Coagulation Factor V	Protein Coding	46	GC01M169511	77.16
Ischemic Stroke	ACE	Angiotensin I Converting Enzyme	Protein Coding	51	GC17P063477	75.63
Ischemic Stroke	NOS3	Nitric Oxide Synthase 3	Protein Coding	52	GC07P150990	66.78
Ischemic Stroke	NOTCH3	Notch Receptor 3	Protein Coding	50	GC19M015159	63.79
Ischemic Stroke	IL6	Interleukin 6	Protein Coding	51	GC07P022765	60.81
Ischemic Stroke	GP1BA	Glycoprotein Ib Platelet Subunit Alpha	Protein Coding	47	GC17P004932	55.68
Ischemic Stroke	AGTR1	Angiotensin II Receptor Type 1	Protein Coding	51	GC03P148697	52.76
Ischemic Stroke	AGT	Angiotensinogen	Protein Coding	51	GC01M230702	50.97
Ischemic Stroke	PON1	Paraoxonase 1	Protein Coding	47	GC07M095297	50.07
Ischemic Stroke	ENG	Endoglin	Protein Coding	48	GC09M127815	48.98
Ischemic Stroke	CST3	Cystatin C	Protein Coding	45	GC20M023608	48.77
Ischemic Stroke	ALOX5AP	Arachidonate 5-Lipoxygenase Activating Protein	Protein Coding	45	GC13P030713	48.72
Ischemic Stroke	NPPA	Natriuretic Peptide A	Protein Coding	48	GC01M011846	47.56
Ischemic Stroke	MAPT	Microtubule Associated Protein Tau	Protein Coding	52	GC17P045894	46.95
Ischemic Stroke	CRP	C-Reactive Protein	Protein Coding	48	GC01M159715	46.46
Ischemic Stroke	TNF	Tumor Necrosis Factor	Protein Coding	53	GC06P033397	44.85
Ischemic Stroke	FBN1	Fibrillin 1	Protein Coding	47	GC15M048408	44.71
Ischemic Stroke	GLA	Galactosidase Alpha	Protein Coding	50	GC0XM101397	44.21
Ischemic Stroke	TLR4	Toll Like Receptor 4	Protein Coding	52	GC09P117704	44.14
Ischemic Stroke	LDLR	Low Density Lipoprotein Receptor	Protein Coding	50	GC19P011061	43.64
Ischemic Stroke	PRKCH	Protein Kinase C Eta	Protein Coding	52	GC14P061187	43.06
Ischemic Stroke	MT-TL1	Mitochondrially Encoded TRNA-Leu (UUA/G) 1	RNA Gene	16	GCMTP003232	42.51
Ischemic Stroke	APOE	Apolipoprotein E	Protein Coding	52	GC19P044906	40.31
Ischemic Stroke	ADAMTS13	ADAM Metallopeptidase With Thrombospondin Type 1 Motif 13	Protein Coding	47	GC09P133414	40.29
Ischemic Stroke	PON2	Paraoxonase 2	Protein Coding	44	GC07M095404	38.88
Ischemic Stroke	TH	Tyrosine Hydroxylase	Protein Coding	53	GC11M002163	38.79
Ischemic Stroke	EDNRA	Endothelin Receptor Type A	Protein Coding	50	GC04P147480	38.63
Ischemic Stroke	GNB3	G Protein Subunit Beta 3	Protein Coding	48	GC12P006839	38.15
Ischemic Stroke	VKORC1	Vitamin K Epoxide Reductase Complex Subunit 1	Protein Coding	48	GC16M031105	38.04
Ischemic Stroke	PLAT	Plasminogen Activator, Tissue Type	Protein Coding	51	GC08M042174	37.74
Ischemic Stroke	PROZ	Protein Z, Vitamin K Dependent Plasma Glycoprotein	Protein Coding	41	GC13P113158	37.19
Ischemic Stroke	PSEN1	Presenilin 1	Protein Coding	53	GC14P073136	36.72
Ischemic Stroke	SELP	Selectin P	Protein Coding	47	GC01M169558	36.15
Ischemic Stroke	EPOR	Erythropoietin Receptor	Protein Coding	51	GC19M011377	35.97
Ischemic Stroke	APP	Amyloid Beta Precursor Protein	Protein Coding	52	GC21M025880	35.87
Ischemic Stroke	COL4A1	Collagen Type IV Alpha 1 Chain	Protein Coding	49	GC13M110148	35.64
Ischemic Stroke	PTGIS	Prostaglandin I2 Synthase	Protein Coding	48	GC20M049503	35.63
Ischemic Stroke	TNFRSF1A	TNF Receptor Superfamily Member 1A	Protein Coding	51	GC12M006328	35.53
Ischemic Stroke	SERPINE1	Serpin Family E Member 1	Protein Coding	52	GC07P101127	35.36
Ischemic Stroke	MMP9	Matrix Metallopeptidase 9	Protein Coding	54	GC20P046008	35.25
Ischemic Stroke	PIK3CA	Phosphatidylinositol-4,5-Bisphosphate 3-Kinase Catalytic Subunit Alpha	Protein Coding	54	GC03P179148	34.55
Ischemic Stroke	VWF	Von Willebrand Factor	Protein Coding	50	GC12M005917	34.26
Ischemic Stroke	NPPB	Natriuretic Peptide B	Protein Coding	45	GC01M011858	34.25
Ischemic Stroke	SERPINC1	Serpin Family C Member 1	Protein Coding	49	GC01M174131	33.95
Ischemic Stroke	HTRA1	HtrA Serine Peptidase 1	Protein Coding	44	GC10P122461	33.23
Ischemic Stroke	PDE4D	Phosphodiesterase 4D	Protein Coding	50	GC05M058969	32.64
Ischemic Stroke	BDNF	Brain Derived Neurotrophic Factor	Protein Coding	48	GC11M027654	32.08
Ischemic Stroke	APOH	Apolipoprotein H	Protein Coding	45	GC17M066212	31.48
Ischemic Stroke	IL10	Interleukin 10	Protein Coding	49	GC01M206767	31.32
Ischemic Stroke	ACSL4	Acyl-CoA Synthetase Long Chain Family Member 4	Protein Coding	45	GC0XM109624	31.24
Ischemic Stroke	INS	Insulin	Protein Coding	50	GC11M002159	30.65
Ischemic Stroke	TREX1	Three Prime Repair Exonuclease 1	Protein Coding	44	GC03P048466	30.63
Ischemic Stroke	JAK2	Janus Kinase 2	Protein Coding	55	GC09P004985	30.55
Ischemic Stroke	TP53	Tumor Protein P53	Protein Coding	55	GC17M007661	29.77
Ischemic Stroke	ELN	Elastin	Protein Coding	45	GC07P074027	29.76
Ischemic Stroke	MT-ND4	Mitochondrially Encoded NADH:Ubiquinone Oxidoreductase Core Subunit 4	Protein Coding	33	GCMTP010762	29.48
Ischemic Stroke	ACTA2	Actin Alpha 2, Smooth Muscle	Protein Coding	49	GC10M088935	29.42
Ischemic Stroke	VEGFA	Vascular Endothelial Growth Factor A	Protein Coding	51	GC06P043770	29.37
Ischemic Stroke	F3	Coagulation Factor III, Tissue Factor	Protein Coding	47	GC01M094530	29.01
Ischemic Stroke	LPA	Lipoprotein(A)	Protein Coding	41	GC06M160531	28.69
Ischemic Stroke	APOB	Apolipoprotein B	Protein Coding	45	GC02M020956	27.82
Ischemic Stroke	ADA2	Adenosine Deaminase 2	Protein Coding	35	GC22M017179	27.69
Ischemic Stroke	ALB	Albumin	Protein Coding	51	GC04P073397	27.28
Ischemic Stroke	CASP3	Caspase 3	Protein Coding	52	GC04M184627	26.93
Ischemic Stroke	THBD	Thrombomodulin	Protein Coding	45	GC20M023026	26.75
Ischemic Stroke	FGA	Fibrinogen Alpha Chain	Protein Coding	48	GC04M154583	26.3
Ischemic Stroke	PLA2G7	Phospholipase A2 Group VII	Protein Coding	51	GC06M046704	26.3
Ischemic Stroke	TGFB2	Transforming Growth Factor Beta 2	Protein Coding	51	GC01P218345	25.95
Ischemic Stroke	REN	Renin	Protein Coding	50	GC01M204154	25.53
Ischemic Stroke	SOD2	Superoxide Dismutase 2	Protein Coding	52	GC06M159669	25.49
Ischemic Stroke	F7	Coagulation Factor VII	Protein Coding	48	GC13P113105	25.33
Ischemic Stroke	ENO2	Enolase 2	Protein Coding	49	GC12P006913	25.27
Ischemic Stroke	CXCL12	C-X-C Motif Chemokine Ligand 12	Protein Coding	47	GC10M044370	25.09
Ischemic Stroke	MYLK	Myosin Light Chain Kinase	Protein Coding	54	GC03M123610	24.59
Ischemic Stroke	TTR	Transthyretin	Protein Coding	51	GC18P031557	24.54
Ischemic Stroke	HMGCR	3-Hydroxy-3-Methylglutaryl-CoA Reductase	Protein Coding	47	GC05P075336	24.15
Ischemic Stroke	TGFBR2	Transforming Growth Factor Beta Receptor 2	Protein Coding	54	GC03P030623	23.99
Ischemic Stroke	IL1B	Interleukin 1 Beta	Protein Coding	50	GC02M112829	23.97
Ischemic Stroke	CDKN2B-AS1	CDKN2B Antisense RNA 1	RNA Gene	22	GC09P021994	23.68
Ischemic Stroke	NOS2	Nitric Oxide Synthase 2	Protein Coding	51	GC17M027756	23.66
Ischemic Stroke	ACVRL1	Activin A Receptor Like Type 1	Protein Coding	51	GC12P051906	23.64
Ischemic Stroke	ADM	Adrenomedullin	Protein Coding	45	GC11P010304	23.62
Ischemic Stroke	SOD1	Superoxide Dismutase 1	Protein Coding	54	GC21P031659	23.43
Ischemic Stroke	ALOX5	Arachidonate 5-Lipoxygenase	Protein Coding	50	GC10P045374	23.4
Ischemic Stroke	LMNA	Lamin A/C	Protein Coding	49	GC01P156082	23.31
Ischemic Stroke	EDN1	Endothelin 1	Protein Coding	48	GC06P012290	23.29
Ischemic Stroke	HSPA4	Heat Shock Protein Family A (Hsp70) Member 4	Protein Coding	43	GC05P133051	23.24
Ischemic Stroke	MYH11	Myosin Heavy Chain 11	Protein Coding	47	GC16M015704	23.24
Ischemic Stroke	OLR1	Oxidized Low Density Lipoprotein Receptor 1	Protein Coding	45	GC12M013371	23.2
Ischemic Stroke	PRKG1	Protein Kinase CGMP-Dependent 1	Protein Coding	52	GC10P050991	23.18
Ischemic Stroke	NOTCH1	Notch Receptor 1	Protein Coding	52	GC09M136582	23.06
Ischemic Stroke	F10	Coagulation Factor X	Protein Coding	49	GC13P113122	22.99
Ischemic Stroke	PF4	Platelet Factor 4	Protein Coding	43	GC04M073980	22.97
Ischemic Stroke	SERPINA3	Serpin Family A Member 3	Protein Coding	45	GC14P094612	22.54
Ischemic Stroke	PECAM1	Platelet And Endothelial Cell Adhesion Molecule 1	Protein Coding	41	GC17M064319	22.45
Ischemic Stroke	COG2	Component Of Oligomeric Golgi Complex 2	Protein Coding	41	GC01P230642	22.43
Ischemic Stroke	ABCA1	ATP Binding Cassette Subfamily A Member 1	Protein Coding	49	GC09M104781	22.42
Ischemic Stroke	F2R	Coagulation Factor II Thrombin Receptor	Protein Coding	48	GC05P076716	22.39
Ischemic Stroke	MT-TK	Mitochondrially Encoded TRNA-Lys (AAA/G)	RNA Gene	15	GCMTP008297	22.31
Ischemic Stroke	ANGPT1	Angiopoietin 1	Protein Coding	47	GC08M107246	22.19
Ischemic Stroke	CCL2	C-C Motif Chemokine Ligand 2	Protein Coding	50	GC17P034255	22.19
Ischemic Stroke	MAP2	Microtubule Associated Protein 2	Protein Coding	44	GC02P209424	22.18
Ischemic Stroke	ADORA1	Adenosine A1 Receptor	Protein Coding	48	GC01P203090	22.14
Ischemic Stroke	AVP	Arginine Vasopressin	Protein Coding	47	GC20M003082	22.14
Ischemic Stroke	PLG	Plasminogen	Protein Coding	49	GC06P160702	22.12
Ischemic Stroke	LOX	Lysyl Oxidase	Protein Coding	46	GC05M122063	22.12
Ischemic Stroke	ADRB2	Adrenoceptor Beta 2	Protein Coding	50	GC05P148825	22.1
Ischemic Stroke	SH2B3	SH2B Adaptor Protein 3	Protein Coding	47	GC12P111405	22.05
Ischemic Stroke	PPBP	Pro-Platelet Basic Protein	Protein Coding	45	GC04M073986	22
Ischemic Stroke	MT-ND1	Mitochondrially Encoded NADH:Ubiquinone Oxidoreductase Core Subunit 1	Protein Coding	34	GCMTP003309	21.97
Ischemic Stroke	CREB1	CAMP Responsive Element Binding Protein 1	Protein Coding	50	GC02P207529	21.94
Ischemic Stroke	RETN	Resistin	Protein Coding	45	GC19P007669	21.92
Ischemic Stroke	GUCY1A1	Guanylate Cyclase 1 Soluble Subunit Alpha 1	Protein Coding	37	GC04P155667	21.87
Ischemic Stroke	MBP	Myelin Basic Protein	Protein Coding	45	GC18M076978	21.8
Ischemic Stroke	P2RY12	Purinergic Receptor P2Y12	Protein Coding	49	GC03M151336	21.66
Ischemic Stroke	HMGB1	High Mobility Group Box 1	Protein Coding	45	GC13M030456	21.62
Ischemic Stroke	SELE	Selectin E	Protein Coding	45	GC01M169722	21.46
Ischemic Stroke	ACE2	Angiotensin I Converting Enzyme 2	Protein Coding	50	GC0XM015494	21.46
Ischemic Stroke	MB	Myoglobin	Protein Coding	45	GC22M035606	21.42
Ischemic Stroke	SMAD3	SMAD Family Member 3	Protein Coding	50	GC15P067063	21.3
Ischemic Stroke	PPARG	Peroxisome Proliferator Activated Receptor Gamma	Protein Coding	54	GC03P012287	21.25
Ischemic Stroke	MIR126	MicroRNA 126	RNA Gene	23	GC09P136670	21.12
Ischemic Stroke	SLC1A2	Solute Carrier Family 1 Member 2	Protein Coding	50	GC11M035272	21.09
Ischemic Stroke	AQP4	Aquaporin 4	Protein Coding	45	GC18M026852	21.07
Ischemic Stroke	ADIPOQ	Adiponectin, C1Q And Collagen Domain Containing	Protein Coding	47	GC03P186842	21.06
Ischemic Stroke	PROCR	Protein C Receptor	Protein Coding	44	GC20P035171	21.05
Ischemic Stroke	PIK3C2A	Phosphatidylinositol-4-Phosphate 3-Kinase Catalytic Subunit Type 2 Alpha	Protein Coding	47	GC11M017165	20.95
Ischemic Stroke	HTR2A	5-Hydroxytryptamine Receptor 2A	Protein Coding	49	GC13M046831	20.82
Ischemic Stroke	CASP1	Caspase 1	Protein Coding	51	GC11M105025	20.8
Ischemic Stroke	SELL	Selectin L	Protein Coding	44	GC01M169690	20.77
Ischemic Stroke	RNF213	Ring Finger Protein 213	Protein Coding	40	GC17P080260	20.76
Ischemic Stroke	ESR1	Estrogen Receptor 1	Protein Coding	55	GC06P151656	20.72
Ischemic Stroke	AKT1	AKT Serine/Threonine Kinase 1	Protein Coding	56	GC14M104769	20.7
Ischemic Stroke	SULT1A3	Sulfotransferase Family 1A Member 3	Protein Coding	39	GC16P030199	20.65
Ischemic Stroke	SPP1	Secreted Phosphoprotein 1	Protein Coding	48	GC04P087975	20.64
Ischemic Stroke	CYCS	Cytochrome C, Somatic	Protein Coding	50	GC07M025118	20.63
Ischemic Stroke	CNR1	Cannabinoid Receptor 1	Protein Coding	48	GC06M088139	20.52
Ischemic Stroke	MT-CYB	Mitochondrially Encoded Cytochrome B	Protein Coding	32	GCMTP014749	20.47
Ischemic Stroke	MT-ND6	Mitochondrially Encoded NADH:Ubiquinone Oxidoreductase Core Subunit 6	Protein Coding	33	GCMTM014151	20.44
Ischemic Stroke	EDNRB	Endothelin Receptor Type B	Protein Coding	50	GC13M077895	20.39
Ischemic Stroke	NES	Nestin	Protein Coding	41	GC01M156668	20.36
Ischemic Stroke	MROS	Melkersson-Rosenthal Syndrome	Genetic Locus	4	GC09U990083	20.36
Ischemic Stroke	ICAM1	Intercellular Adhesion Molecule 1	Protein Coding	52	GC19P010270	20.34
Ischemic Stroke	AIF1	Allograft Inflammatory Factor 1	Protein Coding	41	GC06P033396	20.33
Ischemic Stroke	MT-ND5	Mitochondrially Encoded NADH:Ubiquinone Oxidoreductase Core Subunit 5	Protein Coding	33	GCMTP012339	20.3
Ischemic Stroke	KCNQ1	Potassium Voltage-Gated Channel Subfamily Q Member 1	Protein Coding	51	GC11P002444	20.26
Ischemic Stroke	GDNF	Glial Cell Derived Neurotrophic Factor	Protein Coding	49	GC05M037812	20.18
Ischemic Stroke	CXCR4	C-X-C Motif Chemokine Receptor 4	Protein Coding	54	GC02M136114	20.17
Ischemic Stroke	CD40LG	CD40 Ligand	Protein Coding	49	GC0XP136649	20.07
Ischemic Stroke	NGB	Neuroglobin	Protein Coding	39	GC14M077265	20.02
Ischemic Stroke	GJA1	Gap Junction Protein Alpha 1	Protein Coding	52	GC06P121436	19.99
Ischemic Stroke	SERPINI1	Serpin Family I Member 1	Protein Coding	47	GC03P167735	19.97
Ischemic Stroke	GP6	Glycoprotein VI Platelet	Protein Coding	45	GC19M055013	19.94
Ischemic Stroke	MIR21	MicroRNA 21	RNA Gene	24	GC17P059841	19.91
Ischemic Stroke	TBXA2R	Thromboxane A2 Receptor	Protein Coding	49	GC19M003594	19.81
Ischemic Stroke	HBA1	Hemoglobin Subunit Alpha 1	Protein Coding	43	GC16P001212	19.8
Ischemic Stroke	ANXA5	Annexin A5	Protein Coding	48	GC04M121667	19.77
Ischemic Stroke	APOA1	Apolipoprotein A1	Protein Coding	50	GC11M116835	19.75
Ischemic Stroke	COL4A2	Collagen Type IV Alpha 2 Chain	Protein Coding	45	GC13P110305	19.74
Ischemic Stroke	TSPO	Translocator Protein	Protein Coding	44	GC22P043151	19.72
Ischemic Stroke	FABP3	Fatty Acid Binding Protein 3	Protein Coding	45	GC01M031365	19.71
Ischemic Stroke	SRC	SRC Proto-Oncogene, Non-Receptor Tyrosine Kinase	Protein Coding	53	GC20P037344	19.7
Ischemic Stroke	MALAT1	Metastasis Associated Lung Adenocarcinoma Transcript 1	RNA Gene	25	GC11P065621	19.64
Ischemic Stroke	SLC6A4	Solute Carrier Family 6 Member 4	Protein Coding	49	GC17M030194	19.48
Ischemic Stroke	ADORA2A	Adenosine A2a Receptor	Protein Coding	46	GC22P024417	19.46
Ischemic Stroke	BMP7	Bone Morphogenetic Protein 7	Protein Coding	46	GC20M057168	19.44
Ischemic Stroke	SIRT1	Sirtuin 1	Protein Coding	51	GC10P067884	19.38
Ischemic Stroke	AOC3	Amine Oxidase Copper Containing 3	Protein Coding	45	GC17P042851	19.38
Ischemic Stroke	GATA4	GATA Binding Protein 4	Protein Coding	50	GC08P011676	19.25
Ischemic Stroke	COL3A1	Collagen Type III Alpha 1 Chain	Protein Coding	48	GC02P188974	19.19
Ischemic Stroke	SERPINF2	Serpin Family F Member 2	Protein Coding	45	GC17P001742	19.07
Ischemic Stroke	APOC3	Apolipoprotein C3	Protein Coding	44	GC11P116829	19.05
Ischemic Stroke	TNNT2	Troponin T2, Cardiac Type	Protein Coding	49	GC01M201359	19.05
Ischemic Stroke	ATP1A2	ATPase Na+/K+ Transporting Subunit Alpha 2	Protein Coding	49	GC01P160085	19.04
Ischemic Stroke	ITGB3	Integrin Subunit Beta 3	Protein Coding	51	GC17P047254	19
Ischemic Stroke	POMC	Proopiomelanocortin	Protein Coding	50	GC02M025160	18.98
Ischemic Stroke	ENTPD1	Ectonucleoside Triphosphate Diphosphohydrolase 1	Protein Coding	48	GC10P095711	18.96
Ischemic Stroke	AGTR2	Angiotensin II Receptor Type 2	Protein Coding	44	GC0XP116170	18.89
Ischemic Stroke	MAPK3	Mitogen-Activated Protein Kinase 3	Protein Coding	51	GC16M030117	18.86
Ischemic Stroke	CALR	Calreticulin	Protein Coding	52	GC19P012938	18.81
Ischemic Stroke	MT-CO1	Mitochondrially Encoded Cytochrome C Oxidase I	Protein Coding	35	GCMTP005906	18.72
Ischemic Stroke	IGF1	Insulin Like Growth Factor 1	Protein Coding	50	GC12M102395	18.72
Ischemic Stroke	TGFBR1	Transforming Growth Factor Beta Receptor 1	Protein Coding	54	GC09P099104	18.61
Ischemic Stroke	FGB	Fibrinogen Beta Chain	Protein Coding	47	GC04P154564	18.59
Ischemic Stroke	PRNP	Prion Protein	Protein Coding	48	GC20P004686	18.57
Ischemic Stroke	ARSA	Arylsulfatase A	Protein Coding	48	GC22M050622	18.5
Ischemic Stroke	ADORA3	Adenosine A3 Receptor	Protein Coding	47	GC01M111499	18.42
Ischemic Stroke	POLG	DNA Polymerase Gamma, Catalytic Subunit	Protein Coding	47	GC15M089316	18.36
Ischemic Stroke	DCX	Doublecortin	Protein Coding	46	GC0XM111293	18.22
Ischemic Stroke	CXCL8	C-X-C Motif Chemokine Ligand 8	Protein Coding	43	GC04P073740	18.21
Ischemic Stroke	BACE1	Beta-Secretase 1	Protein Coding	48	GC11M117285	18.18
Ischemic Stroke	NFE2L2	Nuclear Factor, Erythroid 2 Like 2	Protein Coding	49	GC02M177227	18.14
Ischemic Stroke	TNFRSF12A	TNF Receptor Superfamily Member 12A	Protein Coding	45	GC16P003018	18.08
Ischemic Stroke	PTGS2	Prostaglandin-Endoperoxide Synthase 2	Protein Coding	50	GC01M186640	17.88
Ischemic Stroke	KNG1	Kininogen 1	Protein Coding	45	GC03P186717	17.82
Ischemic Stroke	VCAM1	Vascular Cell Adhesion Molecule 1	Protein Coding	47	GC01P100719	17.75
Ischemic Stroke	CYP11B2	Cytochrome P450 Family 11 Subfamily B Member 2	Protein Coding	47	GC08M142910	17.75
Ischemic Stroke	F9	Coagulation Factor IX	Protein Coding	47	GC0XP139530	17.65
Ischemic Stroke	NR3C1	Nuclear Receptor Subfamily 3 Group C Member 1	Protein Coding	51	GC05M143277	17.61
Ischemic Stroke	MIR15A	MicroRNA 15a	RNA Gene	16	GC13M050049	17.48
Ischemic Stroke	JAG1	Jagged Canonical Notch Ligand 1	Protein Coding	51	GC20M010637	17.47
Ischemic Stroke	CYP2C9	Cytochrome P450 Family 2 Subfamily C Member 9	Protein Coding	50	GC10P094938	17.41
Ischemic Stroke	MIAT	Myocardial Infarction Associated Transcript	RNA Gene	22	GC22P026646	17.37
Ischemic Stroke	NTF3	Neurotrophin 3	Protein Coding	45	GC12P005432	17.35
Ischemic Stroke	CASP9	Caspase 9	Protein Coding	49	GC01M015491	17.35
Ischemic Stroke	GBA	Glucosylceramidase Beta	Protein Coding	49	GC01M155234	17.32
Ischemic Stroke	TGFB1	Transforming Growth Factor Beta 1	Protein Coding	54	GC19M041301	17.29
Ischemic Stroke	PPIG	Peptidylprolyl Isomerase G	Protein Coding	43	GC02P169584	17.25
Ischemic Stroke	SERPIND1	Serpin Family D Member 1	Protein Coding	47	GC22P020810	17.04
Ischemic Stroke	MPL	MPL Proto-Oncogene, Thrombopoietin Receptor	Protein Coding	50	GC01P043337	16.98
Ischemic Stroke	EPO	Erythropoietin	Protein Coding	43	GC07P100720	16.97
Ischemic Stroke	FLT1	Fms Related Receptor Tyrosine Kinase 1	Protein Coding	52	GC13M028300	16.95
Ischemic Stroke	THPO	Thrombopoietin	Protein Coding	44	GC03M184371	16.91
Ischemic Stroke	MMP3	Matrix Metallopeptidase 3	Protein Coding	52	GC11M102835	16.86
Ischemic Stroke	CCM2	CCM2 Scaffold Protein	Protein Coding	43	GC07P044999	16.8
Ischemic Stroke	MT-ATP6	Mitochondrially Encoded ATP Synthase Membrane Subunit 6	Protein Coding	33	GCMTP008531	16.76
Ischemic Stroke	GSR	Glutathione-Disulfide Reductase	Protein Coding	50	GC08M030678	16.7
Ischemic Stroke	LPL	Lipoprotein Lipase	Protein Coding	51	GC08P019901	16.65
Ischemic Stroke	RTN4	Reticulon 4	Protein Coding	46	GC02M054934	16.48
Ischemic Stroke	ACTB	Actin Beta	Protein Coding	50	GC07M005527	16.39
Ischemic Stroke	KIT	KIT Proto-Oncogene, Receptor Tyrosine Kinase	Protein Coding	54	GC04P054657	16.29
Ischemic Stroke	CYP2C19	Cytochrome P450 Family 2 Subfamily C Member 19	Protein Coding	48	GC10P094762	16.27
Ischemic Stroke	FGF2	Fibroblast Growth Factor 2	Protein Coding	49	GC04P122826	16.26
Ischemic Stroke	MIR155	MicroRNA 155	RNA Gene	19	GC21P025573	16.2
Ischemic Stroke	TGFB3	Transforming Growth Factor Beta 3	Protein Coding	48	GC14M075958	16.18
Ischemic Stroke	GHRL	Ghrelin And Obestatin Prepropeptide	Protein Coding	44	GC03M010285	16.1
Ischemic Stroke	LIPC	Lipase C, Hepatic Type	Protein Coding	46	GC15P058410	16.06
Ischemic Stroke	IL4	Interleukin 4	Protein Coding	48	GC05P132673	15.97
Ischemic Stroke	ADD1	Adducin 1	Protein Coding	45	GC04P002856	15.83
Ischemic Stroke	RBFOX3	RNA Binding Fox-1 Homolog 3	Protein Coding	36	GC17M079089	15.82
Ischemic Stroke	MPO	Myeloperoxidase	Protein Coding	51	GC17M058269	15.77
Ischemic Stroke	PDE5A	Phosphodiesterase 5A	Protein Coding	46	GC04M119494	15.75
Ischemic Stroke	SMAD4	SMAD Family Member 4	Protein Coding	52	GC18P051028	15.74
Ischemic Stroke	SLC2A10	Solute Carrier Family 2 Member 10	Protein Coding	45	GC20P046709	15.73
Ischemic Stroke	TSPAN33	Tetraspanin 33	Protein Coding	37	GC07P129298	15.62
Ischemic Stroke	F12	Coagulation Factor XII	Protein Coding	48	GC05M177402	15.55
Ischemic Stroke	MMP2	Matrix Metallopeptidase 2	Protein Coding	55	GC16P055390	15.5
Ischemic Stroke	GJA5	Gap Junction Protein Alpha 5	Protein Coding	47	GC01M147756	15.5
Ischemic Stroke	HSPA1A	Heat Shock Protein Family A (Hsp70) Member 1A	Protein Coding	45	GC06P033429	15.35
Ischemic Stroke	LEP	Leptin	Protein Coding	49	GC07P128241	15.35
Ischemic Stroke	HIF1A	Hypoxia Inducible Factor 1 Subunit Alpha	Protein Coding	49	GC14P061695	15.28
Ischemic Stroke	PDE3A	Phosphodiesterase 3A	Protein Coding	50	GC12P020294	15.19
Ischemic Stroke	IL18	Interleukin 18	Protein Coding	45	GC11M112143	15.18
Ischemic Stroke	TET2	Tet Methylcytosine Dioxygenase 2	Protein Coding	45	GC04P105145	15.11
Ischemic Stroke	ADRB3	Adrenoceptor Beta 3	Protein Coding	46	GC08M037962	14.95
Ischemic Stroke	MYBPC3	Myosin Binding Protein C3	Protein Coding	48	GC11M059693	14.94
Ischemic Stroke	GFAP	Glial Fibrillary Acidic Protein	Protein Coding	49	GC17M044905	14.84
Ischemic Stroke	ITGAM	Integrin Subunit Alpha M	Protein Coding	48	GC16P031420	14.66
Ischemic Stroke	DARS2	Aspartyl-TRNA Synthetase 2, Mitochondrial	Protein Coding	43	GC01P173824	14.63
Ischemic Stroke	CP	Ceruloplasmin	Protein Coding	49	GC03M149162	14.58
Ischemic Stroke	NOS1	Nitric Oxide Synthase 1	Protein Coding	50	GC12M117208	14.45
Ischemic Stroke	CALCA	Calcitonin Related Polypeptide Alpha	Protein Coding	44	GC11M014945	14.43
Ischemic Stroke	F8	Coagulation Factor VIII	Protein Coding	47	GC0XM154835	14.39
Ischemic Stroke	TTN	Titin	Protein Coding	48	GC02M178525	14.38
Ischemic Stroke	TRPV4	Transient Receptor Potential Cation Channel Subfamily V Member 4	Protein Coding	51	GC12M109783	14.36
Ischemic Stroke	DRD4	Dopamine Receptor D4	Protein Coding	47	GC11P000669	14.32
Ischemic Stroke	CBS	Cystathionine Beta-Synthase	Protein Coding	50	GC21M043053	14.31
Ischemic Stroke	CETP	Cholesteryl Ester Transfer Protein	Protein Coding	48	GC16P056961	14.27
Ischemic Stroke	AMPD1	Adenosine Monophosphate Deaminase 1	Protein Coding	46	GC01M114673	14.17
Ischemic Stroke	MFAP5	Microfibril Associated Protein 5	Protein Coding	43	GC12M008637	14.13
Ischemic Stroke	CYP3A5	Cytochrome P450 Family 3 Subfamily A Member 5	Protein Coding	48	GC07M099648	14.11
Ischemic Stroke	AGER	Advanced Glycosylation End-Product Specific Receptor	Protein Coding	45	GC06M032180	14.09
Ischemic Stroke	HSD11B2	Hydroxysteroid 11-Beta Dehydrogenase 2	Protein Coding	47	GC16P067433	14.08
Ischemic Stroke	KCNA5	Potassium Voltage-Gated Channel Subfamily A Member 5	Protein Coding	47	GC12P005043	14.03
Ischemic Stroke	CAT	Catalase	Protein Coding	51	GC11P034460	13.99
Ischemic Stroke	TNNI3	Troponin I3, Cardiac Type	Protein Coding	50	GC19M055151	13.97
Ischemic Stroke	MT-CO3	Mitochondrially Encoded Cytochrome C Oxidase III	Protein Coding	32	GCMTP009209	13.93
Ischemic Stroke	IRS1	Insulin Receptor Substrate 1	Protein Coding	49	GC02M226731	13.93
Ischemic Stroke	ITGA2B	Integrin Subunit Alpha 2b	Protein Coding	52	GC17M044380	13.88
Ischemic Stroke	NGF	Nerve Growth Factor	Protein Coding	52	GC01M115285	13.82
Ischemic Stroke	NPY	Neuropeptide Y	Protein Coding	47	GC07P024290	13.81
Ischemic Stroke	GATA6	GATA Binding Protein 6	Protein Coding	48	GC18P022169	13.78
Ischemic Stroke	MAT2A	Methionine Adenosyltransferase 2A	Protein Coding	48	GC02P085538	13.59
Ischemic Stroke	FOXE3	Forkhead Box E3	Protein Coding	37	GC01P047416	13.59
Ischemic Stroke	CCR2	C-C Motif Chemokine Receptor 2	Protein Coding	47	GC03P046356	13.53
Ischemic Stroke	HMOX1	Heme Oxygenase 1	Protein Coding	54	GC22P035380	13.49
Ischemic Stroke	KCNJ5	Potassium Inwardly Rectifying Channel Subfamily J Member 5	Protein Coding	48	GC11P128891	13.44
Ischemic Stroke	MC4R	Melanocortin 4 Receptor	Protein Coding	46	GC18M060371	13.38
Ischemic Stroke	KRAS	KRAS Proto-Oncogene, GTPase	Protein Coding	52	GC12M025204	13.33
Ischemic Stroke	NEFL	Neurofilament Light	Protein Coding	47	GC08M024950	13.33
Ischemic Stroke	ALDH2	Aldehyde Dehydrogenase 2 Family Member	Protein Coding	52	GC12P111766	13.32
Ischemic Stroke	ECE1	Endothelin Converting Enzyme 1	Protein Coding	48	GC01M021217	13.3
Ischemic Stroke	TIMP1	TIMP Metallopeptidase Inhibitor 1	Protein Coding	47	GC0XP047583	13.29
Ischemic Stroke	SCNN1A	Sodium Channel Epithelial 1 Subunit Alpha	Protein Coding	48	GC12M006346	13.28
Ischemic Stroke	HP	Haptoglobin	Protein Coding	45	GC16P072089	13.24
Ischemic Stroke	CSF3	Colony Stimulating Factor 3	Protein Coding	41	GC17P040015	13.22
Ischemic Stroke	ITGA2	Integrin Subunit Alpha 2	Protein Coding	47	GC05P052989	13.22
Ischemic Stroke	ACHE	Acetylcholinesterase (Cartwright Blood Group)	Protein Coding	47	GC07M100889	13.21
Ischemic Stroke	MIR143	MicroRNA 143	RNA Gene	23	GC05P149410	13.2
Ischemic Stroke	PTGS1	Prostaglandin-Endoperoxide Synthase 1	Protein Coding	48	GC09P122370	13.17
Ischemic Stroke	TYR	Tyrosinase	Protein Coding	48	GC11P089177	13.09
Ischemic Stroke	HBB	Hemoglobin Subunit Beta	Protein Coding	47	GC11M005334	13.05
Ischemic Stroke	CYP11B1	Cytochrome P450 Family 11 Subfamily B Member 1	Protein Coding	47	GC08M142872	13.01
Ischemic Stroke	FLNA	Filamin A	Protein Coding	50	GC0XM154348	12.97
Ischemic Stroke	PCNT	Pericentrin	Protein Coding	42	GC21P046324	12.94
Ischemic Stroke	ENPP1	Ectonucleotide Pyrophosphatase/Phosphodiesterase 1	Protein Coding	47	GC06P131808	12.88
Ischemic Stroke	PRKAG2	Protein Kinase AMP-Activated Non-Catalytic Subunit Gamma 2	Protein Coding	51	GC07M151556	12.81
Ischemic Stroke	SLC2A4	Solute Carrier Family 2 Member 4	Protein Coding	47	GC17P007282	12.8
Ischemic Stroke	MIR146A	MicroRNA 146a	RNA Gene	24	GC05P160485	12.79
Ischemic Stroke	PKD1	Polycystin 1, Transient Receptor Potential Channel Interacting	Protein Coding	46	GC16M002170	12.76
Ischemic Stroke	IAPP	Islet Amyloid Polypeptide	Protein Coding	41	GC12P021354	12.64
Ischemic Stroke	PROC	Protein C, Inactivator Of Coagulation Factors Va And VIIIa	Protein Coding	51	GC02P127418	12.64
Ischemic Stroke	IL17A	Interleukin 17A	Protein Coding	44	GC06P052186	12.54
Ischemic Stroke	KCNJ11	Potassium Inwardly Rectifying Channel Subfamily J Member 11	Protein Coding	49	GC11M017364	12.53
Ischemic Stroke	WFS1	Wolframin ER Transmembrane Glycoprotein	Protein Coding	45	GC04P006271	12.48
Ischemic Stroke	MIR17	MicroRNA 17	RNA Gene	21	GC13P091350	12.46
Ischemic Stroke	CORIN	Corin, Serine Peptidase	Protein Coding	45	GC04M047596	12.41
Ischemic Stroke	PRL	Prolactin	Protein Coding	44	GC06M022230	12.4
Ischemic Stroke	INSR	Insulin Receptor	Protein Coding	55	GC19M007112	12.39
Ischemic Stroke	MIR145	MicroRNA 145	RNA Gene	22	GC05P149430	12.27
Ischemic Stroke	MIR208A	MicroRNA 208a	RNA Gene	19	GC14M023388	12.15
Ischemic Stroke	KDR	Kinase Insert Domain Receptor	Protein Coding	55	GC04M055078	12.12
Ischemic Stroke	F13A1	Coagulation Factor XIII A Chain	Protein Coding	47	GC06M006144	12.11
Ischemic Stroke	CX3CR1	C-X3-C Motif Chemokine Receptor 1	Protein Coding	46	GC03M039279	12.06
Ischemic Stroke	CPS1	Carbamoyl-Phosphate Synthase 1	Protein Coding	47	GC02P210477	12.05
Ischemic Stroke	TNFRSF11B	TNF Receptor Superfamily Member 11b	Protein Coding	49	GC08M118923	11.98
Ischemic Stroke	XDH	Xanthine Dehydrogenase	Protein Coding	47	GC02M031294	11.96
Ischemic Stroke	NCF1	Neutrophil Cytosolic Factor 1	Protein Coding	49	GC07P074773	11.94
Ischemic Stroke	MYD88	MYD88 Innate Immune Signal Transduction Adaptor	Protein Coding	51	GC03P038179	11.88
Ischemic Stroke	GPT	Glutamic--Pyruvic Transaminase	Protein Coding	42	GC08P144502	11.88
Ischemic Stroke	TLR2	Toll Like Receptor 2	Protein Coding	52	GC04P153684	11.87
Ischemic Stroke	GRIN2A	Glutamate Ionotropic Receptor NMDA Type Subunit 2A	Protein Coding	52	GC16M009753	11.87
Ischemic Stroke	NAGS	N-Acetylglutamate Synthase	Protein Coding	43	GC17P044004	11.82
Ischemic Stroke	ADRB1	Adrenoceptor Beta 1	Protein Coding	49	GC10P114044	11.79
Ischemic Stroke	CDK5	Cyclin Dependent Kinase 5	Protein Coding	54	GC07M151053	11.75
Ischemic Stroke	MIR132	MicroRNA 132	RNA Gene	22	GC17M002049	11.74
Ischemic Stroke	KLKB1	Kallikrein B1	Protein Coding	49	GC04P186208	11.65
Ischemic Stroke	MMP1	Matrix Metallopeptidase 1	Protein Coding	53	GC11M102810	11.62
Ischemic Stroke	OTC	Ornithine Carbamoyltransferase	Protein Coding	48	GC0XP038353	11.62
Ischemic Stroke	IL2	Interleukin 2	Protein Coding	47	GC04M122451	11.59
Ischemic Stroke	BRCA2	BRCA2 DNA Repair Associated	Protein Coding	50	GC13P032315	11.53
Ischemic Stroke	ATM	ATM Serine/Threonine Kinase	Protein Coding	55	GC11P108222	11.53
Ischemic Stroke	MTR	5-Methyltetrahydrofolate-Homocysteine Methyltransferase	Protein Coding	47	GC01P236795	11.51
Ischemic Stroke	PLA2G2A	Phospholipase A2 Group IIA	Protein Coding	47	GC01M019975	11.48
Ischemic Stroke	INF2	Inverted Formin, FH2 And WH2 Domain Containing	Protein Coding	41	GC14P104690	11.4
Ischemic Stroke	CELA2A	Chymotrypsin Like Elastase 2A	Protein Coding	40	GC01P015456	11.4
Ischemic Stroke	DRD1	Dopamine Receptor D1	Protein Coding	45	GC05M175440	11.37
Ischemic Stroke	PPARA	Peroxisome Proliferator Activated Receptor Alpha	Protein Coding	47	GC22P046150	11.35
Ischemic Stroke	GNAS	GNAS Complex Locus	Protein Coding	53	GC20P058839	11.33
Ischemic Stroke	SON	SON DNA Binding Protein	Protein Coding	40	GC21P033542	11.31
Ischemic Stroke	FCGR2A	Fc Fragment Of IgG Receptor IIa	Protein Coding	47	GC01P161505	11.26
Ischemic Stroke	CACNA1A	Calcium Voltage-Gated Channel Subunit Alpha1 A	Protein Coding	50	GC19M013206	11.23
Ischemic Stroke	EPHX2	Epoxide Hydrolase 2	Protein Coding	49	GC08P027490	11.2
Ischemic Stroke	MYMY1	Moyamoya Disease 1	Genetic Locus	4	GC03U900234	11.16
Ischemic Stroke	MYMY3	Moyamoya Disease 3	Genetic Locus	4	GC08U900539	11.16
Ischemic Stroke	CD14	CD14 Molecule	Protein Coding	46	GC05M140631	11.15
Ischemic Stroke	MEN1	Menin 1	Protein Coding	48	GC11M064803	11.13
Ischemic Stroke	COMT	Catechol-O-Methyltransferase	Protein Coding	52	GC22P019941	11.12
Ischemic Stroke	GCKR	Glucokinase Regulator	Protein Coding	42	GC02P027496	11.08
Ischemic Stroke	CYBA	Cytochrome B-245 Alpha Chain	Protein Coding	47	GC16M088643	11.05
Ischemic Stroke	ITGB2	Integrin Subunit Beta 2	Protein Coding	52	GC21M044885	11.05
Ischemic Stroke	LCN2	Lipocalin 2	Protein Coding	45	GC09P128149	11.03
Ischemic Stroke	CCND1	Cyclin D1	Protein Coding	53	GC11P069641	11.02
Ischemic Stroke	HSPA5	Heat Shock Protein Family A (Hsp70) Member 5	Protein Coding	48	GC09M125234	11.01
Ischemic Stroke	ATP1A3	ATPase Na+/K+ Transporting Subunit Alpha 3	Protein Coding	48	GC19M041966	11.01
Ischemic Stroke	CCR5	C-C Motif Chemokine Receptor 5 (Gene/Pseudogene)	Protein Coding	48	GC03P046384	11
Ischemic Stroke	ZMPSTE24	Zinc Metallopeptidase STE24	Protein Coding	44	GC01P040258	10.97
Ischemic Stroke	GGT1	Gamma-Glutamyltransferase 1	Protein Coding	48	GC22P024583	10.97
Ischemic Stroke	FOS	Fos Proto-Oncogene, AP-1 Transcription Factor Subunit	Protein Coding	52	GC14P075278	10.9
Ischemic Stroke	IL1RN	Interleukin 1 Receptor Antagonist	Protein Coding	50	GC02P114906	10.89
Ischemic Stroke	PTPN1	Protein Tyrosine Phosphatase Non-Receptor Type 1	Protein Coding	52	GC20P050510	10.87
Ischemic Stroke	SCN1A	Sodium Voltage-Gated Channel Alpha Subunit 1	Protein Coding	48	GC02M165989	10.87
Ischemic Stroke	IRS2	Insulin Receptor Substrate 2	Protein Coding	45	GC13M109752	10.87
Ischemic Stroke	ACAN	Aggrecan	Protein Coding	47	GC15P088814	10.87
Ischemic Stroke	ELP1	Elongator Complex Protein 1	Protein Coding	35	GC09M108868	10.86
Ischemic Stroke	TNFSF4	TNF Superfamily Member 4	Protein Coding	42	GC01M173183	10.85
Ischemic Stroke	STAT3	Signal Transducer And Activator Of Transcription 3	Protein Coding	54	GC17M042313	10.84
Ischemic Stroke	S100B	S100 Calcium Binding Protein B	Protein Coding	47	GC21M047166	10.83
Ischemic Stroke	NLRP3	NLR Family Pyrin Domain Containing 3	Protein Coding	48	GC01P247415	10.82
Ischemic Stroke	GCGR	Glucagon Receptor	Protein Coding	48	GC17P081804	10.79
Ischemic Stroke	COL4A5	Collagen Type IV Alpha 5 Chain	Protein Coding	43	GC0XP108439	10.79
Ischemic Stroke	SCNN1B	Sodium Channel Epithelial 1 Subunit Beta	Protein Coding	50	GC16P023278	10.77
Ischemic Stroke	MT-CO2	Mitochondrially Encoded Cytochrome C Oxidase II	Protein Coding	35	GCMTP007587	10.69
Ischemic Stroke	BCL2L1	BCL2 Like 1	Protein Coding	49	GC20M031664	10.56
Ischemic Stroke	CTF1	Cardiotrophin 1	Protein Coding	41	GC16P030910	10.51
Ischemic Stroke	VDR	Vitamin D Receptor	Protein Coding	53	GC12M047841	10.5
Ischemic Stroke	ERAP1	Endoplasmic Reticulum Aminopeptidase 1	Protein Coding	45	GC05M096760	10.49
Ischemic Stroke	ASS1	Argininosuccinate Synthase 1	Protein Coding	50	GC09P130444	10.48
Ischemic Stroke	TAC1	Tachykinin Precursor 1	Protein Coding	44	GC07P097731	10.46
Ischemic Stroke	PVALB	Parvalbumin	Protein Coding	41	GC22M036800	10.45
Ischemic Stroke	MTOR	Mechanistic Target Of Rapamycin Kinase	Protein Coding	54	GC01M011106	10.45
Ischemic Stroke	SCNN1G	Sodium Channel Epithelial 1 Subunit Gamma	Protein Coding	47	GC16P023182	10.44
Ischemic Stroke	HHT4	Telangiectasia, Hereditary Hemorrhagic, Type 4	Genetic Locus	2	GC07U901803	10.42
Ischemic Stroke	EGF	Epidermal Growth Factor	Protein Coding	52	GC04P109912	10.4
Ischemic Stroke	IFNG	Interferon Gamma	Protein Coding	50	GC12M068064	10.39
Ischemic Stroke	SCN8A	Sodium Voltage-Gated Channel Alpha Subunit 8	Protein Coding	47	GC12P051590	10.38
Ischemic Stroke	ITPR1	Inositol 1,4,5-Trisphosphate Receptor Type 1	Protein Coding	50	GC03P004486	10.35
Ischemic Stroke	NAMPT	Nicotinamide Phosphoribosyltransferase	Protein Coding	50	GC07M106248	10.33
Ischemic Stroke	PDGFRA	Platelet Derived Growth Factor Receptor Alpha	Protein Coding	56	GC04P054229	10.33
Ischemic Stroke	KCNMB1	Potassium Calcium-Activated Channel Subfamily M Regulatory Beta Subunit 1	Protein Coding	43	GC05M170374	10.31
Ischemic Stroke	CYP4F2	Cytochrome P450 Family 4 Subfamily F Member 2	Protein Coding	45	GC19M015878	10.29
Ischemic Stroke	CSF2	Colony Stimulating Factor 2	Protein Coding	45	GC05P132073	10.27
Ischemic Stroke	APOA5	Apolipoprotein A5	Protein Coding	44	GC11M116789	10.26
Ischemic Stroke	SLC1A3	Solute Carrier Family 1 Member 3	Protein Coding	51	GC05P036606	10.24
Ischemic Stroke	BGN	Biglycan	Protein Coding	44	GC0XP153494	10.22
Ischemic Stroke	C3	Complement C3	Protein Coding	49	GC19M006677	10.2
Ischemic Stroke	NPR3	Natriuretic Peptide Receptor 3	Protein Coding	45	GC05P032689	10.17
Ischemic Stroke	ADD3	Adducin 3	Protein Coding	43	GC10P109996	10.16
Ischemic Stroke	DES	Desmin	Protein Coding	49	GC02P219418	10.15
Ischemic Stroke	ATP1B1	ATPase Na+/K+ Transporting Subunit Beta 1	Protein Coding	48	GC01P169105	10.12
Ischemic Stroke	PKD2	Polycystin 2, Transient Receptor Potential Cation Channel	Protein Coding	47	GC04P088007	10.07
Ischemic Stroke	CSTB	Cystatin B	Protein Coding	47	GC21M043772	10.07
Ischemic Stroke	MIR33A	MicroRNA 33a	RNA Gene	19	GC22P041900	10.07
Ischemic Stroke	CYP3A4	Cytochrome P450 Family 3 Subfamily A Member 4	Protein Coding	51	GC07M099759	10.05
Ischemic Stroke	DRD2	Dopamine Receptor D2	Protein Coding	52	GC11M113409	10.01
Ischemic Stroke	MFN2	Mitofusin 2	Protein Coding	50	GC01P011980	9.96
Ischemic Stroke	HTR1A	5-Hydroxytryptamine Receptor 1A	Protein Coding	48	GC05M063960	9.95
Ischemic Stroke	HSPB8	Heat Shock Protein Family B (Small) Member 8	Protein Coding	46	GC12P119178	9.95
Ischemic Stroke	CYP2C8	Cytochrome P450 Family 2 Subfamily C Member 8	Protein Coding	50	GC10M095038	9.91
Ischemic Stroke	HTR3A	5-Hydroxytryptamine Receptor 3A	Protein Coding	47	GC11P113974	9.84
Ischemic Stroke	MGP	Matrix Gla Protein	Protein Coding	43	GC12M014881	9.84
Ischemic Stroke	MRAS	Muscle RAS Oncogene Homolog	Protein Coding	47	GC03P138347	9.81
Ischemic Stroke	FABP4	Fatty Acid Binding Protein 4	Protein Coding	46	GC08M081478	9.8
Ischemic Stroke	RBP4	Retinol Binding Protein 4	Protein Coding	45	GC10M093591	9.76
Ischemic Stroke	ODC1	Ornithine Decarboxylase 1	Protein Coding	48	GC02M010432	9.76
Ischemic Stroke	PGF	Placental Growth Factor	Protein Coding	45	GC14M074941	9.76
Ischemic Stroke	HYT1	Hypertension, Essential, Susceptibility To, 1	Genetic Locus	3	GC17U990303	9.73
Ischemic Stroke	RGS5	Regulator Of G Protein Signaling 5	Protein Coding	41	GC01M163111	9.67
Ischemic Stroke	HYT2	Hypertension, Essential, Susceptibility To, 2	Genetic Locus	3	GC15U990105	9.67
Ischemic Stroke	HYT3	Hypertension, Essential, Susceptibility To, 3	Genetic Locus	3	GC02U900228	9.67
Ischemic Stroke	HYT4	Hypertension, Essential, Susceptibility To, 4	Genetic Locus	3	GC12U900475	9.67
Ischemic Stroke	HYT8	Hypertension, Essential, Susceptibility To, 8	Genetic Locus	3	GC18U900482	9.67
Ischemic Stroke	HYT5	Hypertension, Essential, Susceptibility To, 5	Genetic Locus	2	GC20U900425	9.67
Ischemic Stroke	HYT6	Hypertension, Essential, Susceptibility To, 6	Genetic Locus	2	GC05U901045	9.67
Ischemic Stroke	HYT7	Hypertension, Essential, Susceptibility To, 7	Genetic Locus	2	GC03U901240	9.67
Ischemic Stroke	GRIN2B	Glutamate Ionotropic Receptor NMDA Type Subunit 2B	Protein Coding	51	GC12M013437	9.66
Ischemic Stroke	SCN2A	Sodium Voltage-Gated Channel Alpha Subunit 2	Protein Coding	48	GC02P165130	9.65
Ischemic Stroke	CLCN1	Chloride Voltage-Gated Channel 1	Protein Coding	45	GC07P143316	9.65
Ischemic Stroke	ACTG1	Actin Gamma 1	Protein Coding	51	GC17M081509	9.65
Ischemic Stroke	HABP2	Hyaluronan Binding Protein 2	Protein Coding	44	GC10P113550	9.64
Ischemic Stroke	CDKN2A	Cyclin Dependent Kinase Inhibitor 2A	Protein Coding	52	GC09M021967	9.62
Ischemic Stroke	NR3C2	Nuclear Receptor Subfamily 3 Group C Member 2	Protein Coding	49	GC04M148078	9.57
Ischemic Stroke	MMUT	Methylmalonyl-CoA Mutase	Protein Coding	36	GC06M049430	9.54
Ischemic Stroke	KMO	Kynurenine 3-Monooxygenase	Protein Coding	45	GC01P241532	9.52
Ischemic Stroke	SLC1A1	Solute Carrier Family 1 Member 1	Protein Coding	49	GC09P004490	9.52
Ischemic Stroke	LEPR	Leptin Receptor	Protein Coding	51	GC01P065421	9.51
Ischemic Stroke	GDF2	Growth Differentiation Factor 2	Protein Coding	43	GC10P047322	9.49
Ischemic Stroke	MMP8	Matrix Metallopeptidase 8	Protein Coding	48	GC11M102617	9.49
Ischemic Stroke	TEK	TEK Receptor Tyrosine Kinase	Protein Coding	52	GC09P027109	9.48
Ischemic Stroke	KCNMA1	Potassium Calcium-Activated Channel Subfamily M Alpha 1	Protein Coding	51	GC10M076869	9.45
Ischemic Stroke	HSPB1	Heat Shock Protein Family B (Small) Member 1	Protein Coding	52	GC07P076302	9.45
Ischemic Stroke	NEFH	Neurofilament Heavy	Protein Coding	47	GC22P029480	9.44
Ischemic Stroke	ABCB1	ATP Binding Cassette Subfamily B Member 1	Protein Coding	52	GC07M087504	9.42
Ischemic Stroke	MIR125A	MicroRNA 125a	RNA Gene	21	GC19P051723	9.41
Ischemic Stroke	CD40	CD40 Molecule	Protein Coding	50	GC20P046118	9.39
Ischemic Stroke	B2M	Beta-2-Microglobulin	Protein Coding	50	GC15P044711	9.39
Ischemic Stroke	CACNA1C	Calcium Voltage-Gated Channel Subunit Alpha1 C	Protein Coding	50	GC12P001970	9.39
Ischemic Stroke	TGFBR3	Transforming Growth Factor Beta Receptor 3	Protein Coding	47	GC01M091680	9.37
Ischemic Stroke	PITX2	Paired Like Homeodomain 2	Protein Coding	47	GC04M110617	9.37
Ischemic Stroke	XIAP	X-Linked Inhibitor Of Apoptosis	Protein Coding	51	GC0XP123859	9.35
Ischemic Stroke	MIR140	MicroRNA 140	RNA Gene	22	GC16P069934	9.34
Ischemic Stroke	MAPK8	Mitogen-Activated Protein Kinase 8	Protein Coding	51	GC10P048306	9.33
Ischemic Stroke	TNFRSF1B	TNF Receptor Superfamily Member 1B	Protein Coding	49	GC01P012167	9.33
Ischemic Stroke	CYP4A11	Cytochrome P450 Family 4 Subfamily A Member 11	Protein Coding	44	GC01M046929	9.32
Ischemic Stroke	PTX3	Pentraxin 3	Protein Coding	43	GC03P157436	9.3
Ischemic Stroke	CAPN3	Calpain 3	Protein Coding	48	GC15P042359	9.26
Ischemic Stroke	SLC9A1	Solute Carrier Family 9 Member A1	Protein Coding	52	GC01M027109	9.24
Ischemic Stroke	CYP2J2	Cytochrome P450 Family 2 Subfamily J Member 2	Protein Coding	45	GC01M059893	9.24
Ischemic Stroke	NR2F2	Nuclear Receptor Subfamily 2 Group F Member 2	Protein Coding	50	GC15P096325	9.24
Ischemic Stroke	OPN4	Opsin 4	Protein Coding	41	GC10P086654	9.21
Ischemic Stroke	BAD	BCL2 Associated Agonist Of Cell Death	Protein Coding	48	GC11M064273	9.2
Ischemic Stroke	GAPDH	Glyceraldehyde-3-Phosphate Dehydrogenase	Protein Coding	50	GC12P006630	9.14
Ischemic Stroke	JUN	Jun Proto-Oncogene, AP-1 Transcription Factor Subunit	Protein Coding	51	GC01M058780	9.1
Ischemic Stroke	PAPPA	Pappalysin 1	Protein Coding	42	GC09P116171	9.1
Ischemic Stroke	FURIN	Furin, Paired Basic Amino Acid Cleaving Enzyme	Protein Coding	48	GC15P090868	9.06
Ischemic Stroke	GJA4	Gap Junction Protein Alpha 4	Protein Coding	44	GC01P034792	9.06
Ischemic Stroke	LRP1	LDL Receptor Related Protein 1	Protein Coding	48	GC12P057128	9.03
Ischemic Stroke	CYP2D6	Cytochrome P450 Family 2 Subfamily D Member 6	Protein Coding	50	GC22M044576	9.03
Ischemic Stroke	HDAC9	Histone Deacetylase 9	Protein Coding	48	GC07P018086	9.03
Ischemic Stroke	LCAT	Lecithin-Cholesterol Acyltransferase	Protein Coding	48	GC16M067939	9
Ischemic Stroke	KL	Klotho	Protein Coding	45	GC13P033016	8.97
Ischemic Stroke	CD63	CD63 Molecule	Protein Coding	43	GC12M055725	8.97
Ischemic Stroke	CCL5	C-C Motif Chemokine Ligand 5	Protein Coding	45	GC17M035871	8.95
Ischemic Stroke	CCL11	C-C Motif Chemokine Ligand 11	Protein Coding	45	GC17P034285	8.95
Ischemic Stroke	FKRP	Fukutin Related Protein	Protein Coding	41	GC19P046746	8.94
Ischemic Stroke	YY1AP1	YY1 Associated Protein 1	Protein Coding	39	GC01M155659	8.83
Ischemic Stroke	RNLS	Renalase, FAD Dependent Amine Oxidase	Protein Coding	40	GC10M088180	8.82
Ischemic Stroke	CASP2	Caspase 2	Protein Coding	50	GC07P144746	8.81
Ischemic Stroke	SLC25A13	Solute Carrier Family 25 Member 13	Protein Coding	47	GC07M096120	8.81
Ischemic Stroke	PRDM16	PR/SET Domain 16	Protein Coding	46	GC01P003068	8.81
Ischemic Stroke	CDKN2B	Cyclin Dependent Kinase Inhibitor 2B	Protein Coding	48	GC09M022002	8.78
Ischemic Stroke	MIR210	MicroRNA 210	RNA Gene	21	GC11M000622	8.77
Ischemic Stroke	SLC6A3	Solute Carrier Family 6 Member 3	Protein Coding	51	GC05M001392	8.77
Ischemic Stroke	FN1	Fibronectin 1	Protein Coding	51	GC02M215360	8.76
Ischemic Stroke	IL3	Interleukin 3	Protein Coding	45	GC05P132060	8.76
Ischemic Stroke	BCL2	BCL2 Apoptosis Regulator	Protein Coding	53	GC18M063123	8.75
Ischemic Stroke	PTEN	Phosphatase And Tensin Homolog	Protein Coding	54	GC10P087863	8.75
Ischemic Stroke	SST	Somatostatin	Protein Coding	43	GC03M187668	8.74
Ischemic Stroke	PTK2B	Protein Tyrosine Kinase 2 Beta	Protein Coding	50	GC08P027311	8.74
Ischemic Stroke	UCP2	Uncoupling Protein 2	Protein Coding	47	GC11M073974	8.68
Ischemic Stroke	PTH	Parathyroid Hormone	Protein Coding	48	GC11M013492	8.68
Ischemic Stroke	NSF	N-Ethylmaleimide Sensitive Factor, Vesicle Fusing ATPase	Protein Coding	45	GC17P046590	8.66
Ischemic Stroke	CD34	CD34 Molecule	Protein Coding	45	GC01M207880	8.63
Ischemic Stroke	ADRA2A	Adrenoceptor Alpha 2A	Protein Coding	48	GC10P111077	8.61
Ischemic Stroke	GC	GC Vitamin D Binding Protein	Protein Coding	44	GC04M071741	8.58
Ischemic Stroke	CLCN2	Chloride Voltage-Gated Channel 2	Protein Coding	46	GC03M184346	8.56
Ischemic Stroke	AMBP	Alpha-1-Microglobulin/Bikunin Precursor	Protein Coding	43	GC09M114060	8.55
Ischemic Stroke	KRIT1	KRIT1 Ankyrin Repeat Containing	Protein Coding	43	GC07M092198	8.52
Ischemic Stroke	ELANE	Elastase, Neutrophil Expressed	Protein Coding	48	GC19P000854	8.52
Ischemic Stroke	LTA	Lymphotoxin Alpha	Protein Coding	43	GC06P033395	8.49
Ischemic Stroke	SOCS1	Suppressor Of Cytokine Signaling 1	Protein Coding	45	GC16M011255	8.46
Ischemic Stroke	CMA1	Chymase 1	Protein Coding	45	GC14M024506	8.44
Ischemic Stroke	MBL2	Mannose Binding Lectin 2	Protein Coding	48	GC10M052760	8.43
Ischemic Stroke	GRN	Granulin Precursor	Protein Coding	48	GC17P044345	8.42
Ischemic Stroke	CDH5	Cadherin 5	Protein Coding	48	GC16P066366	8.41
Ischemic Stroke	CLU	Clusterin	Protein Coding	48	GC08M027596	8.4
Ischemic Stroke	GCG	Glucagon	Protein Coding	42	GC02M162142	8.38
Ischemic Stroke	KYNU	Kynureninase	Protein Coding	47	GC02P142748	8.38
Ischemic Stroke	H19	H19 Imprinted Maternally Expressed Transcript	RNA Gene	28	GC11M001995	8.37
Ischemic Stroke	CRH	Corticotropin Releasing Hormone	Protein Coding	45	GC08M066176	8.34
Ischemic Stroke	FCGR3B	Fc Fragment Of IgG Receptor IIIb	Protein Coding	44	GC01M161623	8.33
Ischemic Stroke	LEMD3	LEM Domain Containing 3	Protein Coding	42	GC12P065169	8.32
Ischemic Stroke	DBH	Dopamine Beta-Hydroxylase	Protein Coding	51	GC09P133636	8.29
Ischemic Stroke	TLR8	Toll Like Receptor 8	Protein Coding	49	GC0XP012924	8.29
Ischemic Stroke	OPRM1	Opioid Receptor Mu 1	Protein Coding	50	GC06P154075	8.29
Ischemic Stroke	ARG1	Arginase 1	Protein Coding	51	GC06P131473	8.28
Ischemic Stroke	MIR9-1	MicroRNA 9-1	RNA Gene	21	GC01M156420	8.26
Ischemic Stroke	CD4	CD4 Molecule	Protein Coding	51	GC12P006786	8.26
Ischemic Stroke	TIMP2	TIMP Metallopeptidase Inhibitor 2	Protein Coding	45	GC17M078852	8.25
Ischemic Stroke	BDKRB2	Bradykinin Receptor B2	Protein Coding	45	GC14P096205	8.24
Ischemic Stroke	ZFHX3	Zinc Finger Homeobox 3	Protein Coding	43	GC16M072782	8.23
Ischemic Stroke	TLR7	Toll Like Receptor 7	Protein Coding	48	GC0XP012867	8.23
Ischemic Stroke	WDTC1	WD And Tetratricopeptide Repeats 1	Protein Coding	35	GC01P027245	8.21
Ischemic Stroke	APOA2	Apolipoprotein A2	Protein Coding	45	GC01M161222	8.18
Ischemic Stroke	GATA3	GATA Binding Protein 3	Protein Coding	50	GC10P008045	8.17
Ischemic Stroke	NOTCH4	Notch Receptor 4	Protein Coding	47	GC06M032407	8.17
Ischemic Stroke	BGLAP	Bone Gamma-Carboxyglutamate Protein	Protein Coding	41	GC01P156242	8.15
Ischemic Stroke	APLNR	Apelin Receptor	Protein Coding	44	GC11M057233	8.14
Ischemic Stroke	H2AC18	H2A Clustered Histone 18	Protein Coding	27	GC01M149914	8.14
Ischemic Stroke	SYNGAP1	Synaptic Ras GTPase Activating Protein 1	Protein Coding	44	GC06P033419	8.13
Ischemic Stroke	TLR3	Toll Like Receptor 3	Protein Coding	54	GC04P186059	8.13
Ischemic Stroke	CHIT1	Chitinase 1	Protein Coding	45	GC01M203181	8.09
Ischemic Stroke	FTO	FTO Alpha-Ketoglutarate Dependent Dioxygenase	Protein Coding	45	GC16P053737	8.09
Ischemic Stroke	CFLAR	CASP8 And FADD Like Apoptosis Regulator	Protein Coding	48	GC02P201117	8.06
Ischemic Stroke	HGF	Hepatocyte Growth Factor	Protein Coding	53	GC07M081699	8.05
Ischemic Stroke	DLL4	Delta Like Canonical Notch Ligand 4	Protein Coding	47	GC15P040929	8.04
Ischemic Stroke	CAV1	Caveolin 1	Protein Coding	50	GC07P116524	8.03
Ischemic Stroke	APOL1	Apolipoprotein L1	Protein Coding	43	GC22P036253	8.03
Ischemic Stroke	OXT	Oxytocin/Neurophysin I Prepropeptide	Protein Coding	41	GC20P003068	8.02
Ischemic Stroke	SGK1	Serum/Glucocorticoid Regulated Kinase 1	Protein Coding	50	GC06M134169	8
Ischemic Stroke	FGF23	Fibroblast Growth Factor 23	Protein Coding	47	GC12M004368	7.95
Ischemic Stroke	MEFV	MEFV Innate Immuity Regulator, Pyrin	Protein Coding	44	GC16M003259	7.93
Ischemic Stroke	CHI3L1	Chitinase 3 Like 1	Protein Coding	45	GC01M203148	7.93
Ischemic Stroke	PDGFRB	Platelet Derived Growth Factor Receptor Beta	Protein Coding	56	GC05M150113	7.92
Ischemic Stroke	GSTM1	Glutathione S-Transferase Mu 1	Protein Coding	43	GC01P109687	7.91
Ischemic Stroke	SCN5A	Sodium Voltage-Gated Channel Alpha Subunit 5	Protein Coding	51	GC03M038549	7.9
Ischemic Stroke	ROCK1	Rho Associated Coiled-Coil Containing Protein Kinase 1	Protein Coding	51	GC18M020946	7.86
Ischemic Stroke	OPTN	Optineurin	Protein Coding	45	GC10P013141	7.84
Ischemic Stroke	PHACTR1	Phosphatase And Actin Regulator 1	Protein Coding	38	GC06P012717	7.83
Ischemic Stroke	CYBB	Cytochrome B-245 Beta Chain	Protein Coding	48	GC0XP037780	7.83
Ischemic Stroke	ANGPT2	Angiopoietin 2	Protein Coding	46	GC08M006499	7.82
Ischemic Stroke	VIP	Vasoactive Intestinal Peptide	Protein Coding	46	GC06P152750	7.81
Ischemic Stroke	CD36	CD36 Molecule	Protein Coding	50	GC07P080369	7.78
Ischemic Stroke	FXN	Frataxin	Protein Coding	46	GC09P069035	7.78
Ischemic Stroke	DLL3	Delta Like Canonical Notch Ligand 3	Protein Coding	42	GC19P039498	7.78
Ischemic Stroke	MGR5	Migraine With Or Without Aura, Susceptibility To, 5	Genetic Locus	3	GC19U900053	7.78
Ischemic Stroke	MGR6	Migraine, Several Forms	Genetic Locus	3	GC01U904111	7.78
Ischemic Stroke	DENND11	DENN Domain Containing 11	Protein Coding	26	GC07M141656	7.78
Ischemic Stroke	HK1	Hexokinase 1	Protein Coding	52	GC10P069269	7.75
Ischemic Stroke	RYR2	Ryanodine Receptor 2	Protein Coding	48	GC01P237042	7.74
Ischemic Stroke	DLL1	Delta Like Canonical Notch Ligand 1	Protein Coding	46	GC06M170282	7.74
Ischemic Stroke	CCN2	Cellular Communication Network Factor 2	Protein Coding	40	GC06M131948	7.73
Ischemic Stroke	CALCRL	Calcitonin Receptor Like Receptor	Protein Coding	44	GC02M187341	7.71
Ischemic Stroke	MIR223	MicroRNA 223	RNA Gene	22	GC0XP066018	7.71
Ischemic Stroke	HEY2	Hes Related Family BHLH Transcription Factor With YRPW Motif 2	Protein Coding	39	GC06P125730	7.7
Ischemic Stroke	RBPJ	Recombination Signal Binding Protein For Immunoglobulin Kappa J Region	Protein Coding	48	GC04P026165	7.69
Ischemic Stroke	CYP17A1	Cytochrome P450 Family 17 Subfamily A Member 1	Protein Coding	50	GC10M102830	7.66
Ischemic Stroke	NOTCH2	Notch Receptor 2	Protein Coding	51	GC01M119911	7.64
Ischemic Stroke	JAG2	Jagged Canonical Notch Ligand 2	Protein Coding	43	GC14M105140	7.64
Ischemic Stroke	HEY1	Hes Related Family BHLH Transcription Factor With YRPW Motif 1	Protein Coding	43	GC08M079764	7.64
Ischemic Stroke	GNLY	Granulysin	Protein Coding	40	GC02P085685	7.64
Ischemic Stroke	SRRT	Serrate, RNA Effector Molecule	Protein Coding	39	GC07P100875	7.64
Ischemic Stroke	MYH9	Myosin Heavy Chain 9	Protein Coding	50	GC22M036281	7.63
Ischemic Stroke	SREBF1	Sterol Regulatory Element Binding Transcription Factor 1	Protein Coding	45	GC17M017810	7.62
Ischemic Stroke	CCR6	C-C Motif Chemokine Receptor 6	Protein Coding	46	GC06P167111	7.62
Ischemic Stroke	MAOA	Monoamine Oxidase A	Protein Coding	51	GC0XP043654	7.61
Ischemic Stroke	TLR5	Toll Like Receptor 5	Protein Coding	49	GC01M223109	7.6
Ischemic Stroke	MME	Membrane Metalloendopeptidase	Protein Coding	52	GC03P155024	7.57
Ischemic Stroke	ADRA2C	Adrenoceptor Alpha 2C	Protein Coding	47	GC04P003766	7.57
Ischemic Stroke	MAOB	Monoamine Oxidase B	Protein Coding	44	GC0XM043766	7.56
Ischemic Stroke	TCF7L2	Transcription Factor 7 Like 2	Protein Coding	47	GC10P112950	7.56
Ischemic Stroke	TRPV1	Transient Receptor Potential Cation Channel Subfamily V Member 1	Protein Coding	47	GC17M003565	7.54
Ischemic Stroke	IFNA1	Interferon Alpha 1	Protein Coding	40	GC09P021478	7.54
Ischemic Stroke	WNK1	WNK Lysine Deficient Protein Kinase 1	Protein Coding	48	GC12P000733	7.53
Ischemic Stroke	ADRA2B	Adrenoceptor Alpha 2B	Protein Coding	47	GC02M096112	7.53
Ischemic Stroke	APLN	Apelin	Protein Coding	39	GC0XM129645	7.51
Ischemic Stroke	DRD3	Dopamine Receptor D3	Protein Coding	45	GC03M114128	7.51
Ischemic Stroke	HEYL	Hes Related Family BHLH Transcription Factor With YRPW Motif Like	Protein Coding	40	GC01M039623	7.49
Ischemic Stroke	C5	Complement C5	Protein Coding	48	GC09M120952	7.49
Ischemic Stroke	HAVCR1	Hepatitis A Virus Cellular Receptor 1	Protein Coding	43	GC05M157007	7.48
Ischemic Stroke	DPP4	Dipeptidyl Peptidase 4	Protein Coding	51	GC02M161992	7.45
Ischemic Stroke	SMARCA4	SWI/SNF Related, Matrix Associated, Actin Dependent Regulator Of Chromatin, Subfamily A, Member 4	Protein Coding	52	GC19P010932	7.42
Ischemic Stroke	IL1A	Interleukin 1 Alpha	Protein Coding	45	GC02M112773	7.42
Ischemic Stroke	MYH6	Myosin Heavy Chain 6	Protein Coding	47	GC14M023380	7.4
Ischemic Stroke	NOX4	NADPH Oxidase 4	Protein Coding	44	GC11M089324	7.37
Ischemic Stroke	HSD11B1	Hydroxysteroid 11-Beta Dehydrogenase 1	Protein Coding	51	GC01P209686	7.36
Ischemic Stroke	LPXN	Leupaxin	Protein Coding	41	GC11M059798	7.36
Ischemic Stroke	DDAH1	Dimethylarginine Dimethylaminohydrolase 1	Protein Coding	44	GC01M085318	7.36
Ischemic Stroke	UMOD	Uromodulin	Protein Coding	43	GC16M020344	7.35
Ischemic Stroke	PSEN2	Presenilin 2	Protein Coding	51	GC01P226870	7.35
Ischemic Stroke	SAMHD1	SAM And HD Domain Containing Deoxynucleoside Triphosphate Triphosphohydrolase 1	Protein Coding	44	GC20M036890	7.35
Ischemic Stroke	MMD	Monocyte To Macrophage Differentiation Associated	Protein Coding	36	GC17M055392	7.33
Ischemic Stroke	CNTF	Ciliary Neurotrophic Factor	Protein Coding	43	GC11P058622	7.32
Ischemic Stroke	STAT5A	Signal Transducer And Activator Of Transcription 5A	Protein Coding	47	GC17P042287	7.31
Ischemic Stroke	CHGA	Chromogranin A	Protein Coding	44	GC14P092923	7.31
Ischemic Stroke	NTS	Neurotensin	Protein Coding	41	GC12P085876	7.29
Ischemic Stroke	CHAT	Choline O-Acetyltransferase	Protein Coding	49	GC10P049609	7.28
Ischemic Stroke	BLK	BLK Proto-Oncogene, Src Family Tyrosine Kinase	Protein Coding	52	GC08P011486	7.27
Ischemic Stroke	NPHS2	NPHS2 Stomatin Family Member, Podocin	Protein Coding	42	GC01M179519	7.26
Ischemic Stroke	MAPK14	Mitogen-Activated Protein Kinase 14	Protein Coding	53	GC06P046047	7.26
Ischemic Stroke	HNF1B	HNF1 Homeobox B	Protein Coding	46	GC17M037686	7.25
Ischemic Stroke	NPS	Neuropeptide S	Protein Coding	34	GC10P127549	7.25
Ischemic Stroke	CD68	CD68 Molecule	Protein Coding	41	GC17P007579	7.23
Ischemic Stroke	HSPD1	Heat Shock Protein Family D (Hsp60) Member 1	Protein Coding	49	GC02M197486	7.18
Ischemic Stroke	SHBG	Sex Hormone Binding Globulin	Protein Coding	43	GC17P007613	7.18
Ischemic Stroke	PPOX	Protoporphyrinogen Oxidase	Protein Coding	44	GC01P161167	7.17
Ischemic Stroke	MMACHC	Metabolism Of Cobalamin Associated C	Protein Coding	43	GC01P045500	7.17
Ischemic Stroke	TMEM67	Transmembrane Protein 67	Protein Coding	38	GC08P093754	7.17
Ischemic Stroke	C19orf12	Chromosome 19 Open Reading Frame 12	Protein Coding	37	GC19M029699	7.17
Ischemic Stroke	MGR2	Migraine, Familial Typical, Susceptibility To	Genetic Locus	3	GC0XU900032	7.17
Ischemic Stroke	MGR3	Migraine, Familial, With Or Without Aura, Susceptibility To	Genetic Locus	3	GC06U900014	7.17
Ischemic Stroke	MGR1	Migraine With Aura, Susceptibility To	Genetic Locus	3	GC04U901855	7.17
Ischemic Stroke	MGR8	Migraine, Susceptibility To, 8	Genetic Locus	2	GC05U901104	7.17
Ischemic Stroke	MGR12	Migraine, With Or Without Aura, Susceptibility To, 12	Genetic Locus	2	GC10U901155	7.17
Ischemic Stroke	FMR1	FMRP Translational Regulator 1	Protein Coding	46	GC0XP147912	7.17
Ischemic Stroke	BMP6	Bone Morphogenetic Protein 6	Protein Coding	45	GC06P007726	7.16
Ischemic Stroke	ALDH1A2	Aldehyde Dehydrogenase 1 Family Member A2	Protein Coding	48	GC15M059726	7.12
Ischemic Stroke	SLC8A1	Solute Carrier Family 8 Member A1	Protein Coding	45	GC02M040078	7.1
Ischemic Stroke	CTLA4	Cytotoxic T-Lymphocyte Associated Protein 4	Protein Coding	47	GC02P203867	7.1
Ischemic Stroke	BRAF	B-Raf Proto-Oncogene, Serine/Threonine Kinase	Protein Coding	55	GC07M140719	7.08
Ischemic Stroke	MIR124-1	MicroRNA 124-1	RNA Gene	21	GC08M009903	7.07
Ischemic Stroke	FUNDC2	FUN14 Domain Containing 2	Protein Coding	35	GC0XP155025	7.06
Ischemic Stroke	LRP5	LDL Receptor Related Protein 5	Protein Coding	50	GC11P068298	7.06
Ischemic Stroke	NPR1	Natriuretic Peptide Receptor 1	Protein Coding	46	GC01P153691	7.04
Ischemic Stroke	ADA	Adenosine Deaminase	Protein Coding	51	GC20M044620	7.04
Ischemic Stroke	ADRA1A	Adrenoceptor Alpha 1A	Protein Coding	48	GC08M026747	7.04
Ischemic Stroke	ACTC1	Actin Alpha Cardiac Muscle 1	Protein Coding	43	GC15M034788	7.02
Ischemic Stroke	GRIA3	Glutamate Ionotropic Receptor AMPA Type Subunit 3	Protein Coding	51	GC0XP123184	7.02
Ischemic Stroke	HCRT	Hypocretin Neuropeptide Precursor	Protein Coding	42	GC17M042185	7
Ischemic Stroke	F11	Coagulation Factor XI	Protein Coding	45	GC04P186265	7
Ischemic Stroke	ALOX12	Arachidonate 12-Lipoxygenase, 12S Type	Protein Coding	45	GC17P006995	6.95
Ischemic Stroke	TERT	Telomerase Reverse Transcriptase	Protein Coding	53	GC05M001253	6.94
Ischemic Stroke	PRTN3	Proteinase 3	Protein Coding	46	GC19P000840	6.93
Ischemic Stroke	SOD3	Superoxide Dismutase 3	Protein Coding	40	GC04P024798	6.91
Ischemic Stroke	PARP1	Poly(ADP-Ribose) Polymerase 1	Protein Coding	51	GC01M226360	6.89
Ischemic Stroke	GRM5	Glutamate Metabotropic Receptor 5	Protein Coding	48	GC11M088504	6.88
Ischemic Stroke	GRK2	G Protein-Coupled Receptor Kinase 2	Protein Coding	39	GC11P067266	6.85
Ischemic Stroke	FABP2	Fatty Acid Binding Protein 2	Protein Coding	44	GC04M119317	6.85
Ischemic Stroke	FGG	Fibrinogen Gamma Chain	Protein Coding	50	GC04M154604	6.84
Ischemic Stroke	DRD5	Dopamine Receptor D5	Protein Coding	47	GC04P009783	6.84
Ischemic Stroke	MIR199A1	MicroRNA 199a-1	RNA Gene	20	GC19M010792	6.83
Ischemic Stroke	GSN	Gelsolin	Protein Coding	50	GC09P121207	6.83
Ischemic Stroke	KLK1	Kallikrein 1	Protein Coding	45	GC19M050819	6.82
Ischemic Stroke	TF	Transferrin	Protein Coding	51	GC03P133666	6.81
Ischemic Stroke	OBSCN	Obscurin, Cytoskeletal Calmodulin And Titin-Interacting RhoGEF	Protein Coding	41	GC01P228208	6.8
Ischemic Stroke	KCNN4	Potassium Calcium-Activated Channel Subfamily N Member 4	Protein Coding	50	GC19M043767	6.79
Ischemic Stroke	ATP12A	ATPase H+/K+ Transporting Non-Gastric Alpha2 Subunit	Protein Coding	44	GC13P024680	6.74
Ischemic Stroke	ATP4A	ATPase H+/K+ Transporting Subunit Alpha	Protein Coding	42	GC19M041506	6.74
Ischemic Stroke	CPT2	Carnitine Palmitoyltransferase 2	Protein Coding	50	GC01P053196	6.72
Ischemic Stroke	TPM1	Tropomyosin 1	Protein Coding	50	GC15P072846	6.72
Ischemic Stroke	PRCP	Prolylcarboxypeptidase	Protein Coding	46	GC11M082758	6.72
Ischemic Stroke	RHOA	Ras Homolog Family Member A	Protein Coding	48	GC03M049359	6.71
Ischemic Stroke	ADCYAP1	Adenylate Cyclase Activating Polypeptide 1	Protein Coding	42	GC18P000895	6.71
Ischemic Stroke	CD177	CD177 Molecule	Protein Coding	40	GC19P043353	6.7
Ischemic Stroke	PFKM	Phosphofructokinase, Muscle	Protein Coding	51	GC12P048105	6.68
Ischemic Stroke	SELPLG	Selectin P Ligand	Protein Coding	44	GC12M108621	6.68
Ischemic Stroke	IGF2	Insulin Like Growth Factor 2	Protein Coding	49	GC11M002130	6.66
Ischemic Stroke	NPHS1	NPHS1 Adhesion Molecule, Nephrin	Protein Coding	47	GC19M035825	6.65
Ischemic Stroke	CHKB	Choline Kinase Beta	Protein Coding	47	GC22M050578	6.64
Ischemic Stroke	SOCS3	Suppressor Of Cytokine Signaling 3	Protein Coding	45	GC17M078356	6.63
Ischemic Stroke	SCN9A	Sodium Voltage-Gated Channel Alpha Subunit 9	Protein Coding	48	GC02M166195	6.6
Ischemic Stroke	CBSL	Cystathionine Beta-Synthase Like	Protein Coding	18	GC21M006445	6.58
Ischemic Stroke	KCNK3	Potassium Two Pore Domain Channel Subfamily K Member 3	Protein Coding	50	GC02P026692	6.57
Ischemic Stroke	WRN	WRN RecQ Like Helicase	Protein Coding	47	GC08P031033	6.57
Ischemic Stroke	CCK	Cholecystokinin	Protein Coding	42	GC03M042274	6.57
Ischemic Stroke	VEGFC	Vascular Endothelial Growth Factor C	Protein Coding	48	GC04M176683	6.55
Ischemic Stroke	EEF1A2	Eukaryotic Translation Elongation Factor 1 Alpha 2	Protein Coding	47	GC20M063488	6.55
Ischemic Stroke	NPPC	Natriuretic Peptide C	Protein Coding	41	GC02M231921	6.52
Ischemic Stroke	GLDC	Glycine Decarboxylase	Protein Coding	48	GC09M006522	6.5
Ischemic Stroke	KARS1	Lysyl-TRNA Synthetase 1	Protein Coding	39	GC16M075628	6.5
Ischemic Stroke	SNCA	Synuclein Alpha	Protein Coding	51	GC04M089724	6.49
Ischemic Stroke	UTS2	Urotensin 2	Protein Coding	42	GC01M007904	6.47
Ischemic Stroke	EDN3	Endothelin 3	Protein Coding	47	GC20P059300	6.47
Ischemic Stroke	IGFBP3	Insulin Like Growth Factor Binding Protein 3	Protein Coding	47	GC07M045912	6.47
Ischemic Stroke	CSN3	Casein Kappa	Protein Coding	36	GC04P070242	6.47
Ischemic Stroke	WNK3	WNK Lysine Deficient Protein Kinase 3	Protein Coding	40	GC0XM054193	6.46
Ischemic Stroke	NF1	Neurofibromin 1	Protein Coding	50	GC17P031007	6.45
Ischemic Stroke	ACADS	Acyl-CoA Dehydrogenase Short Chain	Protein Coding	47	GC12P120822	6.45
Ischemic Stroke	TLR9	Toll Like Receptor 9	Protein Coding	46	GC03M052222	6.45
Ischemic Stroke	PMS2	PMS1 Homolog 2, Mismatch Repair System Component	Protein Coding	50	GC07M005973	6.45
Ischemic Stroke	MAN2B1	Mannosidase Alpha Class 2B Member 1	Protein Coding	45	GC19M012663	6.45
Ischemic Stroke	GDAP1	Ganglioside Induced Differentiation Associated Protein 1	Protein Coding	43	GC08P074315	6.45
Ischemic Stroke	MIR92B	MicroRNA 92b	RNA Gene	17	GC01P155195	6.45
Ischemic Stroke	PRKN	Parkin RBR E3 Ubiquitin Protein Ligase	Protein Coding	41	GC06M161348	6.43
Ischemic Stroke	FAS	Fas Cell Surface Death Receptor	Protein Coding	52	GC10P088969	6.42
Ischemic Stroke	VIM	Vimentin	Protein Coding	51	GC10P017227	6.42
Ischemic Stroke	TFAM	Transcription Factor A, Mitochondrial	Protein Coding	45	GC10P058385	6.42
Ischemic Stroke	PCSK9	Proprotein Convertase Subtilisin/Kexin Type 9	Protein Coding	52	GC01P055039	6.4
Ischemic Stroke	CACNA1D	Calcium Voltage-Gated Channel Subunit Alpha1 D	Protein Coding	48	GC03P053328	6.4
Ischemic Stroke	TRAPPC9	Trafficking Protein Particle Complex 9	Protein Coding	40	GC08M139728	6.39
Ischemic Stroke	HLA-DRB1	Major Histocompatibility Complex, Class II, DR Beta 1	Protein Coding	47	GC06M032578	6.39
Ischemic Stroke	EZH2	Enhancer Of Zeste 2 Polycomb Repressive Complex 2 Subunit	Protein Coding	54	GC07M148807	6.39
Ischemic Stroke	NINJ2	Ninjurin 2	Protein Coding	37	GC12M000564	6.38
Ischemic Stroke	NFKB1	Nuclear Factor Kappa B Subunit 1	Protein Coding	54	GC04P102501	6.36
Ischemic Stroke	MIR24-1	MicroRNA 24-1	RNA Gene	20	GC09P095086	6.36
Ischemic Stroke	DFFA	DNA Fragmentation Factor Subunit Alpha	Protein Coding	47	GC01M010456	6.36
Ischemic Stroke	CPB2	Carboxypeptidase B2	Protein Coding	46	GC13M046053	6.35
Ischemic Stroke	IL1R1	Interleukin 1 Receptor Type 1	Protein Coding	47	GC02P102136	6.35
Ischemic Stroke	DKK1	Dickkopf WNT Signaling Pathway Inhibitor 1	Protein Coding	47	GC10P052314	6.35
Ischemic Stroke	SLC12A1	Solute Carrier Family 12 Member 1	Protein Coding	48	GC15P048191	6.34
Ischemic Stroke	ROCK2	Rho Associated Coiled-Coil Containing Protein Kinase 2	Protein Coding	49	GC02M011181	6.34
Ischemic Stroke	STAT5B	Signal Transducer And Activator Of Transcription 5B	Protein Coding	50	GC17M042199	6.33
Ischemic Stroke	PRDM10	PR/SET Domain 10	Protein Coding	35	GC11M129899	6.32
Ischemic Stroke	BMPR2	Bone Morphogenetic Protein Receptor Type 2	Protein Coding	51	GC02P202376	6.31
Ischemic Stroke	CACNA1B	Calcium Voltage-Gated Channel Subunit Alpha1 B	Protein Coding	49	GC09P137877	6.31
Ischemic Stroke	IDE	Insulin Degrading Enzyme	Protein Coding	50	GC10M092451	6.29
Ischemic Stroke	MT-ND3	Mitochondrially Encoded NADH:Ubiquinone Oxidoreductase Core Subunit 3	Protein Coding	32	GCMTP010061	6.27
Ischemic Stroke	ITIH4	Inter-Alpha-Trypsin Inhibitor Heavy Chain 4	Protein Coding	44	GC03M052812	6.27
Ischemic Stroke	SMARCAL1	SWI/SNF Related, Matrix Associated, Actin Dependent Regulator Of Chromatin, Subfamily A Like 1	Protein Coding	44	GC02P216412	6.25
Ischemic Stroke	UCP1	Uncoupling Protein 1	Protein Coding	45	GC04M140559	6.24
Ischemic Stroke	BAX	BCL2 Associated X, Apoptosis Regulator	Protein Coding	50	GC19P048954	6.23
Ischemic Stroke	NDUFA1	NADH:Ubiquinone Oxidoreductase Subunit A1	Protein Coding	45	GC0XP119871	6.23
Ischemic Stroke	TWNK	Twinkle MtDNA Helicase	Protein Coding	34	GC10P100994	6.23
Ischemic Stroke	SETD2	SET Domain Containing 2, Histone Lysine Methyltransferase	Protein Coding	47	GC03M047033	6.23
Ischemic Stroke	APOA4	Apolipoprotein A4	Protein Coding	43	GC11M116820	6.23
Ischemic Stroke	MT-ND2	Mitochondrially Encoded NADH:Ubiquinone Oxidoreductase Core Subunit 2	Protein Coding	33	GCMTP004472	6.22
Ischemic Stroke	SLC4A4	Solute Carrier Family 4 Member 4	Protein Coding	47	GC04P071063	6.22
Ischemic Stroke	TLR6	Toll Like Receptor 6	Protein Coding	45	GC04M038828	6.21
Ischemic Stroke	EGFR	Epidermal Growth Factor Receptor	Protein Coding	56	GC07P055019	6.21
Ischemic Stroke	ERCC6	ERCC Excision Repair 6, Chromatin Remodeling Factor	Protein Coding	46	GC10M049454	6.2
Ischemic Stroke	MMP7	Matrix Metallopeptidase 7	Protein Coding	50	GC11M102425	6.19
Ischemic Stroke	DDC	Dopa Decarboxylase	Protein Coding	53	GC07M050458	6.19
Ischemic Stroke	TARDBP	TAR DNA Binding Protein	Protein Coding	47	GC01P011013	6.18
Ischemic Stroke	PTPN11	Protein Tyrosine Phosphatase Non-Receptor Type 11	Protein Coding	55	GC12P112418	6.18
Ischemic Stroke	ABO	ABO, Alpha 1-3-N-Acetylgalactosaminyltransferase And Alpha 1-3-Galactosyltransferase	Protein Coding	39	GC09M133250	6.18
Ischemic Stroke	CD8A	CD8a Molecule	Protein Coding	48	GC02M086784	6.17
Ischemic Stroke	BMP2	Bone Morphogenetic Protein 2	Protein Coding	48	GC20P006696	6.13
Ischemic Stroke	HLA-DQB1	Major Histocompatibility Complex, Class II, DQ Beta 1	Protein Coding	45	GC06M032660	6.12
Ischemic Stroke	UTS2R	Urotensin 2 Receptor	Protein Coding	43	GC17P082374	6.12
Ischemic Stroke	SERPINA1	Serpin Family A Member 1	Protein Coding	51	GC14M094376	6.11
Ischemic Stroke	MIR221	MicroRNA 221	RNA Gene	21	GC0XM045746	6.11
Ischemic Stroke	M6PR	Mannose-6-Phosphate Receptor, Cation Dependent	Protein Coding	44	GC12M008951	6.07
Ischemic Stroke	ADIPOR2	Adiponectin Receptor 2	Protein Coding	44	GC12P001670	6.05
Ischemic Stroke	PCCA	Propionyl-CoA Carboxylase Subunit Alpha	Protein Coding	47	GC13P100089	6.04
Ischemic Stroke	NPTX2	Neuronal Pentraxin 2	Protein Coding	40	GC07P098620	6.03
Ischemic Stroke	ASTN2	Astrotactin 2	Protein Coding	37	GC09M116425	6.03
Ischemic Stroke	GH1	Growth Hormone 1	Protein Coding	46	GC17M063917	6.03
Ischemic Stroke	MMP12	Matrix Metallopeptidase 12	Protein Coding	45	GC11M102862	6.02
Ischemic Stroke	CRYAA	Crystallin Alpha A	Protein Coding	45	GC21P043169	6.01
Ischemic Stroke	CRLF1	Cytokine Receptor Like Factor 1	Protein Coding	42	GC19M018568	6.01
Ischemic Stroke	CMC4	C-X9-C Motif Containing 4	Protein Coding	30	GC0XM155061	6.01
Ischemic Stroke	OPRK1	Opioid Receptor Kappa 1	Protein Coding	46	GC08M053227	6.01
Ischemic Stroke	IL11	Interleukin 11	Protein Coding	43	GC19M055364	6.01
Ischemic Stroke	DNAH8	Dynein Axonemal Heavy Chain 8	Protein Coding	38	GC06P046078	6.01
Ischemic Stroke	DDAH2	Dimethylarginine Dimethylaminohydrolase 2	Protein Coding	44	GC06M031727	6
Ischemic Stroke	RARRES2	Retinoic Acid Receptor Responder 2	Protein Coding	41	GC07M150333	5.99
Ischemic Stroke	MT-ND4L	Mitochondrially Encoded NADH:Ubiquinone Oxidoreductase Core Subunit 4L	Protein Coding	29	GCMTP010472	5.96
Ischemic Stroke	IL5	Interleukin 5	Protein Coding	46	GC05M132541	5.95
Ischemic Stroke	CTSB	Cathepsin B	Protein Coding	52	GC08M011842	5.95
Ischemic Stroke	ITM2B	Integral Membrane Protein 2B	Protein Coding	44	GC13P048233	5.94
Ischemic Stroke	ABCC8	ATP Binding Cassette Subfamily C Member 8	Protein Coding	47	GC11M017392	5.94
Ischemic Stroke	TLR1	Toll Like Receptor 1	Protein Coding	49	GC04M038797	5.94
Ischemic Stroke	UGCG	UDP-Glucose Ceramide Glucosyltransferase	Protein Coding	43	GC09P111896	5.93
Ischemic Stroke	NFAT5	Nuclear Factor Of Activated T Cells 5	Protein Coding	44	GC16P069565	5.93
Ischemic Stroke	RPS27A	Ribosomal Protein S27a	Protein Coding	44	GC02P055231	5.89
Ischemic Stroke	SLC12A2	Solute Carrier Family 12 Member 2	Protein Coding	47	GC05P128083	5.87
Ischemic Stroke	SLC6A2	Solute Carrier Family 6 Member 2	Protein Coding	49	GC16P055656	5.85
Ischemic Stroke	CD163	CD163 Molecule	Protein Coding	44	GC12M007471	5.84
Ischemic Stroke	AMPD3	Adenosine Monophosphate Deaminase 3	Protein Coding	47	GC11P010309	5.84
Ischemic Stroke	IDH1	Isocitrate Dehydrogenase (NADP(+)) 1	Protein Coding	54	GC02M208236	5.84
Ischemic Stroke	KCNE2	Potassium Voltage-Gated Channel Subfamily E Regulatory Subunit 2	Protein Coding	41	GC21P034364	5.84
Ischemic Stroke	HLA-B	Major Histocompatibility Complex, Class I, B	Protein Coding	46	GC06M031289	5.83
Ischemic Stroke	TRPC6	Transient Receptor Potential Cation Channel Subfamily C Member 6	Protein Coding	50	GC11M101356	5.81
Ischemic Stroke	HLA-DRA	Major Histocompatibility Complex, Class II, DR Alpha	Protein Coding	48	GC06P032439	5.81
Ischemic Stroke	IQCB1	IQ Motif Containing B1	Protein Coding	42	GC03M121769	5.81
Ischemic Stroke	WNK4	WNK Lysine Deficient Protein Kinase 4	Protein Coding	45	GC17P043869	5.8
Ischemic Stroke	ADRA1B	Adrenoceptor Alpha 1B	Protein Coding	47	GC05P159867	5.8
Ischemic Stroke	PLAU	Plasminogen Activator, Urokinase	Protein Coding	53	GC10P073909	5.79
Ischemic Stroke	HBA2	Hemoglobin Subunit Alpha 2	Protein Coding	43	GC16P001213	5.78
Ischemic Stroke	SLC17A5	Solute Carrier Family 17 Member 5	Protein Coding	45	GC06M073593	5.78
Ischemic Stroke	HTR2C	5-Hydroxytryptamine Receptor 2C	Protein Coding	48	GC0XP114584	5.77
Ischemic Stroke	LGALS3	Galectin 3	Protein Coding	46	GC14P055124	5.77
Ischemic Stroke	GUCY1B1	Guanylate Cyclase 1 Soluble Subunit Beta 1	Protein Coding	35	GC04P155759	5.77
Ischemic Stroke	NRIP2	Nuclear Receptor Interacting Protein 2	Protein Coding	37	GC12M002824	5.77
Ischemic Stroke	ABCC6	ATP Binding Cassette Subfamily C Member 6	Protein Coding	46	GC16M016148	5.77
Ischemic Stroke	MIR222	MicroRNA 222	RNA Gene	21	GC0XM045747	5.76
Ischemic Stroke	TLR10	Toll Like Receptor 10	Protein Coding	42	GC04M038773	5.75
Ischemic Stroke	GDF15	Growth Differentiation Factor 15	Protein Coding	43	GC19P022252	5.75
Ischemic Stroke	CRYAB	Crystallin Alpha B	Protein Coding	47	GC11M111908	5.75
Ischemic Stroke	TSPAN2	Tetraspanin 2	Protein Coding	38	GC01M115050	5.75
Ischemic Stroke	MYOCD	Myocardin	Protein Coding	41	GC17P012665	5.74
Ischemic Stroke	PCCB	Propionyl-CoA Carboxylase Subunit Beta	Protein Coding	47	GC03P136250	5.73
Ischemic Stroke	SLC5A2	Solute Carrier Family 5 Member 2	Protein Coding	48	GC16P031499	5.72
Ischemic Stroke	CNBP	CCHC-Type Zinc Finger Nucleic Acid Binding Protein	Protein Coding	43	GC03M129167	5.72
Ischemic Stroke	LIN9	Lin-9 DREAM MuvB Core Complex Component	Protein Coding	38	GC01M226231	5.72
Ischemic Stroke	MIR423	MicroRNA 423	RNA Gene	18	GC17P030117	5.72
Ischemic Stroke	GAS5	Growth Arrest Specific 5	RNA Gene	24	GC01M174119	5.7
Ischemic Stroke	GUSB	Glucuronidase Beta	Protein Coding	48	GC07M065960	5.69
Ischemic Stroke	NISCH	Nischarin	Protein Coding	41	GC03P052455	5.68
Ischemic Stroke	LOC110806262	Solute Carrier Family 6 Member 4 Gene Promoter	Biological Region	2	GC17U902739	5.68
Ischemic Stroke	MIR27A	MicroRNA 27a	RNA Gene	22	GC19M013987	5.66
Ischemic Stroke	ATP1A1	ATPase Na+/K+ Transporting Subunit Alpha 1	Protein Coding	51	GC01P116372	5.65
Ischemic Stroke	LAMP1	Lysosomal Associated Membrane Protein 1	Protein Coding	44	GC13P113297	5.64
Ischemic Stroke	CALCR	Calcitonin Receptor	Protein Coding	48	GC07M093424	5.64
Ischemic Stroke	SLC2A1	Solute Carrier Family 2 Member 1	Protein Coding	54	GC01M042925	5.64
Ischemic Stroke	SLC7A1	Solute Carrier Family 7 Member 1	Protein Coding	45	GC13M029509	5.64
Ischemic Stroke	OPRD1	Opioid Receptor Delta 1	Protein Coding	44	GC01P028812	5.62
Ischemic Stroke	ADIPOR1	Adiponectin Receptor 1	Protein Coding	46	GC01M202940	5.62
Ischemic Stroke	CTH	Cystathionine Gamma-Lyase	Protein Coding	51	GC01P070411	5.61
Ischemic Stroke	MEF2D	Myocyte Enhancer Factor 2D	Protein Coding	45	GC01M156463	5.6
Ischemic Stroke	SHOC2	SHOC2 Leucine Rich Repeat Scaffold Protein	Protein Coding	43	GC10P110919	5.58
Ischemic Stroke	CRABP1	Cellular Retinoic Acid Binding Protein 1	Protein Coding	42	GC15P078340	5.58
Ischemic Stroke	PCLO	Piccolo Presynaptic Cytomatrix Protein	Protein Coding	41	GC07M082754	5.58
Ischemic Stroke	TRIM31	Tripartite Motif Containing 31	Protein Coding	39	GC06M030652	5.58
Ischemic Stroke	IRGC	Immunity Related GTPase Cinema	Protein Coding	37	GC19P043716	5.58
Ischemic Stroke	ANKRD13D	Ankyrin Repeat Domain 13D	Protein Coding	36	GC11P067288	5.58
Ischemic Stroke	ZXDC	ZXD Family Zinc Finger C	Protein Coding	36	GC03M126437	5.58
Ischemic Stroke	ZMYM5	Zinc Finger MYM-Type Containing 5	Protein Coding	35	GC13M019823	5.58
Ischemic Stroke	MMD2	Monocyte To Macrophage Differentiation Associated 2	Protein Coding	34	GC07M004892	5.58
Ischemic Stroke	KHDC1	KH Domain Containing 1	Protein Coding	33	GC06M073241	5.58
Ischemic Stroke	CCER2	Coiled-Coil Glutamate Rich Protein 2	Protein Coding	25	GC19M038908	5.58
Ischemic Stroke	DEFB133	Defensin Beta 133	Pseudogene	22	GC06M049946	5.58
Ischemic Stroke	LINC00316	Long Intergenic Non-Protein Coding RNA 316	RNA Gene	16	GC21M045338	5.58
Ischemic Stroke	LINC00351	Long Intergenic Non-Protein Coding RNA 351	RNA Gene	14	GC13P085363	5.58
Ischemic Stroke	SLC2A9	Solute Carrier Family 2 Member 9	Protein Coding	47	GC04M009772	5.57
Ischemic Stroke	NOX1	NADPH Oxidase 1	Protein Coding	43	GC0XM100843	5.57
Ischemic Stroke	ABL1	ABL Proto-Oncogene 1, Non-Receptor Tyrosine Kinase	Protein Coding	54	GC09P130713	5.56
Ischemic Stroke	IFNA2	Interferon Alpha 2	Protein Coding	42	GC09M021374	5.56
Ischemic Stroke	NCSTN	Nicastrin	Protein Coding	48	GC01P160343	5.5
Ischemic Stroke	PNOC	Prepronociceptin	Protein Coding	38	GC08P028316	5.5
Ischemic Stroke	DOCK8	Dedicator Of Cytokinesis 8	Protein Coding	44	GC09P000214	5.5
Ischemic Stroke	UQCRFS1	Ubiquinol-Cytochrome C Reductase, Rieske Iron-Sulfur Polypeptide 1	Protein Coding	44	GC19M029205	5.5
Ischemic Stroke	HHT3	Osler-Rendu-Weber Syndrome 3	Genetic Locus	2	GC05U901934	5.5
Ischemic Stroke	CCL21	C-C Motif Chemokine Ligand 21	Protein Coding	44	GC09M034709	5.5
Ischemic Stroke	STK24	Serine/Threonine Kinase 24	Protein Coding	45	GC13M098445	5.49
Ischemic Stroke	NEDD4L	NEDD4 Like E3 Ubiquitin Protein Ligase	Protein Coding	48	GC18P058044	5.47
Ischemic Stroke	ESM1	Endothelial Cell Specific Molecule 1	Protein Coding	40	GC05M054977	5.47
Ischemic Stroke	ANGPTL6	Angiopoietin Like 6	Protein Coding	40	GC19M010092	5.47
Ischemic Stroke	AQP2	Aquaporin 2	Protein Coding	48	GC12P049950	5.45
Ischemic Stroke	STK39	Serine/Threonine Kinase 39	Protein Coding	45	GC02M167954	5.45
Ischemic Stroke	GGT2	Gamma-Glutamyltransferase 2	Protein Coding	32	GC22M021207	5.45
Ischemic Stroke	PINK1	PTEN Induced Kinase 1	Protein Coding	48	GC01P020634	5.45
Ischemic Stroke	LAMA1	Laminin Subunit Alpha 1	Protein Coding	47	GC18M006941	5.45
Ischemic Stroke	ARG2	Arginase 2	Protein Coding	47	GC14P067619	5.41
Ischemic Stroke	PSAP	Prosaposin	Protein Coding	47	GC10M071816	5.41
Ischemic Stroke	FOXP2	Forkhead Box P2	Protein Coding	45	GC07P114086	5.41
Ischemic Stroke	ASIC3	Acid Sensing Ion Channel Subunit 3	Protein Coding	40	GC07P151048	5.41
Ischemic Stroke	LBP	Lipopolysaccharide Binding Protein	Protein Coding	45	GC20P038346	5.4
Ischemic Stroke	SCN10A	Sodium Voltage-Gated Channel Alpha Subunit 10	Protein Coding	47	GC03M038713	5.39
Ischemic Stroke	ATP2B3	ATPase Plasma Membrane Ca2+ Transporting 3	Protein Coding	47	GC0XP153517	5.39
Ischemic Stroke	LNPEP	Leucyl And Cystinyl Aminopeptidase	Protein Coding	46	GC05P096935	5.39
Ischemic Stroke	SAG	S-Antigen Visual Arrestin	Protein Coding	46	GC02P233309	5.39
Ischemic Stroke	CLCNKB	Chloride Voltage-Gated Channel Kb	Protein Coding	45	GC01P016043	5.39
Ischemic Stroke	ENPEP	Glutamyl Aminopeptidase	Protein Coding	44	GC04P110365	5.39
Ischemic Stroke	HNF1A	HNF1 Homeobox A	Protein Coding	47	GC12P120978	5.39
Ischemic Stroke	CAST	Calpastatin	Protein Coding	47	GC05P096525	5.36
Ischemic Stroke	ATP2B1	ATPase Plasma Membrane Ca2+ Transporting 1	Protein Coding	44	GC12M089588	5.36
Ischemic Stroke	PIGA	Phosphatidylinositol Glycan Anchor Biosynthesis Class A	Protein Coding	45	GC0XM015319	5.35
Ischemic Stroke	CRELD1	Cysteine Rich With EGF Like Domains 1	Protein Coding	40	GC03P009938	5.35
Ischemic Stroke	SUN1	Sad1 And UNC84 Domain Containing 1	Protein Coding	39	GC07P000857	5.33
Ischemic Stroke	IGF2R	Insulin Like Growth Factor 2 Receptor	Protein Coding	47	GC06P159969	5.33
Ischemic Stroke	MIR483	MicroRNA 483	RNA Gene	19	GC11M002178	5.32
Ischemic Stroke	TRPC3	Transient Receptor Potential Cation Channel Subfamily C Member 3	Protein Coding	50	GC04M121879	5.31
Ischemic Stroke	HSPA8	Heat Shock Protein Family A (Hsp70) Member 8	Protein Coding	48	GC11M123057	5.31
Ischemic Stroke	ATXN2	Ataxin 2	Protein Coding	47	GC12M111443	5.3
Ischemic Stroke	IDH2	Isocitrate Dehydrogenase (NADP(+)) 2	Protein Coding	53	GC15M090083	5.29
Ischemic Stroke	LAMP2	Lysosomal Associated Membrane Protein 2	Protein Coding	46	GC0XM120426	5.29
Ischemic Stroke	ASXL1	ASXL Transcriptional Regulator 1	Protein Coding	44	GC20P032359	5.29
Ischemic Stroke	NFE2	Nuclear Factor, Erythroid 2	Protein Coding	41	GC12M054292	5.29
Ischemic Stroke	HECTD4	HECT Domain E3 Ubiquitin Protein Ligase 4	Protein Coding	32	GC12M112160	5.29
Ischemic Stroke	SLC12A3	Solute Carrier Family 12 Member 3	Protein Coding	48	GC16P056865	5.28
Ischemic Stroke	KLHL3	Kelch Like Family Member 3	Protein Coding	43	GC05M137617	5.28
Ischemic Stroke	RGS2	Regulator Of G Protein Signaling 2	Protein Coding	44	GC01P192809	5.26
Ischemic Stroke	MMP13	Matrix Metallopeptidase 13	Protein Coding	51	GC11M102942	5.25
Ischemic Stroke	MAPK1	Mitogen-Activated Protein Kinase 1	Protein Coding	52	GC22M021754	5.24
Ischemic Stroke	RAC1	Rac Family Small GTPase 1	Protein Coding	51	GC07P006380	5.24
Ischemic Stroke	MYC	MYC Proto-Oncogene, BHLH Transcription Factor	Protein Coding	53	GC08P127735	5.23
Ischemic Stroke	PARK7	Parkinsonism Associated Deglycase	Protein Coding	47	GC01P007968	5.23
Ischemic Stroke	ABCC9	ATP Binding Cassette Subfamily C Member 9	Protein Coding	46	GC12M021797	5.23
Ischemic Stroke	KCNJ1	Potassium Inwardly Rectifying Channel Subfamily J Member 1	Protein Coding	48	GC11M128741	5.22
Ischemic Stroke	ADRA1D	Adrenoceptor Alpha 1D	Protein Coding	47	GC20M004220	5.22
Ischemic Stroke	PRSS8	Serine Protease 8	Protein Coding	45	GC16M031132	5.22
Ischemic Stroke	ATP6AP2	ATPase H+ Transporting Accessory Protein 2	Protein Coding	45	GC0XP040582	5.22
Ischemic Stroke	ATP1A4	ATPase Na+/K+ Transporting Subunit Alpha 4	Protein Coding	42	GC01P160151	5.22
Ischemic Stroke	ETV3	ETS Variant Transcription Factor 3	Protein Coding	36	GC01M157121	5.22
Ischemic Stroke	GGTLC3	Gamma-Glutamyltransferase Light Chain Family Member 3	Protein Coding	21	GC22M018516	5.22
Ischemic Stroke	MIR296	MicroRNA 296	RNA Gene	18	GC20M058817	5.22
Ischemic Stroke	NPR2	Natriuretic Peptide Receptor 2	Protein Coding	48	GC09P035755	5.22
Ischemic Stroke	PLA2G1B	Phospholipase A2 Group IB	Protein Coding	48	GC12M120322	5.21
Ischemic Stroke	SLC9A3	Solute Carrier Family 9 Member A3	Protein Coding	48	GC05M000472	5.19
Ischemic Stroke	IGFBP2	Insulin Like Growth Factor Binding Protein 2	Protein Coding	45	GC02P216632	5.19
Ischemic Stroke	RAMP2	Receptor Activity Modifying Protein 2	Protein Coding	42	GC17P042758	5.17
Ischemic Stroke	PRKD1	Protein Kinase D1	Protein Coding	51	GC14M029576	5.16
Ischemic Stroke	HMOX2	Heme Oxygenase 2	Protein Coding	49	GC16P004474	5.16
Ischemic Stroke	APCS	Amyloid P Component, Serum	Protein Coding	42	GC01P159587	5.16
Ischemic Stroke	SYNPO	Synaptopodin	Protein Coding	40	GC05P150601	5.16
Ischemic Stroke	PPP1R12A	Protein Phosphatase 1 Regulatory Subunit 12A	Protein Coding	42	GC12M079773	5.12
Ischemic Stroke	PNMT	Phenylethanolamine N-Methyltransferase	Protein Coding	45	GC17P039667	5.11
Ischemic Stroke	DMD	Dystrophin	Protein Coding	48	GC0XM031047	5.1
Ischemic Stroke	IL13	Interleukin 13	Protein Coding	46	GC05P132656	5.1
Ischemic Stroke	ALDH7A1	Aldehyde Dehydrogenase 7 Family Member A1	Protein Coding	48	GC05M126541	5.09
Ischemic Stroke	ARSH	Arylsulfatase Family Member H	Protein Coding	35	GC0XP003006	5.09
Ischemic Stroke	MIR26B	MicroRNA 26b	RNA Gene	22	GC02P218402	5.09
Ischemic Stroke	ARNTL	Aryl Hydrocarbon Receptor Nuclear Translocator Like	Protein Coding	44	GC11P013276	5.09
Ischemic Stroke	FIP1L1	Factor Interacting With PAPOLA And CPSF1	Protein Coding	39	GC04P053383	5.07
Ischemic Stroke	CR1	Complement C3b/C4b Receptor 1 (Knops Blood Group)	Protein Coding	45	GC01P207496	5.06
Ischemic Stroke	EDN2	Endothelin 2	Protein Coding	41	GC01M041478	5.05
Ischemic Stroke	CFH	Complement Factor H	Protein Coding	47	GC01P196621	5.04
Ischemic Stroke	CCL3	C-C Motif Chemokine Ligand 3	Protein Coding	41	GC17M036088	5.04
Ischemic Stroke	PSMB8	Proteasome 20S Subunit Beta 8	Protein Coding	51	GC06M032840	5.03
Ischemic Stroke	MAF	MAF BZIP Transcription Factor	Protein Coding	47	GC16M079212	5.03
Ischemic Stroke	SLC22A12	Solute Carrier Family 22 Member 12	Protein Coding	45	GC11P064609	5.03
Ischemic Stroke	KLK4	Kallikrein Related Peptidase 4	Protein Coding	44	GC19M050907	5.03
Ischemic Stroke	ADAM8	ADAM Metallopeptidase Domain 8	Protein Coding	44	GC10M133262	5.03
Ischemic Stroke	HPGDS	Hematopoietic Prostaglandin D Synthase	Protein Coding	43	GC04M094298	5.03
Ischemic Stroke	ICOSLG	Inducible T Cell Costimulator Ligand	Protein Coding	40	GC21M044222	5.03
Ischemic Stroke	HTN3	Histatin 3	Protein Coding	36	GC04P070028	5.03
Ischemic Stroke	OGA	O-GlcNAcase	Protein Coding	33	GC10M101785	5.03
Ischemic Stroke	MIR520A	MicroRNA 520a	RNA Gene	19	GC19P053690	5.03
Ischemic Stroke	ITGAL	Integrin Subunit Alpha L	Protein Coding	47	GC16P030472	5.03
Ischemic Stroke	TWIST1	Twist Family BHLH Transcription Factor 1	Protein Coding	46	GC07M019020	5.03
Ischemic Stroke	POLB	DNA Polymerase Beta	Protein Coding	48	GC08P042338	5.03
Ischemic Stroke	CFI	Complement Factor I	Protein Coding	48	GC04M109740	5.02
Ischemic Stroke	CCL17	C-C Motif Chemokine Ligand 17	Protein Coding	40	GC16P057399	5.01
Ischemic Stroke	TRPC1	Transient Receptor Potential Cation Channel Subfamily C Member 1	Protein Coding	43	GC03P142724	5
Ischemic Stroke	HFE	Homeostatic Iron Regulator	Protein Coding	45	GC06P026087	4.99
Ischemic Stroke	TGFA	Transforming Growth Factor Alpha	Protein Coding	48	GC02M070447	4.97
Ischemic Stroke	MYL4	Myosin Light Chain 4	Protein Coding	45	GC17P047189	4.97
Ischemic Stroke	NAGLU	N-Acetyl-Alpha-Glucosaminidase	Protein Coding	44	GC17P042535	4.95
Ischemic Stroke	NTRK1	Neurotrophic Receptor Tyrosine Kinase 1	Protein Coding	50	GC01P156786	4.95
Ischemic Stroke	IL4R	Interleukin 4 Receptor	Protein Coding	49	GC16P027325	4.95
Ischemic Stroke	GARS1	Glycyl-TRNA Synthetase 1	Protein Coding	37	GC07P030595	4.95
Ischemic Stroke	OPRL1	Opioid Related Nociceptin Receptor 1	Protein Coding	46	GC20P064080	4.94
Ischemic Stroke	ATFB5	Atrial Fibrillation, Familial, 5	Genetic Locus	3	GC04U900998	4.94
Ischemic Stroke	TACR1	Tachykinin Receptor 1	Protein Coding	47	GC02M075010	4.92
Ischemic Stroke	FAAH	Fatty Acid Amide Hydrolase	Protein Coding	48	GC01P046394	4.92
Ischemic Stroke	ADD2	Adducin 2	Protein Coding	42	GC02M070626	4.92
Ischemic Stroke	ITGB1	Integrin Subunit Beta 1	Protein Coding	51	GC10M032900	4.91
Ischemic Stroke	MIF	Macrophage Migration Inhibitory Factor	Protein Coding	51	GC22P023894	4.9
Ischemic Stroke	NCF2	Neutrophil Cytosolic Factor 2	Protein Coding	48	GC01M183524	4.9
Ischemic Stroke	P2RY2	Purinergic Receptor P2Y2	Protein Coding	47	GC11P073217	4.9
Ischemic Stroke	DUOX2	Dual Oxidase 2	Protein Coding	44	GC15M045092	4.9
Ischemic Stroke	RENBP	Renin Binding Protein	Protein Coding	42	GC0XM153935	4.9
Ischemic Stroke	NOX5	NADPH Oxidase 5	Protein Coding	39	GC15P071838	4.9
Ischemic Stroke	PLTP	Phospholipid Transfer Protein	Protein Coding	44	GC20M045898	4.9
Ischemic Stroke	TRPA1	Transient Receptor Potential Cation Channel Subfamily A Member 1	Protein Coding	45	GC08M072019	4.89
Ischemic Stroke	GRK4	G Protein-Coupled Receptor Kinase 4	Protein Coding	43	GC04P002967	4.89
Ischemic Stroke	TRPC5	Transient Receptor Potential Cation Channel Subfamily C Member 5	Protein Coding	41	GC0XM111774	4.89
Ischemic Stroke	ATPSCKMT	ATP Synthase C Subunit Lysine N-Methyltransferase	Protein Coding	28	GC05M010225	4.89
Ischemic Stroke	MYH7	Myosin Heavy Chain 7	Protein Coding	48	GC14M023412	4.89
Ischemic Stroke	ADAM17	ADAM Metallopeptidase Domain 17	Protein Coding	52	GC02M009488	4.84
Ischemic Stroke	HCK	HCK Proto-Oncogene, Src Family Tyrosine Kinase	Protein Coding	51	GC20P032052	4.84
Ischemic Stroke	KCNQ2	Potassium Voltage-Gated Channel Subfamily Q Member 2	Protein Coding	48	GC20M063400	4.84
Ischemic Stroke	SELENBP1	Selenium Binding Protein 1	Protein Coding	45	GC01M151364	4.84
Ischemic Stroke	BRD4	Bromodomain Containing 4	Protein Coding	45	GC19M015236	4.84
Ischemic Stroke	HSD3B1	Hydroxy-Delta-5-Steroid Dehydrogenase, 3 Beta- And Steroid Delta-Isomerase 1	Protein Coding	44	GC01P119507	4.84
Ischemic Stroke	SLC4A5	Solute Carrier Family 4 Member 5	Protein Coding	43	GC02M074217	4.84
Ischemic Stroke	DUOX1	Dual Oxidase 1	Protein Coding	42	GC15P045129	4.84
Ischemic Stroke	XPNPEP3	X-Prolyl Aminopeptidase 3	Protein Coding	42	GC22P040857	4.84
Ischemic Stroke	GNA15	G Protein Subunit Alpha 15	Protein Coding	41	GC19P003149	4.84
Ischemic Stroke	AGTRAP	Angiotensin II Receptor Associated Protein	Protein Coding	39	GC01P011736	4.84
Ischemic Stroke	ERAS	ES Cell Expressed Ras	Protein Coding	38	GC0XP048827	4.84
Ischemic Stroke	CYP4A22	Cytochrome P450 Family 4 Subfamily A Member 22	Protein Coding	36	GC01P047142	4.84
Ischemic Stroke	ATG9B	Autophagy Related 9B	Protein Coding	36	GC07M151012	4.84
Ischemic Stroke	SLC9B2	Solute Carrier Family 9 Member B2	Protein Coding	36	GC04M103019	4.84
Ischemic Stroke	ARSL	Arylsulfatase L	Protein Coding	34	GC0XM002934	4.84
Ischemic Stroke	ADIRF	Adipogenesis Regulatory Factor	Protein Coding	33	GC10P086968	4.84
Ischemic Stroke	BHLHE22	Basic Helix-Loop-Helix Family Member E22	Protein Coding	33	GC08P064580	4.84
Ischemic Stroke	HTN1	Histatin 1	Protein Coding	33	GC04P070053	4.84
Ischemic Stroke	C5orf38	Chromosome 5 Open Reading Frame 38	Protein Coding	31	GC05P002752	4.84
Ischemic Stroke	PCLAF	PCNA Clamp Associated Factor	Protein Coding	30	GC15M064549	4.84
Ischemic Stroke	EMX2OS	EMX2 Opposite Strand/Antisense RNA	RNA Gene	20	GC10M117473	4.84
Ischemic Stroke	MIR590	MicroRNA 590	RNA Gene	19	GC07P074191	4.84
Ischemic Stroke	MIR517A	MicroRNA 517a	RNA Gene	16	GC19P053712	4.84
Ischemic Stroke	LINC01227	Long Intergenic Non-Protein Coding RNA 1227	RNA Gene	13	GC16M080566	4.84
Ischemic Stroke	NAGA	Alpha-N-Acetylgalactosaminidase	Protein Coding	44	GC22M042058	4.83
Ischemic Stroke	XBP1	X-Box Binding Protein 1	Protein Coding	47	GC22M028794	4.83
Ischemic Stroke	ASIC1	Acid Sensing Ion Channel Subunit 1	Protein Coding	44	GC12P050057	4.8
Ischemic Stroke	VCP	Valosin Containing Protein	Protein Coding	50	GC09M035056	4.79
Ischemic Stroke	LTC4S	Leukotriene C4 Synthase	Protein Coding	43	GC05P179793	4.78
Ischemic Stroke	CACNA1S	Calcium Voltage-Gated Channel Subunit Alpha1 S	Protein Coding	48	GC01M201008	4.77
Ischemic Stroke	PES1	Pescadillo Ribosomal Biogenesis Factor 1	Protein Coding	39	GC22M030576	4.76
Ischemic Stroke	SNAP25	Synaptosome Associated Protein 25	Protein Coding	51	GC20P010218	4.76
Ischemic Stroke	VIPR2	Vasoactive Intestinal Peptide Receptor 2	Protein Coding	45	GC07M159028	4.76
Ischemic Stroke	FOXP3	Forkhead Box P3	Protein Coding	48	GC0XM049250	4.75
Ischemic Stroke	OSM	Oncostatin M	Protein Coding	44	GC22M030262	4.73
Ischemic Stroke	F13B	Coagulation Factor XIII B Chain	Protein Coding	41	GC01M197008	4.73
Ischemic Stroke	G6PD	Glucose-6-Phosphate Dehydrogenase	Protein Coding	52	GC0XM154531	4.72
Ischemic Stroke	IL6R	Interleukin 6 Receptor	Protein Coding	50	GC01P154405	4.71
Ischemic Stroke	CACNB4	Calcium Voltage-Gated Channel Auxiliary Subunit Beta 4	Protein Coding	47	GC02M151832	4.71
Ischemic Stroke	TBXAS1	Thromboxane A Synthase 1	Protein Coding	51	GC07P139777	4.7
Ischemic Stroke	PTPRC	Protein Tyrosine Phosphatase Receptor Type C	Protein Coding	52	GC01P198607	4.69
Ischemic Stroke	EMD	Emerin	Protein Coding	47	GC0XP154379	4.69
Ischemic Stroke	TPH1	Tryptophan Hydroxylase 1	Protein Coding	45	GC11M018040	4.69
Ischemic Stroke	CACNA1H	Calcium Voltage-Gated Channel Subunit Alpha1 H	Protein Coding	51	GC16P001153	4.69
Ischemic Stroke	CARD8	Caspase Recruitment Domain Family Member 8	Protein Coding	40	GC19M048181	4.67
Ischemic Stroke	GPX3	Glutathione Peroxidase 3	Protein Coding	46	GC05P150997	4.66
Ischemic Stroke	GCH1	GTP Cyclohydrolase 1	Protein Coding	47	GC14M054842	4.66
Ischemic Stroke	SCN3A	Sodium Voltage-Gated Channel Alpha Subunit 3	Protein Coding	48	GC02M165087	4.63
Ischemic Stroke	ASL	Argininosuccinate Lyase	Protein Coding	48	GC07P066075	4.63
Ischemic Stroke	LMNB1	Lamin B1	Protein Coding	48	GC05P126776	4.63
Ischemic Stroke	PSENEN	Presenilin Enhancer, Gamma-Secretase Subunit	Protein Coding	45	GC19P037726	4.63
Ischemic Stroke	TRPM8	Transient Receptor Potential Cation Channel Subfamily M Member 8	Protein Coding	44	GC02P233917	4.63
Ischemic Stroke	SCN11A	Sodium Voltage-Gated Channel Alpha Subunit 11	Protein Coding	43	GC03M038862	4.63
Ischemic Stroke	CXCL9	C-X-C Motif Chemokine Ligand 9	Protein Coding	40	GC04M076001	4.63
Ischemic Stroke	PRRT2	Proline Rich Transmembrane Protein 2	Protein Coding	40	GC16P029811	4.63
Ischemic Stroke	LIPN	Lipase Family Member N	Protein Coding	37	GC10P088760	4.63
Ischemic Stroke	ACP5	Acid Phosphatase 5, Tartrate Resistant	Protein Coding	48	GC19M011574	4.62
Ischemic Stroke	CD55	CD55 Molecule (Cromer Blood Group)	Protein Coding	48	GC01P207321	4.62
Ischemic Stroke	BCR	BCR Activator Of RhoGEF And GTPase	Protein Coding	53	GC22P023179	4.61
Ischemic Stroke	PTPN22	Protein Tyrosine Phosphatase Non-Receptor Type 22	Protein Coding	48	GC01M113813	4.6
Ischemic Stroke	MIR196A2	MicroRNA 196a-2	RNA Gene	22	GC12P054167	4.59
Ischemic Stroke	HTT	Huntingtin	Protein Coding	45	GC04P003041	4.59
Ischemic Stroke	HRH3	Histamine Receptor H3	Protein Coding	43	GC20M062214	4.58
Ischemic Stroke	KALRN	Kalirin RhoGEF Kinase	Protein Coding	43	GC03P124033	4.57
Ischemic Stroke	IL2RA	Interleukin 2 Receptor Subunit Alpha	Protein Coding	52	GC10M006010	4.56
Ischemic Stroke	CHEK2	Checkpoint Kinase 2	Protein Coding	55	GC22M028687	4.56
Ischemic Stroke	FUCA1	Alpha-L-Fucosidase 1	Protein Coding	47	GC01M023845	4.56
Ischemic Stroke	SPG7	SPG7 Matrix AAA Peptidase Subunit, Paraplegin	Protein Coding	44	GC16P089492	4.56
Ischemic Stroke	A4GALT	Alpha 1,4-Galactosyltransferase (P Blood Group)	Protein Coding	44	GC22M042692	4.56
Ischemic Stroke	U2AF1	U2 Small Nuclear RNA Auxiliary Factor 1	Protein Coding	42	GC21M043092	4.56
Ischemic Stroke	LIF	LIF Interleukin 6 Family Cytokine	Protein Coding	44	GC22M030240	4.54
Ischemic Stroke	AHSG	Alpha 2-HS Glycoprotein	Protein Coding	45	GC03P186612	4.54
Ischemic Stroke	IL5RA	Interleukin 5 Receptor Subunit Alpha	Protein Coding	47	GC03M003066	4.54
Ischemic Stroke	NKX2-5	NK2 Homeobox 5	Protein Coding	46	GC05M173232	4.5
Ischemic Stroke	LBR	Lamin B Receptor	Protein Coding	49	GC01M225401	4.49
Ischemic Stroke	SQSTM1	Sequestosome 1	Protein Coding	50	GC05P179806	4.49
Ischemic Stroke	CS	Citrate Synthase	Protein Coding	45	GC12M056271	4.48
Ischemic Stroke	SCN4A	Sodium Voltage-Gated Channel Alpha Subunit 4	Protein Coding	45	GC17M063938	4.46
Ischemic Stroke	APAF1	Apoptotic Peptidase Activating Factor 1	Protein Coding	48	GC12P098645	4.45
Ischemic Stroke	GHRH	Growth Hormone Releasing Hormone	Protein Coding	41	GC20M037251	4.45
Ischemic Stroke	MIR149	MicroRNA 149	RNA Gene	21	GC02P240456	4.44
Ischemic Stroke	TFPI	Tissue Factor Pathway Inhibitor	Protein Coding	46	GC02M187464	4.44
Ischemic Stroke	AIFM1	Apoptosis Inducing Factor Mitochondria Associated 1	Protein Coding	51	GC0XM130129	4.44
Ischemic Stroke	SDHB	Succinate Dehydrogenase Complex Iron Sulfur Subunit B	Protein Coding	49	GC01M017020	4.44
Ischemic Stroke	CASQ1	Calsequestrin 1	Protein Coding	45	GC01P160190	4.44
Ischemic Stroke	HTR2B	5-Hydroxytryptamine Receptor 2B	Protein Coding	44	GC02M231108	4.44
Ischemic Stroke	AQP1	Aquaporin 1 (Colton Blood Group)	Protein Coding	47	GC07P030911	4.43
Ischemic Stroke	PYGM	Glycogen Phosphorylase, Muscle Associated	Protein Coding	47	GC11M064746	4.42
Ischemic Stroke	MMP10	Matrix Metallopeptidase 10	Protein Coding	48	GC11M102770	4.41
Ischemic Stroke	PRPS1	Phosphoribosyl Pyrophosphate Synthetase 1	Protein Coding	45	GC0XP107628	4.4
Ischemic Stroke	LMNB2	Lamin B2	Protein Coding	45	GC19M002435	4.4
Ischemic Stroke	SUN2	Sad1 And UNC84 Domain Containing 2	Protein Coding	38	GC22M044549	4.4
Ischemic Stroke	KCNK18	Potassium Two Pore Domain Channel Subfamily K Member 18	Protein Coding	37	GC10P117197	4.4
Ischemic Stroke	MDM2	MDM2 Proto-Oncogene	Protein Coding	54	GC12P068808	4.4
Ischemic Stroke	DPYSL5	Dihydropyrimidinase Like 5	Protein Coding	38	GC02P026847	4.4
Ischemic Stroke	ACADM	Acyl-CoA Dehydrogenase Medium Chain	Protein Coding	48	GC01P075724	4.39
Ischemic Stroke	MOG	Myelin Oligodendrocyte Glycoprotein	Protein Coding	47	GC06P033153	4.37
Ischemic Stroke	ARSB	Arylsulfatase B	Protein Coding	45	GC05M078777	4.37
Ischemic Stroke	SORT1	Sortilin 1	Protein Coding	44	GC01M109310	4.36
Ischemic Stroke	P2RX2	Purinergic Receptor P2X 2	Protein Coding	44	GC12P132618	4.36
Ischemic Stroke	ADAMTSL1	ADAMTS Like 1	Protein Coding	42	GC09P017906	4.35
Ischemic Stroke	IL12A	Interleukin 12A	Protein Coding	45	GC03P159988	4.34
Ischemic Stroke	ITLN1	Intelectin 1	Protein Coding	40	GC01M160876	4.32
Ischemic Stroke	GATA1	GATA Binding Protein 1	Protein Coding	47	GC0XP048786	4.31
Ischemic Stroke	ACTN4	Actinin Alpha 4	Protein Coding	47	GC19P038647	4.31
Ischemic Stroke	SOST	Sclerostin	Protein Coding	45	GC17M043753	4.31
Ischemic Stroke	HTR1B	5-Hydroxytryptamine Receptor 1B	Protein Coding	45	GC06M077481	4.29
Ischemic Stroke	HSPB6	Heat Shock Protein Family B (Small) Member 6	Protein Coding	40	GC19M041410	4.28
Ischemic Stroke	PANX1	Pannexin 1	Protein Coding	44	GC11P094128	4.27
Ischemic Stroke	CASP8	Caspase 8	Protein Coding	54	GC02P201233	4.27
Ischemic Stroke	HMGCL	3-Hydroxy-3-Methylglutaryl-CoA Lyase	Protein Coding	48	GC01M023801	4.26
Ischemic Stroke	INO80	INO80 Complex ATPase Subunit	Protein Coding	37	GC15M040979	4.26
Ischemic Stroke	XRCC1	X-Ray Repair Cross Complementing 1	Protein Coding	45	GC19M043543	4.25
Ischemic Stroke	SOCS2	Suppressor Of Cytokine Signaling 2	Protein Coding	45	GC12P093569	4.25
Ischemic Stroke	MMRN1	Multimerin 1	Protein Coding	40	GC04P089879	4.25
Ischemic Stroke	LEPQTL1	Leptin, Serum Levels Of	Genetic Locus	4	GC02U903086	4.25
Ischemic Stroke	KCNA1	Potassium Voltage-Gated Channel Subfamily A Member 1	Protein Coding	47	GC12P006584	4.24
Ischemic Stroke	ACADVL	Acyl-CoA Dehydrogenase Very Long Chain	Protein Coding	47	GC17P007219	4.24
Ischemic Stroke	SIRT6	Sirtuin 6	Protein Coding	47	GC19M004174	4.24
Ischemic Stroke	HADHA	Hydroxyacyl-CoA Dehydrogenase Trifunctional Multienzyme Complex Subunit Alpha	Protein Coding	47	GC02M026190	4.24
Ischemic Stroke	SGCB	Sarcoglycan Beta	Protein Coding	41	GC04M052019	4.23
Ischemic Stroke	VHL	Von Hippel-Lindau Tumor Suppressor	Protein Coding	47	GC03P010205	4.23
Ischemic Stroke	IFNB1	Interferon Beta 1	Protein Coding	43	GC09M021077	4.22
Ischemic Stroke	P2RY1	Purinergic Receptor P2Y1	Protein Coding	45	GC03P152835	4.22
Ischemic Stroke	VLDLR	Very Low Density Lipoprotein Receptor	Protein Coding	49	GC09P002611	4.22
Ischemic Stroke	EGFL7	EGF Like Domain Multiple 7	Protein Coding	39	GC09P136658	4.22
Ischemic Stroke	P2RX3	Purinergic Receptor P2X 3	Protein Coding	42	GC11P057356	4.22
Ischemic Stroke	SYNE1	Spectrin Repeat Containing Nuclear Envelope Protein 1	Protein Coding	42	GC06M152121	4.22
Ischemic Stroke	GRIK2	Glutamate Ionotropic Receptor Kainate Type Subunit 2	Protein Coding	48	GC06P101181	4.2
Ischemic Stroke	MIR499A	MicroRNA 499a	RNA Gene	22	GC20P034990	4.19
Ischemic Stroke	PDGFB	Platelet Derived Growth Factor Subunit B	Protein Coding	51	GC22M044780	4.19
Ischemic Stroke	TXN	Thioredoxin	Protein Coding	47	GC09M110243	4.17
Ischemic Stroke	SP1	Sp1 Transcription Factor	Protein Coding	45	GC12P053380	4.17
Ischemic Stroke	ADAM10	ADAM Metallopeptidase Domain 10	Protein Coding	54	GC15M058588	4.17
Ischemic Stroke	SIRT2	Sirtuin 2	Protein Coding	50	GC19M038878	4.16
Ischemic Stroke	YY1	YY1 Transcription Factor	Protein Coding	49	GC14P100238	4.16
Ischemic Stroke	SV2A	Synaptic Vesicle Glycoprotein 2A	Protein Coding	44	GC01M149903	4.16
Ischemic Stroke	APH1A	Aph-1 Homolog A, Gamma-Secretase Subunit	Protein Coding	44	GC01M150265	4.16
Ischemic Stroke	PICALM	Phosphatidylinositol Binding Clathrin Assembly Protein	Protein Coding	44	GC11M085957	4.16
Ischemic Stroke	PNKD	PNKD Metallo-Beta-Lactamase Domain Containing	Protein Coding	43	GC02P218270	4.16
Ischemic Stroke	LAPTM4A	Lysosomal Protein Transmembrane 4 Alpha	Protein Coding	39	GC02M020032	4.16
Ischemic Stroke	MEG3	Maternally Expressed 3	RNA Gene	29	GC14P104431	4.16
Ischemic Stroke	HOTAIR	HOX Transcript Antisense RNA	RNA Gene	25	GC12M053962	4.16
Ischemic Stroke	THBS1	Thrombospondin 1	Protein Coding	45	GC15P039581	4.13
Ischemic Stroke	CKB	Creatine Kinase B	Protein Coding	47	GC14M103519	4.13
Ischemic Stroke	PON3	Paraoxonase 3	Protein Coding	45	GC07M095359	4.12
Ischemic Stroke	NTRK2	Neurotrophic Receptor Tyrosine Kinase 2	Protein Coding	55	GC09P084668	4.12
Ischemic Stroke	AKR1B1	Aldo-Keto Reductase Family 1 Member B	Protein Coding	49	GC07M134442	4.11
Ischemic Stroke	KITLG	KIT Ligand	Protein Coding	45	GC12M088492	4.11
Ischemic Stroke	NPC1	NPC Intracellular Cholesterol Transporter 1	Protein Coding	48	GC18M023506	4.11
Ischemic Stroke	CD79A	CD79a Molecule	Protein Coding	48	GC19P041877	4.1
Ischemic Stroke	ITGA4	Integrin Subunit Alpha 4	Protein Coding	50	GC02P181456	4.09
Ischemic Stroke	WT1	WT1 Transcription Factor	Protein Coding	50	GC11M032365	4.09
Ischemic Stroke	SREBF2	Sterol Regulatory Element Binding Transcription Factor 2	Protein Coding	44	GC22P041833	4.07
Ischemic Stroke	IL9	Interleukin 9	Protein Coding	45	GC05M135891	4.06
Ischemic Stroke	KCNK17	Potassium Two Pore Domain Channel Subfamily K Member 17	Protein Coding	37	GC06M041326	4.06
Ischemic Stroke	LIMK1	LIM Domain Kinase 1	Protein Coding	51	GC07P074082	4.06
Ischemic Stroke	RYR1	Ryanodine Receptor 1	Protein Coding	48	GC19P038434	4.06
Ischemic Stroke	RAMP1	Receptor Activity Modifying Protein 1	Protein Coding	44	GC02P237858	4.05
Ischemic Stroke	SLC19A1	Solute Carrier Family 19 Member 1	Protein Coding	47	GC21M045493	4.03
Ischemic Stroke	HCRTR2	Hypocretin Receptor 2	Protein Coding	44	GC06P055106	4.02
Ischemic Stroke	CAV2	Caveolin 2	Protein Coding	44	GC07P116287	4.02
Ischemic Stroke	IGFBP1	Insulin Like Growth Factor Binding Protein 1	Protein Coding	45	GC07P046473	4
Ischemic Stroke	PPARGC1A	PPARG Coactivator 1 Alpha	Protein Coding	48	GC04M023755	4
Ischemic Stroke	H2AX	H2A.X Variant Histone	Protein Coding	37	GC11M119097	3.99
Ischemic Stroke	DNM1L	Dynamin 1 Like	Protein Coding	48	GC12P032679	3.99
Ischemic Stroke	HLCS	Holocarboxylase Synthetase	Protein Coding	44	GC21M036750	3.99
Ischemic Stroke	RUNX2	RUNX Family Transcription Factor 2	Protein Coding	48	GC06P045327	3.99
Ischemic Stroke	JPH3	Junctophilin 3	Protein Coding	42	GC16P087601	3.98
Ischemic Stroke	TNFSF11	TNF Superfamily Member 11	Protein Coding	49	GC13P042562	3.97
Ischemic Stroke	POU4F1	POU Class 4 Homeobox 1	Protein Coding	39	GC13M078598	3.97
Ischemic Stroke	ABCG2	ATP Binding Cassette Subfamily G Member 2 (Junior Blood Group)	Protein Coding	52	GC04M088090	3.97
Ischemic Stroke	CHRNA7	Cholinergic Receptor Nicotinic Alpha 7 Subunit	Protein Coding	47	GC15P031923	3.96
Ischemic Stroke	RNASE3	Ribonuclease A Family Member 3	Protein Coding	41	GC14P020891	3.95
Ischemic Stroke	HTR7	5-Hydroxytryptamine Receptor 7	Protein Coding	47	GC10M090740	3.95
Ischemic Stroke	CD69	CD69 Molecule	Protein Coding	42	GC12M013363	3.95
Ischemic Stroke	KCNK4	Potassium Two Pore Domain Channel Subfamily K Member 4	Protein Coding	41	GC11P064292	3.95
Ischemic Stroke	FIS1	Fission, Mitochondrial 1	Protein Coding	40	GC07M101239	3.95
Ischemic Stroke	MIR22	MicroRNA 22	RNA Gene	20	GC17M001713	3.95
Ischemic Stroke	VIPR1	Vasoactive Intestinal Peptide Receptor 1	Protein Coding	47	GC03P042490	3.95
Ischemic Stroke	FBLN5	Fibulin 5	Protein Coding	45	GC14M091869	3.95
Ischemic Stroke	SUMF1	Sulfatase Modifying Factor 1	Protein Coding	44	GC03M003700	3.95
Ischemic Stroke	LGMN	Legumain	Protein Coding	44	GC14M092703	3.95
Ischemic Stroke	SYNE2	Spectrin Repeat Containing Nuclear Envelope Protein 2	Protein Coding	40	GC14P063852	3.95
Ischemic Stroke	MIR34A	MicroRNA 34a	RNA Gene	22	GC01M009151	3.94
Ischemic Stroke	GRIK1	Glutamate Ionotropic Receptor Kainate Type Subunit 1	Protein Coding	47	GC21M029536	3.94
Ischemic Stroke	P2RX4	Purinergic Receptor P2X 4	Protein Coding	44	GC12P122632	3.94
Ischemic Stroke	IVD	Isovaleryl-CoA Dehydrogenase	Protein Coding	46	GC15P040405	3.92
Ischemic Stroke	UCHL1	Ubiquitin C-Terminal Hydrolase L1	Protein Coding	53	GC04P041256	3.92
Ischemic Stroke	HELLS	Helicase, Lymphoid Specific	Protein Coding	45	GC10P094501	3.9
Ischemic Stroke	CX3CL1	C-X3-C Motif Chemokine Ligand 1	Protein Coding	44	GC16P057372	3.9
Ischemic Stroke	GRIN1	Glutamate Ionotropic Receptor NMDA Type Subunit 1	Protein Coding	51	GC09P137138	3.89
Ischemic Stroke	PRKDC	Protein Kinase, DNA-Activated, Catalytic Subunit	Protein Coding	51	GC08M047773	3.89
Ischemic Stroke	PAH	Phenylalanine Hydroxylase	Protein Coding	50	GC12M102836	3.89
Ischemic Stroke	KCNQ3	Potassium Voltage-Gated Channel Subfamily Q Member 3	Protein Coding	47	GC08M132120	3.89
Ischemic Stroke	HTR1D	5-Hydroxytryptamine Receptor 1D	Protein Coding	47	GC01M023191	3.89
Ischemic Stroke	CSTA	Cystatin A	Protein Coding	45	GC03P122325	3.89
Ischemic Stroke	ANK3	Ankyrin 3	Protein Coding	45	GC10M060026	3.89
Ischemic Stroke	TP53BP1	Tumor Protein P53 Binding Protein 1	Protein Coding	45	GC15M043403	3.89
Ischemic Stroke	BANF1	BAF Nuclear Assembly Factor 1	Protein Coding	43	GC11P066002	3.89
Ischemic Stroke	TWIST2	Twist Family BHLH Transcription Factor 2	Protein Coding	43	GC02P238848	3.89
Ischemic Stroke	LTBP4	Latent Transforming Growth Factor Beta Binding Protein 4	Protein Coding	41	GC19P040592	3.89
Ischemic Stroke	CST5	Cystatin D	Protein Coding	40	GC20M023875	3.89
Ischemic Stroke	CST7	Cystatin F	Protein Coding	39	GC20P024949	3.89
Ischemic Stroke	RCE1	Ras Converting CAAX Endopeptidase 1	Protein Coding	39	GC11P066842	3.89
Ischemic Stroke	COX14	Cytochrome C Oxidase Assembly Factor COX14	Protein Coding	37	GC12P050111	3.89
Ischemic Stroke	CST4	Cystatin S	Protein Coding	37	GC20M023685	3.89
Ischemic Stroke	SLC39A2	Solute Carrier Family 39 Member 2	Protein Coding	37	GC14P021146	3.89
Ischemic Stroke	INSL6	Insulin Like 6	Protein Coding	36	GC09M004991	3.89
Ischemic Stroke	MTRNR2L5	MT-RNR2 Like 5	Protein Coding	20	GC10P055598	3.89
Ischemic Stroke	MIR133A1	MicroRNA 133a-1	RNA Gene	18	GC18M021826	3.89
Ischemic Stroke	WFDC21P	WAP Four-Disulfide Core Domain 21, Pseudogene	Pseudogene	13	GC17M060085	3.89
Ischemic Stroke	CYP1A1	Cytochrome P450 Family 1 Subfamily A Member 1	Protein Coding	48	GC15M074719	3.87
Ischemic Stroke	ANK1	Ankyrin 1	Protein Coding	44	GC08M041653	3.87
Ischemic Stroke	IGF1R	Insulin Like Growth Factor 1 Receptor	Protein Coding	56	GC15P098648	3.86
Ischemic Stroke	BRAP	BRCA1 Associated Protein	Protein Coding	42	GC12M111642	3.86
Ischemic Stroke	TNFSF10	TNF Superfamily Member 10	Protein Coding	48	GC03M172505	3.85
Ischemic Stroke	DEFA1	Defensin Alpha 1	Protein Coding	40	GC08M006977	3.81
Ischemic Stroke	FASLG	Fas Ligand	Protein Coding	49	GC01P172628	3.81
Ischemic Stroke	KCNK2	Potassium Two Pore Domain Channel Subfamily K Member 2	Protein Coding	42	GC01P215005	3.8
Ischemic Stroke	MFN1	Mitofusin 1	Protein Coding	43	GC03P179347	3.8
Ischemic Stroke	FABP12	Fatty Acid Binding Protein 12	Protein Coding	31	GC08M081524	3.8
Ischemic Stroke	CAMK2G	Calcium/Calmodulin Dependent Protein Kinase II Gamma	Protein Coding	48	GC10M073812	3.8
Ischemic Stroke	CELSR1	Cadherin EGF LAG Seven-Pass G-Type Receptor 1	Protein Coding	43	GC22M046360	3.8
Ischemic Stroke	MIR134	MicroRNA 134	RNA Gene	19	GC14P104437	3.8
Ischemic Stroke	STIN2-VNTR	Serotonin Transporter Intronic VNTR Enhancer	Biological Region	2	GC17U902737	3.79
Ischemic Stroke	EPHB4	EPH Receptor B4	Protein Coding	52	GC07M100803	3.78
Ischemic Stroke	CSF1	Colony Stimulating Factor 1	Protein Coding	45	GC01P109911	3.77
Ischemic Stroke	PPARD	Peroxisome Proliferator Activated Receptor Delta	Protein Coding	48	GC06P046031	3.77
Ischemic Stroke	MYBPC1	Myosin Binding Protein C1	Protein Coding	45	GC12P101568	3.76
Ischemic Stroke	MASP2	Mannan Binding Lectin Serine Peptidase 2	Protein Coding	45	GC01M011026	3.76
Ischemic Stroke	NR1H3	Nuclear Receptor Subfamily 1 Group H Member 3	Protein Coding	48	GC11P047248	3.76
Ischemic Stroke	SCGB1A1	Secretoglobin Family 1A Member 1	Protein Coding	41	GC11P062405	3.75
Ischemic Stroke	TIE1	Tyrosine Kinase With Immunoglobulin Like And EGF Like Domains 1	Protein Coding	44	GC01P043300	3.74
Ischemic Stroke	GRIA1	Glutamate Ionotropic Receptor AMPA Type Subunit 1	Protein Coding	50	GC05P153467	3.72
Ischemic Stroke	PCNA	Proliferating Cell Nuclear Antigen	Protein Coding	52	GC20M005114	3.72
Ischemic Stroke	NUP155	Nucleoporin 155	Protein Coding	45	GC05M037288	3.72
Ischemic Stroke	C4B	Complement C4B (Chido Blood Group)	Protein Coding	42	GC06P032014	3.7
Ischemic Stroke	SYP	Synaptophysin	Protein Coding	45	GC0XM049187	3.7
Ischemic Stroke	VASP	Vasodilator Stimulated Phosphoprotein	Protein Coding	44	GC19P045507	3.69
Ischemic Stroke	PIK3CG	Phosphatidylinositol-4,5-Bisphosphate 3-Kinase Catalytic Subunit Gamma	Protein Coding	49	GC07P106865	3.69
Ischemic Stroke	GRIA2	Glutamate Ionotropic Receptor AMPA Type Subunit 2	Protein Coding	50	GC04P157204	3.69
Ischemic Stroke	MIR150	MicroRNA 150	RNA Gene	22	GC19M049500	3.68
Ischemic Stroke	CRAT	Carnitine O-Acetyltransferase	Protein Coding	45	GC09M129094	3.67
Ischemic Stroke	MTAP	Methylthioadenosine Phosphorylase	Protein Coding	48	GC09P021792	3.67
Ischemic Stroke	CPQ	Carboxypeptidase Q	Protein Coding	35	GC08P096645	3.67
Ischemic Stroke	NGFR	Nerve Growth Factor Receptor	Protein Coding	47	GC17P049495	3.65
Ischemic Stroke	HAMP	Hepcidin Antimicrobial Peptide	Protein Coding	44	GC19P037707	3.64
Ischemic Stroke	LGI1	Leucine Rich Glioma Inactivated 1	Protein Coding	44	GC10P093757	3.64
Ischemic Stroke	MTDH	Metadherin	Protein Coding	41	GC08P097644	3.64
Ischemic Stroke	APOD	Apolipoprotein D	Protein Coding	44	GC03M195568	3.63
Ischemic Stroke	ESR2	Estrogen Receptor 2	Protein Coding	51	GC14M064084	3.63
Ischemic Stroke	CALB1	Calbindin 1	Protein Coding	43	GC08M090058	3.63
Ischemic Stroke	ABCB7	ATP Binding Cassette Subfamily B Member 7	Protein Coding	44	GC0XM075053	3.63
Ischemic Stroke	GSTT1	Glutathione S-Transferase Theta 1	Protein Coding	35	GC22Mi00270	3.62
Ischemic Stroke	MAPK10	Mitogen-Activated Protein Kinase 10	Protein Coding	52	GC04M085990	3.61
Ischemic Stroke	UCP3	Uncoupling Protein 3	Protein Coding	44	GC11M074000	3.61
Ischemic Stroke	IDO1	Indoleamine 2,3-Dioxygenase 1	Protein Coding	47	GC08P039891	3.61
Ischemic Stroke	IL16	Interleukin 16	Protein Coding	44	GC15P081159	3.6
Ischemic Stroke	CLEC16A	C-Type Lectin Domain Containing 16A	Protein Coding	37	GC16P010944	3.59
Ischemic Stroke	CCR3	C-C Motif Chemokine Receptor 3	Protein Coding	48	GC03P046227	3.59
Ischemic Stroke	PC	Pyruvate Carboxylase	Protein Coding	48	GC11M066848	3.59
Ischemic Stroke	ERCC1	ERCC Excision Repair 1, Endonuclease Non-Catalytic Subunit	Protein Coding	47	GC19M045409	3.59
Ischemic Stroke	XPA	XPA, DNA Damage Recognition And Repair Factor	Protein Coding	47	GC09M097635	3.59
Ischemic Stroke	KCNJ10	Potassium Inwardly Rectifying Channel Subfamily J Member 10	Protein Coding	46	GC01M159998	3.59
Ischemic Stroke	RAN	RAN, Member RAS Oncogene Family	Protein Coding	46	GC12P130871	3.59
Ischemic Stroke	RFC1	Replication Factor C Subunit 1	Protein Coding	46	GC04M039291	3.59
Ischemic Stroke	HTR1F	5-Hydroxytryptamine Receptor 1F	Protein Coding	45	GC03P087792	3.59
Ischemic Stroke	COL5A1	Collagen Type V Alpha 1 Chain	Protein Coding	45	GC09P134641	3.59
Ischemic Stroke	TRPV3	Transient Receptor Potential Cation Channel Subfamily V Member 3	Protein Coding	45	GC17M003515	3.59
Ischemic Stroke	EFEMP2	EGF Containing Fibulin Extracellular Matrix Protein 2	Protein Coding	44	GC11M065867	3.59
Ischemic Stroke	SUV39H1	Suppressor Of Variegation 3-9 Homolog 1	Protein Coding	44	GC0XP048697	3.59
Ischemic Stroke	DDX41	DEAD-Box Helicase 41	Protein Coding	44	GC05M177511	3.59
Ischemic Stroke	HIBCH	3-Hydroxyisobutyryl-CoA Hydrolase	Protein Coding	44	GC02M190189	3.59
Ischemic Stroke	ICMT	Isoprenylcysteine Carboxyl Methyltransferase	Protein Coding	43	GC01M006222	3.59
Ischemic Stroke	ZFPM2	Zinc Finger Protein, FOG Family Member 2	Protein Coding	43	GC08P104590	3.59
Ischemic Stroke	UBA7	Ubiquitin Like Modifier Activating Enzyme 7	Protein Coding	43	GC03M049805	3.59
Ischemic Stroke	RAMP3	Receptor Activity Modifying Protein 3	Protein Coding	41	GC07P045163	3.59
Ischemic Stroke	ERCC8	ERCC Excision Repair 8, CSA Ubiquitin Ligase Complex Subunit	Protein Coding	41	GC05M060873	3.59
Ischemic Stroke	KCNK10	Potassium Two Pore Domain Channel Subfamily K Member 10	Protein Coding	40	GC14M088180	3.59
Ischemic Stroke	NAT10	N-Acetyltransferase 10	Protein Coding	40	GC11P034105	3.59
Ischemic Stroke	GORAB	Golgin, RAB6 Interacting	Protein Coding	39	GC01P170501	3.59
Ischemic Stroke	CALCB	Calcitonin Related Polypeptide Beta	Protein Coding	39	GC11P014904	3.59
Ischemic Stroke	EHD4	EH Domain Containing 4	Protein Coding	38	GC15M041895	3.59
Ischemic Stroke	CLNK	Cytokine Dependent Hematopoietic Cell Linker	Protein Coding	37	GC04M010491	3.59
Ischemic Stroke	GABRR3	Gamma-Aminobutyric Acid Type A Receptor Subunit Rho3 (Gene/Pseudogene)	Protein Coding	37	GC03M097986	3.59
Ischemic Stroke	BLOC1S1	Biogenesis Of Lysosomal Organelles Complex 1 Subunit 1	Protein Coding	37	GC12P055718	3.59
Ischemic Stroke	FHL5	Four And A Half LIM Domains 5	Protein Coding	37	GC06P096562	3.59
Ischemic Stroke	NSD2	Nuclear Receptor Binding SET Domain Protein 2	Protein Coding	36	GC04P001872	3.59
Ischemic Stroke	IMPACT	Impact RWD Domain Protein	Protein Coding	36	GC18P024426	3.59
Ischemic Stroke	AMELX	Amelogenin X-Linked	Protein Coding	36	GC0XP011293	3.59
Ischemic Stroke	AVIL	Advillin	Protein Coding	36	GC12M057793	3.59
Ischemic Stroke	SYNE3	Spectrin Repeat Containing Nuclear Envelope Family Member 3	Protein Coding	36	GC14M095408	3.59
Ischemic Stroke	SYNE4	Spectrin Repeat Containing Nuclear Envelope Family Member 4	Protein Coding	33	GC19M036003	3.59
Ischemic Stroke	CDR1	Cerebellar Degeneration Related Protein 1	Protein Coding	32	GC0XM140782	3.59
Ischemic Stroke	LEXM	Lymphocyte Expansion Molecule	Protein Coding	25	GC01P054807	3.59
Ischemic Stroke	MRGPRG-AS1	MRGPRG Antisense RNA 1	RNA Gene	20	GC11P003218	3.59
Ischemic Stroke	H3-2	H3.2 Histone (Putative)	Protein Coding	17	GC01M143894	3.59
Ischemic Stroke	BCHE	Butyrylcholinesterase	Protein Coding	50	GC03M165772	3.58
Ischemic Stroke	PATJ	PATJ Crumbs Cell Polarity Complex Component	Protein Coding	32	GC01P061743	3.57
Ischemic Stroke	PRKAA2	Protein Kinase AMP-Activated Catalytic Subunit Alpha 2	Protein Coding	51	GC01P056645	3.57
Ischemic Stroke	FNDC5	Fibronectin Type III Domain Containing 5	Protein Coding	35	GC01M032864	3.54
Ischemic Stroke	FOLH1	Folate Hydrolase 1	Protein Coding	48	GC11M059742	3.54
Ischemic Stroke	TRPM7	Transient Receptor Potential Cation Channel Subfamily M Member 7	Protein Coding	47	GC15M050552	3.54
Ischemic Stroke	CTSG	Cathepsin G	Protein Coding	46	GC14M024573	3.54
Ischemic Stroke	OPA1	OPA1 Mitochondrial Dynamin Like GTPase	Protein Coding	44	GC03P193594	3.54
Ischemic Stroke	MIR30A	MicroRNA 30a	RNA Gene	20	GC06M071403	3.53
Ischemic Stroke	IRAK1	Interleukin 1 Receptor Associated Kinase 1	Protein Coding	51	GC0XM154010	3.52
Ischemic Stroke	IRF5	Interferon Regulatory Factor 5	Protein Coding	50	GC07P128937	3.52
Ischemic Stroke	APEX1	Apurinic/Apyrimidinic Endodeoxyribonuclease 1	Protein Coding	47	GC14P020455	3.52
Ischemic Stroke	TSC1	TSC Complex Subunit 1	Protein Coding	50	GC09M132891	3.51
Ischemic Stroke	EPRS1	Glutamyl-Prolyl-TRNA Synthetase 1	Protein Coding	37	GC01M219969	3.51
Ischemic Stroke	CDH13	Cadherin 13	Protein Coding	43	GC16P082626	3.5
Ischemic Stroke	CD2AP	CD2 Associated Protein	Protein Coding	44	GC06P047445	3.5
Ischemic Stroke	SUOX	Sulfite Oxidase	Protein Coding	46	GC12P055997	3.49
Ischemic Stroke	CXCL16	C-X-C Motif Chemokine Ligand 16	Protein Coding	41	GC17M004733	3.49
Ischemic Stroke	GOLGB1	Golgin B1	Protein Coding	38	GC03M121663	3.48
Ischemic Stroke	MTTP	Microsomal Triglyceride Transfer Protein	Protein Coding	46	GC04P099563	3.47
Ischemic Stroke	DPH1	Diphthamide Biosynthesis 1	Protein Coding	41	GC17P002030	3.45
Ischemic Stroke	LTA4H	Leukotriene A4 Hydrolase	Protein Coding	47	GC12M096000	3.45
Ischemic Stroke	LOC110673971	CYP11B2 Promoter	Biological Region	2	GC08U902746	3.45
Ischemic Stroke	CXCR2	C-X-C Motif Chemokine Receptor 2	Protein Coding	50	GC02P218125	3.42
Ischemic Stroke	FGF4	Fibroblast Growth Factor 4	Protein Coding	45	GC11M069762	3.42
Ischemic Stroke	SMARCA2	SWI/SNF Related, Matrix Associated, Actin Dependent Regulator Of Chromatin, Subfamily A, Member 2	Protein Coding	51	GC09P001980	3.42
Ischemic Stroke	PAX2	Paired Box 2	Protein Coding	48	GC10P100735	3.42
Ischemic Stroke	SERPINB1	Serpin Family B Member 1	Protein Coding	41	GC06M002833	3.42
Ischemic Stroke	COIL	Coilin	Protein Coding	41	GC17M056938	3.42
Ischemic Stroke	SMARCA1	SWI/SNF Related, Matrix Associated, Actin Dependent Regulator Of Chromatin, Subfamily A, Member 1	Protein Coding	39	GC0XM129447	3.42
Ischemic Stroke	LOC102723566	Uncharacterized LOC102723566	RNA Gene	8	GC09P127816	3.42
Ischemic Stroke	MTRR	5-Methyltetrahydrofolate-Homocysteine Methyltransferase Reductase	Protein Coding	44	GC05P007851	3.41
Ischemic Stroke	GPX1	Glutathione Peroxidase 1	Protein Coding	49	GC03M049370	3.41
Ischemic Stroke	AR	Androgen Receptor	Protein Coding	54	GC0XP067544	3.41
Ischemic Stroke	ARHGEF10	Rho Guanine Nucleotide Exchange Factor 10	Protein Coding	43	GC08P001823	3.4
Ischemic Stroke	NR4A2	Nuclear Receptor Subfamily 4 Group A Member 2	Protein Coding	47	GC02M156324	3.39
Ischemic Stroke	CD28	CD28 Molecule	Protein Coding	48	GC02P203706	3.38
Ischemic Stroke	ADAMTS2	ADAM Metallopeptidase With Thrombospondin Type 1 Motif 2	Protein Coding	44	GC05M179110	3.37
Ischemic Stroke	CYSLTR1	Cysteinyl Leukotriene Receptor 1	Protein Coding	44	GC0XM078271	3.36
Ischemic Stroke	CYP2E1	Cytochrome P450 Family 2 Subfamily E Member 1	Protein Coding	47	GC10P133520	3.36
Ischemic Stroke	KCNH2	Potassium Voltage-Gated Channel Subfamily H Member 2	Protein Coding	51	GC07M150944	3.35
Ischemic Stroke	ALKBH8	AlkB Homolog 8, TRNA Methyltransferase	Protein Coding	38	GC11M107502	3.35
Ischemic Stroke	STK11	Serine/Threonine Kinase 11	Protein Coding	50	GC19P001177	3.34
Ischemic Stroke	KLK15	Kallikrein Related Peptidase 15	Protein Coding	42	GC19M050825	3.34
Ischemic Stroke	GSTO1	Glutathione S-Transferase Omega 1	Protein Coding	44	GC10P104235	3.34
Ischemic Stroke	CIITA	Class II Major Histocompatibility Complex Transactivator	Protein Coding	46	GC16P010879	3.33
Ischemic Stroke	PDGFA	Platelet Derived Growth Factor Subunit A	Protein Coding	45	GC07M000497	3.33
Ischemic Stroke	BAK1	BCL2 Antagonist/Killer 1	Protein Coding	46	GC06M033572	3.33
Ischemic Stroke	EPHA3	EPH Receptor A3	Protein Coding	46	GC03P089077	3.33
Ischemic Stroke	DLG4	Discs Large MAGUK Scaffold Protein 4	Protein Coding	47	GC17M007189	3.31
Ischemic Stroke	ABCG1	ATP Binding Cassette Subfamily G Member 1	Protein Coding	45	GC21P042199	3.31
Ischemic Stroke	USF1	Upstream Transcription Factor 1	Protein Coding	44	GC01M161039	3.31
Ischemic Stroke	GAST	Gastrin	Protein Coding	41	GC17P041712	3.31
Ischemic Stroke	LAMB2	Laminin Subunit Beta 2	Protein Coding	45	GC03M049121	3.28
Ischemic Stroke	FCGR1A	Fc Fragment Of IgG Receptor Ia	Protein Coding	43	GC01P149754	3.28
Ischemic Stroke	ALOX15	Arachidonate 15-Lipoxygenase	Protein Coding	45	GC17M004630	3.28
Ischemic Stroke	BTD	Biotinidase	Protein Coding	45	GC03P015621	3.28
Ischemic Stroke	STMN2	Stathmin 2	Protein Coding	40	GC08P079610	3.28
Ischemic Stroke	CTXN1	Cortexin 1	Protein Coding	33	GC19M007924	3.26
Ischemic Stroke	IRF1	Interferon Regulatory Factor 1	Protein Coding	49	GC05M132481	3.26
Ischemic Stroke	DCN	Decorin	Protein Coding	48	GC12M091140	3.25
Ischemic Stroke	IMPA2	Inositol Monophosphatase 2	Protein Coding	46	GC18P011981	3.25
Ischemic Stroke	KIAA0319L	KIAA0319 Like	Protein Coding	39	GC01M035433	3.25
Ischemic Stroke	TRAF3	TNF Receptor Associated Factor 3	Protein Coding	48	GC14P104312	3.24
Ischemic Stroke	LTF	Lactotransferrin	Protein Coding	45	GC03M046435	3.24
Ischemic Stroke	GGCX	Gamma-Glutamyl Carboxylase	Protein Coding	47	GC02M085544	3.24
Ischemic Stroke	SAA1	Serum Amyloid A1	Protein Coding	43	GC11P018267	3.24
Ischemic Stroke	CALM1	Calmodulin 1	Protein Coding	45	GC14P090396	3.23
Ischemic Stroke	ANGPTL3	Angiopoietin Like 3	Protein Coding	45	GC01P062597	3.23
Ischemic Stroke	TAP1	Transporter 1, ATP Binding Cassette Subfamily B Member	Protein Coding	48	GC06M032866	3.22
Ischemic Stroke	ECHS1	Enoyl-CoA Hydratase, Short Chain 1	Protein Coding	48	GC10M133362	3.22
Ischemic Stroke	ACADSB	Acyl-CoA Dehydrogenase Short/Branched Chain	Protein Coding	47	GC10P123008	3.22
Ischemic Stroke	AP2B1	Adaptor Related Protein Complex 2 Subunit Beta 1	Protein Coding	44	GC17P035578	3.22
Ischemic Stroke	IDUA	Alpha-L-Iduronidase	Protein Coding	43	GC04P000986	3.22
Ischemic Stroke	SLC2A6	Solute Carrier Family 2 Member 6	Protein Coding	43	GC09M133471	3.22
Ischemic Stroke	CISD2	CDGSH Iron Sulfur Domain 2	Protein Coding	43	GC04P102868	3.22
Ischemic Stroke	MRE11	MRE11 Homolog, Double Strand Break Repair Nuclease	Protein Coding	43	GC11M094416	3.22
Ischemic Stroke	PRG2	Proteoglycan 2, Pro Eosinophil Major Basic Protein	Protein Coding	41	GC11M057386	3.22
Ischemic Stroke	DR1	Down-Regulator Of Transcription 1	Protein Coding	40	GC01P093345	3.22
Ischemic Stroke	SLC2A11	Solute Carrier Family 2 Member 11	Protein Coding	39	GC22P023856	3.22
Ischemic Stroke	CDR2	Cerebellar Degeneration Related Protein 2	Protein Coding	39	GC16M022357	3.22
Ischemic Stroke	ALLC	Allantoicase	Protein Coding	36	GC02P003658	3.22
Ischemic Stroke	DUSP11	Dual Specificity Phosphatase 11	Protein Coding	35	GC02M073762	3.22
Ischemic Stroke	C4A	Complement C4A (Rodgers Blood Group)	Protein Coding	44	GC06P033433	3.22
Ischemic Stroke	MIR142	MicroRNA 142	RNA Gene	20	GC17M058331	3.21
Ischemic Stroke	TIMD4	T Cell Immunoglobulin And Mucin Domain Containing 4	Protein Coding	37	GC05M156919	3.21
Ischemic Stroke	TRH	Thyrotropin Releasing Hormone	Protein Coding	43	GC03P129974	3.2
Ischemic Stroke	PSMA6	Proteasome 20S Subunit Alpha 6	Protein Coding	47	GC14P035278	3.19
Ischemic Stroke	APOC1	Apolipoprotein C1	Protein Coding	41	GC19P044914	3.18
Ischemic Stroke	PLA2G6	Phospholipase A2 Group VI	Protein Coding	50	GC22M045345	3.18
Ischemic Stroke	TTF2	Transcription Termination Factor 2	Protein Coding	40	GC01P117060	3.18
Ischemic Stroke	KIF6	Kinesin Family Member 6	Protein Coding	38	GC06M041324	3.18
Ischemic Stroke	TNFSF12	TNF Superfamily Member 12	Protein Coding	42	GC17P007935	3.17
Ischemic Stroke	HSP90AA1	Heat Shock Protein 90 Alpha Family Class A Member 1	Protein Coding	50	GC14M102080	3.16
Ischemic Stroke	ANK2	Ankyrin 2	Protein Coding	43	GC04P112818	3.16
Ischemic Stroke	TTC7B	Tetratricopeptide Repeat Domain 7B	Protein Coding	35	GC14M090524	3.15
Ischemic Stroke	S1PR1	Sphingosine-1-Phosphate Receptor 1	Protein Coding	46	GC01P101236	3.14
Ischemic Stroke	PLCG1	Phospholipase C Gamma 1	Protein Coding	48	GC20P041136	3.12
Ischemic Stroke	CAPN10	Calpain 10	Protein Coding	42	GC02P240586	3.12
Ischemic Stroke	MIRLET7I	MicroRNA Let-7i	RNA Gene	20	GC12P062606	3.12
Ischemic Stroke	PTGDS	Prostaglandin D2 Synthase	Protein Coding	46	GC09P136977	3.12
Ischemic Stroke	SRSF3	Serine And Arginine Rich Splicing Factor 3	Protein Coding	41	GC06P046053	3.11
Ischemic Stroke	CCL26	C-C Motif Chemokine Ligand 26	Protein Coding	39	GC07M075769	3.11
Ischemic Stroke	HSPB2	Heat Shock Protein Family B (Small) Member 2	Protein Coding	42	GC11P111913	3.1
Ischemic Stroke	PNP	Purine Nucleoside Phosphorylase	Protein Coding	49	GC14P020468	3.1
Ischemic Stroke	HSPG2	Heparan Sulfate Proteoglycan 2	Protein Coding	48	GC01M021822	3.1
Ischemic Stroke	VTN	Vitronectin	Protein Coding	45	GC17M029696	3.09
Ischemic Stroke	MIR130B	MicroRNA 130b	RNA Gene	18	GC22P023989	3.09
Ischemic Stroke	DSP	Desmoplakin	Protein Coding	51	GC06P007541	3.08
Ischemic Stroke	GAL	Galanin And GMAP Prepropeptide	Protein Coding	45	GC11P068701	3.07
Ischemic Stroke	STAT1	Signal Transducer And Activator Of Transcription 1	Protein Coding	55	GC02M190964	3.07
Ischemic Stroke	MIR144	MicroRNA 144	RNA Gene	17	GC17M029703	3.04
Ischemic Stroke	ABCC1	ATP Binding Cassette Subfamily C Member 1	Protein Coding	48	GC16P015949	3.04
Ischemic Stroke	EGR1	Early Growth Response 1	Protein Coding	45	GC05P138465	3.03
Ischemic Stroke	TNFRSF11A	TNF Receptor Superfamily Member 11a	Protein Coding	47	GC18P062325	3.03
Ischemic Stroke	FADS1	Fatty Acid Desaturase 1	Protein Coding	44	GC11M061799	3.02
Ischemic Stroke	IL33	Interleukin 33	Protein Coding	41	GC09P006206	3
Ischemic Stroke	SCARB1	Scavenger Receptor Class B Member 1	Protein Coding	47	GC12M124776	3
Ischemic Stroke	SETX	Senataxin	Protein Coding	41	GC09M132261	2.99
Ischemic Stroke	MIR30B	MicroRNA 30b	RNA Gene	21	GC08M134800	2.98
Ischemic Stroke	ADH1C	Alcohol Dehydrogenase 1C (Class I), Gamma Polypeptide	Protein Coding	43	GC04M099336	2.97
Ischemic Stroke	TRIM72	Tripartite Motif Containing 72	Protein Coding	37	GC16P031419	2.97
Ischemic Stroke	SLC2A3	Solute Carrier Family 2 Member 3	Protein Coding	50	GC12M007919	2.96
Ischemic Stroke	NQO1	NAD(P)H Quinone Dehydrogenase 1	Protein Coding	51	GC16M069706	2.95
Ischemic Stroke	GAD2	Glutamate Decarboxylase 2	Protein Coding	47	GC10P026216	2.94
Ischemic Stroke	CXCR3	C-X-C Motif Chemokine Receptor 3	Protein Coding	45	GC0XM071615	2.94
Ischemic Stroke	GSTP1	Glutathione S-Transferase Pi 1	Protein Coding	51	GC11P067583	2.94
Ischemic Stroke	NCAM1	Neural Cell Adhesion Molecule 1	Protein Coding	47	GC11P112961	2.93
Ischemic Stroke	ALPL	Alkaline Phosphatase, Biomineralization Associated	Protein Coding	52	GC01P021508	2.93
Ischemic Stroke	IL18R1	Interleukin 18 Receptor 1	Protein Coding	44	GC02P102311	2.92
Ischemic Stroke	TRIB1	Tribbles Pseudokinase 1	Protein Coding	39	GC08P125430	2.92
Ischemic Stroke	CKM	Creatine Kinase, M-Type	Protein Coding	46	GC19M045306	2.92
Ischemic Stroke	MS4A2	Membrane Spanning 4-Domains A2	Protein Coding	43	GC11P060088	2.91
Ischemic Stroke	CTSK	Cathepsin K	Protein Coding	50	GC01M150796	2.91
Ischemic Stroke	ADCY10	Adenylate Cyclase 10	Protein Coding	45	GC01M167809	2.91
Ischemic Stroke	EPAS1	Endothelial PAS Domain Protein 1	Protein Coding	50	GC02P046293	2.9
Ischemic Stroke	PROS1	Protein S	Protein Coding	48	GC03M093873	2.9
Ischemic Stroke	TCF21	Transcription Factor 21	Protein Coding	37	GC06P133889	2.9
Ischemic Stroke	CXCL1	C-X-C Motif Chemokine Ligand 1	Protein Coding	44	GC04P073869	2.9
Ischemic Stroke	FGF21	Fibroblast Growth Factor 21	Protein Coding	41	GC19P048764	2.9
Ischemic Stroke	ACP1	Acid Phosphatase 1	Protein Coding	45	GC02P000254	2.89
Ischemic Stroke	SAA4	Serum Amyloid A4, Constitutive	Protein Coding	40	GC11M018234	2.88
Ischemic Stroke	TREM2	Triggering Receptor Expressed On Myeloid Cells 2	Protein Coding	44	GC06M041359	2.88
Ischemic Stroke	HAVCR2	Hepatitis A Virus Cellular Receptor 2	Protein Coding	45	GC05M157063	2.86
Ischemic Stroke	SERPINA12	Serpin Family A Member 12	Protein Coding	40	GC14M094487	2.86
Ischemic Stroke	SELENOS	Selenoprotein S	Protein Coding	32	GC15M102816	2.86
Ischemic Stroke	DCTN1	Dynactin Subunit 1	Protein Coding	47	GC02M074361	2.85
Ischemic Stroke	S100A1	S100 Calcium Binding Protein A1	Protein Coding	43	GC01P153627	2.85
Ischemic Stroke	TGM2	Transglutaminase 2	Protein Coding	50	GC20M038127	2.85
Ischemic Stroke	TRPM3	Transient Receptor Potential Cation Channel Subfamily M Member 3	Protein Coding	42	GC09M070529	2.85
Ischemic Stroke	UGT1A1	UDP Glucuronosyltransferase Family 1 Member A1	Protein Coding	50	GC02P233760	2.84
Ischemic Stroke	NDE1	NudE Neurodevelopment Protein 1	Protein Coding	43	GC16P015663	2.84
Ischemic Stroke	P2RX7	Purinergic Receptor P2X 7	Protein Coding	47	GC12P122630	2.83
Ischemic Stroke	CD58	CD58 Molecule	Protein Coding	41	GC01M116514	2.83
Ischemic Stroke	GFRA1	GDNF Family Receptor Alpha 1	Protein Coding	45	GC10M116056	2.83
Ischemic Stroke	GCK	Glucokinase	Protein Coding	52	GC07M044145	2.83
Ischemic Stroke	MIR206	MicroRNA 206	RNA Gene	21	GC06P052144	2.83
Ischemic Stroke	CDKN3	Cyclin Dependent Kinase Inhibitor 3	Protein Coding	41	GC14P054398	2.82
Ischemic Stroke	ATL1	Atlastin GTPase 1	Protein Coding	42	GC14P050532	2.82
Ischemic Stroke	FOXO1	Forkhead Box O1	Protein Coding	50	GC13M040555	2.81
Ischemic Stroke	GCLC	Glutamate-Cysteine Ligase Catalytic Subunit	Protein Coding	45	GC06M053497	2.81
Ischemic Stroke	KRT14	Keratin 14	Protein Coding	49	GC17M041582	2.81
Ischemic Stroke	TAAR1	Trace Amine Associated Receptor 1	Protein Coding	37	GC06M132644	2.81
Ischemic Stroke	ASPM	Abnormal Spindle Microtubule Assembly	Protein Coding	40	GC01M197084	2.81
Ischemic Stroke	CFHR4	Complement Factor H Related 4	Protein Coding	36	GC01P196857	2.81
Ischemic Stroke	MMAB	Metabolism Of Cobalamin Associated B	Protein Coding	45	GC12M109553	2.81
Ischemic Stroke	MCEE	Methylmalonyl-CoA Epimerase	Protein Coding	43	GC02M071110	2.81
Ischemic Stroke	RECK	Reversion Inducing Cysteine Rich Protein With Kazal Motifs	Protein Coding	42	GC09P036036	2.81
Ischemic Stroke	MMADHC	Metabolism Of Cobalamin Associated D	Protein Coding	41	GC02M149569	2.81
Ischemic Stroke	MMAA	Metabolism Of Cobalamin Associated A	Protein Coding	40	GC04P145604	2.81
Ischemic Stroke	RNF144B	Ring Finger Protein 144B	Protein Coding	37	GC06P018277	2.81
Ischemic Stroke	C12orf65	Chromosome 12 Open Reading Frame 65	Protein Coding	37	GC12P123232	2.81
Ischemic Stroke	CD59	CD59 Molecule (CD59 Blood Group)	Protein Coding	48	GC11M033704	2.8
Ischemic Stroke	CNNM2	Cyclin And CBS Domain Divalent Metal Cation Transport Mediator 2	Protein Coding	43	GC10P102918	2.78
Ischemic Stroke	IL1RL1	Interleukin 1 Receptor Like 1	Protein Coding	43	GC02P102294	2.78
Ischemic Stroke	KIF5A	Kinesin Family Member 5A	Protein Coding	45	GC12P057549	2.78
Ischemic Stroke	ENO1	Enolase 1	Protein Coding	48	GC01M008861	2.77
Ischemic Stroke	SLC22A3	Solute Carrier Family 22 Member 3	Protein Coding	44	GC06P160348	2.77
Ischemic Stroke	IL21	Interleukin 21	Protein Coding	44	GC04M122612	2.77
Ischemic Stroke	CCR1	C-C Motif Chemokine Receptor 1	Protein Coding	47	GC03M046218	2.77
Ischemic Stroke	MLH1	MutL Homolog 1	Protein Coding	49	GC03P036993	2.75
Ischemic Stroke	TMLHE	Trimethyllysine Hydroxylase, Epsilon	Protein Coding	44	GC0XM155489	2.75
Ischemic Stroke	GBE1	1,4-Alpha-Glucan Branching Enzyme 1	Protein Coding	44	GC03M081489	2.75
Ischemic Stroke	GCSH	Glycine Cleavage System Protein H	Protein Coding	44	GC16M081081	2.75
Ischemic Stroke	BCKDHB	Branched Chain Keto Acid Dehydrogenase E1 Subunit Beta	Protein Coding	44	GC06P080106	2.75
Ischemic Stroke	LINGO1	Leucine Rich Repeat And Ig Domain Containing 1	Protein Coding	44	GC15M077613	2.75
Ischemic Stroke	DSTYK	Dual Serine/Threonine And Tyrosine Protein Kinase	Protein Coding	43	GC01M205111	2.75
Ischemic Stroke	ANO1	Anoctamin 1	Protein Coding	43	GC11P070078	2.75
Ischemic Stroke	NRG2	Neuregulin 2	Protein Coding	42	GC05M139810	2.75
Ischemic Stroke	PARL	Presenilin Associated Rhomboid Like	Protein Coding	42	GC03M183825	2.75
Ischemic Stroke	GCM2	Glial Cells Missing Transcription Factor 2	Protein Coding	42	GC06M010873	2.75
Ischemic Stroke	ZMYND11	Zinc Finger MYND-Type Containing 11	Protein Coding	42	GC10P000134	2.75
Ischemic Stroke	COX8A	Cytochrome C Oxidase Subunit 8A	Protein Coding	41	GC11P063977	2.75
Ischemic Stroke	WDR45	WD Repeat Domain 45	Protein Coding	41	GC0XM049074	2.75
Ischemic Stroke	DGCR2	DiGeorge Syndrome Critical Region Gene 2	Protein Coding	40	GC22M019037	2.75
Ischemic Stroke	OPA3	Outer Mitochondrial Membrane Lipid Metabolism Regulator OPA3	Protein Coding	40	GC19M045527	2.75
Ischemic Stroke	LMBRD1	LMBR1 Domain Containing 1	Protein Coding	40	GC06M069675	2.75
Ischemic Stroke	IBSP	Integrin Binding Sialoprotein	Protein Coding	39	GC04P087799	2.75
Ischemic Stroke	DENR	Density Regulated Re-Initiation And Release Factor	Protein Coding	39	GC12P122752	2.75
Ischemic Stroke	MFF	Mitochondrial Fission Factor	Protein Coding	39	GC02P227325	2.75
Ischemic Stroke	MYBPH	Myosin Binding Protein H	Protein Coding	38	GC01M203136	2.75
Ischemic Stroke	CD52	CD52 Molecule	Protein Coding	37	GC01P026317	2.75
Ischemic Stroke	ZNF2	Zinc Finger Protein 2	Protein Coding	36	GC02P095165	2.75
Ischemic Stroke	ZNF274	Zinc Finger Protein 274	Protein Coding	36	GC19P058182	2.75
Ischemic Stroke	MIEF1	Mitochondrial Elongation Factor 1	Protein Coding	33	GC22P039501	2.75
Ischemic Stroke	MIEF2	Mitochondrial Elongation Factor 2	Protein Coding	33	GC17P018262	2.75
Ischemic Stroke	CDR2L	Cerebellar Degeneration Related Protein 2 Like	Protein Coding	32	GC17P074987	2.75
Ischemic Stroke	STH	Saitohin	Protein Coding	31	GC17P045999	2.75
Ischemic Stroke	IGF2-AS	IGF2 Antisense RNA	RNA Gene	25	GC11P002140	2.75
Ischemic Stroke	HAR1B	Highly Accelerated Region 1B	RNA Gene	18	GC20M063095	2.75
Ischemic Stroke	MIR185	MicroRNA 185	RNA Gene	22	GC22P020034	2.75
Ischemic Stroke	FLG	Filaggrin	Protein Coding	41	GC01M152274	2.74
Ischemic Stroke	PTPRF	Protein Tyrosine Phosphatase Receptor Type F	Protein Coding	51	GC01P043527	2.74
Ischemic Stroke	FCN1	Ficolin 1	Protein Coding	41	GC09M134970	2.74
Ischemic Stroke	SOAT1	Sterol O-Acyltransferase 1	Protein Coding	45	GC01P179262	2.74
Ischemic Stroke	VEGFB	Vascular Endothelial Growth Factor B	Protein Coding	45	GC11P064234	2.74
Ischemic Stroke	CDH4	Cadherin 4	Protein Coding	43	GC20P061252	2.73
Ischemic Stroke	CRYBG1	Crystallin Beta-Gamma Domain Containing 1	Protein Coding	28	GC06P106361	2.73
Ischemic Stroke	PSRC1	Proline And Serine Rich Coiled-Coil 1	Protein Coding	39	GC01M109279	2.73
Ischemic Stroke	ITGAV	Integrin Subunit Alpha V	Protein Coding	48	GC02P186589	2.72
Ischemic Stroke	CTSD	Cathepsin D	Protein Coding	54	GC11M001752	2.72
Ischemic Stroke	TCF7	Transcription Factor 7	Protein Coding	45	GC05P134114	2.72
Ischemic Stroke	IFIH1	Interferon Induced With Helicase C Domain 1	Protein Coding	49	GC02M162267	2.72
Ischemic Stroke	ABCG8	ATP Binding Cassette Subfamily G Member 8	Protein Coding	43	GC02P043828	2.72
Ischemic Stroke	ATP13A2	ATPase Cation Transporting 13A2	Protein Coding	43	GC01M016985	2.71
Ischemic Stroke	SLPI	Secretory Leukocyte Peptidase Inhibitor	Protein Coding	41	GC20M045252	2.71
Ischemic Stroke	NDUFS4	NADH:Ubiquinone Oxidoreductase Subunit S4	Protein Coding	43	GC05P053560	2.71
Ischemic Stroke	PTGES	Prostaglandin E Synthase	Protein Coding	42	GC09M129738	2.7
Ischemic Stroke	SUPT3H	SPT3 Homolog, SAGA And STAGA Complex Component	Protein Coding	40	GC06M044807	2.7
Ischemic Stroke	ABCD2	ATP Binding Cassette Subfamily D Member 2	Protein Coding	41	GC12M039550	2.69
Ischemic Stroke	SLC17A3	Solute Carrier Family 17 Member 3	Protein Coding	41	GC06M025833	2.69
Ischemic Stroke	GHR	Growth Hormone Receptor	Protein Coding	48	GC05P042429	2.69
Ischemic Stroke	SIGMAR1	Sigma Non-Opioid Intracellular Receptor 1	Protein Coding	47	GC09M034634	2.69
Ischemic Stroke	NT5C2	5'-Nucleotidase, Cytosolic II	Protein Coding	47	GC10M103088	2.69
Ischemic Stroke	SLC9A3R2	SLC9A3 Regulator 2	Protein Coding	41	GC16P002383	2.69
Ischemic Stroke	GAS6	Growth Arrest Specific 6	Protein Coding	45	GC13M113820	2.69
Ischemic Stroke	MIR130A	MicroRNA 130a	RNA Gene	20	GC11P057641	2.68
Ischemic Stroke	TUBB3	Tubulin Beta 3 Class III	Protein Coding	51	GC16P089919	2.68
Ischemic Stroke	PROM1	Prominin 1	Protein Coding	46	GC04M015965	2.68
Ischemic Stroke	ADK	Adenosine Kinase	Protein Coding	53	GC10P074152	2.68
Ischemic Stroke	ADAMTS1	ADAM Metallopeptidase With Thrombospondin Type 1 Motif 1	Protein Coding	45	GC21M026835	2.67
Ischemic Stroke	CNR2	Cannabinoid Receptor 2	Protein Coding	47	GC01M023870	2.67
Ischemic Stroke	EIF2AK2	Eukaryotic Translation Initiation Factor 2 Alpha Kinase 2	Protein Coding	47	GC02M037099	2.67
Ischemic Stroke	ZPR1	ZPR1 Zinc Finger	Protein Coding	36	GC11M116777	2.66
Ischemic Stroke	PEAR1	Platelet Endothelial Aggregation Receptor 1	Protein Coding	36	GC01P156893	2.66
Ischemic Stroke	MIR451A	MicroRNA 451a	RNA Gene	17	GC17M028861	2.64
Ischemic Stroke	GZMB	Granzyme B	Protein Coding	47	GC14M024630	2.64
Ischemic Stroke	SERPINA9	Serpin Family A Member 9	Protein Coding	36	GC14M094462	2.64
Ischemic Stroke	HNF4A	Hepatocyte Nuclear Factor 4 Alpha	Protein Coding	52	GC20P044355	2.63
Ischemic Stroke	NLRP1	NLR Family Pyrin Domain Containing 1	Protein Coding	45	GC17M005499	2.63
Ischemic Stroke	C3AR1	Complement C3a Receptor 1	Protein Coding	44	GC12M008058	2.63
Ischemic Stroke	SPSB4	SplA/Ryanodine Receptor Domain And SOCS Box Containing 4	Protein Coding	33	GC03P141051	2.63
Ischemic Stroke	PLIN1	Perilipin 1	Protein Coding	46	GC15M089664	2.62
Ischemic Stroke	TANGO2	Transport And Golgi Organization 2 Homolog	Protein Coding	35	GC22P020017	2.62
Ischemic Stroke	CCL7	C-C Motif Chemokine Ligand 7	Protein Coding	43	GC17P034270	2.62
Ischemic Stroke	TSC2	TSC Complex Subunit 2	Protein Coding	51	GC16P002385	2.61
Ischemic Stroke	CAPN1	Calpain 1	Protein Coding	51	GC11P065198	2.61
Ischemic Stroke	HLA-DQA1	Major Histocompatibility Complex, Class II, DQ Alpha 1	Protein Coding	44	GC06P033442	2.6
Ischemic Stroke	PDGFD	Platelet Derived Growth Factor D	Protein Coding	45	GC11M103907	2.6
Ischemic Stroke	BDKRB1	Bradykinin Receptor B1	Protein Coding	44	GC14P096260	2.6
Ischemic Stroke	AKT2	AKT Serine/Threonine Kinase 2	Protein Coding	56	GC19M040230	2.59
Ischemic Stroke	CDC5L	Cell Division Cycle 5 Like	Protein Coding	40	GC06P044387	2.59
Ischemic Stroke	FGFR2	Fibroblast Growth Factor Receptor 2	Protein Coding	55	GC10M121478	2.59
Ischemic Stroke	GAP43	Growth Associated Protein 43	Protein Coding	43	GC03P115623	2.59
Ischemic Stroke	CYP1B1	Cytochrome P450 Family 1 Subfamily B Member 1	Protein Coding	50	GC02M038034	2.58
Ischemic Stroke	PRKAA1	Protein Kinase AMP-Activated Catalytic Subunit Alpha 1	Protein Coding	49	GC05M040759	2.58
Ischemic Stroke	RUVBL2	RuvB Like AAA ATPase 2	Protein Coding	45	GC19P048993	2.57
Ischemic Stroke	LLGL2	LLGL Scribble Cell Polarity Complex Component 2	Protein Coding	40	GC17P075525	2.57
Ischemic Stroke	RUNX1	RUNX Family Transcription Factor 1	Protein Coding	50	GC21M034787	2.57
Ischemic Stroke	HSPA1B	Heat Shock Protein Family A (Hsp70) Member 1B	Protein Coding	41	GC06P033427	2.56
Ischemic Stroke	HDAC4	Histone Deacetylase 4	Protein Coding	52	GC02M239048	2.56
Ischemic Stroke	ZC3H12A	Zinc Finger CCCH-Type Containing 12A	Protein Coding	37	GC01P037474	2.56
Ischemic Stroke	HPSE	Heparanase	Protein Coding	46	GC04M083292	2.55
Ischemic Stroke	PRKCB	Protein Kinase C Beta	Protein Coding	49	GC16P023872	2.55
Ischemic Stroke	NAA25	N-Alpha-Acetyltransferase 25, NatB Auxiliary Subunit	Protein Coding	36	GC12M112026	2.55
Ischemic Stroke	SPTBN5	Spectrin Beta, Non-Erythrocytic 5	Protein Coding	36	GC15M041848	2.54
Ischemic Stroke	MIR125B1	MicroRNA 125b-1	RNA Gene	22	GC11M122100	2.54
Ischemic Stroke	MIR125B2	MicroRNA 125b-2	RNA Gene	22	GC21P016590	2.54
Ischemic Stroke	MIR503	MicroRNA 503	RNA Gene	17	GC0XM134624	2.54
Ischemic Stroke	LGALS1	Galectin 1	Protein Coding	45	GC22P037675	2.54
Ischemic Stroke	GSK3B	Glycogen Synthase Kinase 3 Beta	Protein Coding	51	GC03M119821	2.54
Ischemic Stroke	PLAUR	Plasminogen Activator, Urokinase Receptor	Protein Coding	46	GC19M043646	2.54
Ischemic Stroke	P4HB	Prolyl 4-Hydroxylase Subunit Beta	Protein Coding	51	GC17M081843	2.53
Ischemic Stroke	ITGB6	Integrin Subunit Beta 6	Protein Coding	47	GC02M160099	2.53
Ischemic Stroke	GLUL	Glutamate-Ammonia Ligase	Protein Coding	51	GC01M182350	2.53
Ischemic Stroke	MIR27B	MicroRNA 27b	RNA Gene	21	GC09P095098	2.53
Ischemic Stroke	CYSLTR2	Cysteinyl Leukotriene Receptor 2	Protein Coding	48	GC13P048653	2.52
Ischemic Stroke	NLGN1	Neuroligin 1	Protein Coding	44	GC03P173396	2.52
Ischemic Stroke	MIR382	MicroRNA 382	RNA Gene	16	GC14P104459	2.52
Ischemic Stroke	LIPA	Lipase A, Lysosomal Acid Type	Protein Coding	48	GC10M089213	2.51
Ischemic Stroke	PKP2	Plakophilin 2	Protein Coding	46	GC12M032790	2.51
Ischemic Stroke	SMN1	Survival Of Motor Neuron 1, Telomeric	Protein Coding	42	GC05P070924	2.51
Ischemic Stroke	RAPGEF3	Rap Guanine Nucleotide Exchange Factor 3	Protein Coding	46	GC12M047736	2.51
Ischemic Stroke	MSTN	Myostatin	Protein Coding	47	GC02M190055	2.51
Ischemic Stroke	UBR3	Ubiquitin Protein Ligase E3 Component N-Recognin 3	Protein Coding	37	GC02P169827	2.51
Ischemic Stroke	ANGPTL4	Angiopoietin Like 4	Protein Coding	47	GC19P008363	2.5
Ischemic Stroke	CHKA	Choline Kinase Alpha	Protein Coding	43	GC11M068052	2.5
Ischemic Stroke	ROS1	ROS Proto-Oncogene 1, Receptor Tyrosine Kinase	Protein Coding	46	GC06M117287	2.49
Ischemic Stroke	SCGN	Secretagogin, EF-Hand Calcium Binding Protein	Protein Coding	40	GC06P025652	2.49
Ischemic Stroke	CXCL10	C-X-C Motif Chemokine Ligand 10	Protein Coding	45	GC04M076021	2.49
Ischemic Stroke	KCNIP4	Potassium Voltage-Gated Channel Interacting Protein 4	Protein Coding	39	GC04M020728	2.49
Ischemic Stroke	STAT4	Signal Transducer And Activator Of Transcription 4	Protein Coding	47	GC02M191029	2.48
Ischemic Stroke	PALLD	Palladin, Cytoskeletal Associated Protein	Protein Coding	43	GC04P168497	2.48
Ischemic Stroke	VAMP8	Vesicle Associated Membrane Protein 8	Protein Coding	42	GC02P085561	2.48
Ischemic Stroke	STRN	Striatin	Protein Coding	40	GC02M036815	2.47
Ischemic Stroke	DAPK1	Death Associated Protein Kinase 1	Protein Coding	50	GC09P087497	2.47
Ischemic Stroke	PTCH1	Patched 1	Protein Coding	51	GC09M095442	2.47
Ischemic Stroke	TBX3	T-Box Transcription Factor 3	Protein Coding	46	GC12M114670	2.47
Ischemic Stroke	CGA	Glycoprotein Hormones, Alpha Polypeptide	Protein Coding	44	GC06M087085	2.47
Ischemic Stroke	VSTM4	V-Set And Transmembrane Domain Containing 4	Protein Coding	32	GC10M049014	2.47
Ischemic Stroke	MYH15	Myosin Heavy Chain 15	Protein Coding	40	GC03M108380	2.46
Ischemic Stroke	SNX19	Sorting Nexin 19	Protein Coding	37	GC11M130894	2.46
Ischemic Stroke	MIR29A	MicroRNA 29a	RNA Gene	22	GC07M130876	2.46
Ischemic Stroke	ICAM4	Intercellular Adhesion Molecule 4 (Landsteiner-Wiener Blood Group)	Protein Coding	37	GC19P010286	2.46
Ischemic Stroke	GABBR1	Gamma-Aminobutyric Acid Type B Receptor Subunit 1	Protein Coding	48	GC06M029555	2.46
Ischemic Stroke	PRRC2A	Proline Rich Coiled-Coil 2A	Protein Coding	34	GC06P033401	2.45
Ischemic Stroke	RTN4R	Reticulon 4 Receptor	Protein Coding	44	GC22M020234	2.45
Ischemic Stroke	MIR181B1	MicroRNA 181b-1	RNA Gene	20	GC01M198858	2.44
Ischemic Stroke	MIR30D	MicroRNA 30d	RNA Gene	17	GC08M134804	2.44
Ischemic Stroke	BCAN	Brevican	Protein Coding	42	GC01P156641	2.44
Ischemic Stroke	SPTB	Spectrin Beta, Erythrocytic	Protein Coding	41	GC14M064746	2.44
Ischemic Stroke	MGAT5	Alpha-1,6-Mannosylglycoprotein 6-Beta-N-Acetylglucosaminyltransferase	Protein Coding	40	GC02P134119	2.44
Ischemic Stroke	SPATA13	Spermatogenesis Associated 13	Protein Coding	38	GC13P024010	2.44
Ischemic Stroke	MIR200C	MicroRNA 200c	RNA Gene	21	GC12P007878	2.44
Ischemic Stroke	ADAMTS7	ADAM Metallopeptidase With Thrombospondin Type 1 Motif 7	Protein Coding	40	GC15M078759	2.44
Ischemic Stroke	CYBRD1	Cytochrome B Reductase 1	Protein Coding	41	GC02P171522	2.43
Ischemic Stroke	PDP1	Pyruvate Dehyrogenase Phosphatase Catalytic Subunit 1	Protein Coding	47	GC08P093857	2.43
Ischemic Stroke	GJB1	Gap Junction Protein Beta 1	Protein Coding	48	GC0XP071215	2.43
Ischemic Stroke	TERC	Telomerase RNA Component	RNA Gene	29	GC03M169765	2.41
Ischemic Stroke	PSMB9	Proteasome 20S Subunit Beta 9	Protein Coding	47	GC06P033443	2.41
Ischemic Stroke	BAG3	BAG Cochaperone 3	Protein Coding	45	GC10P119651	2.41
Ischemic Stroke	LGALS2	Galectin 2	Protein Coding	42	GC22M037570	2.41
Ischemic Stroke	PRKCE	Protein Kinase C Epsilon	Protein Coding	51	GC02P045651	2.4
Ischemic Stroke	ACYP2	Acylphosphatase 2	Protein Coding	41	GC02P053970	2.4
Ischemic Stroke	CD86	CD86 Molecule	Protein Coding	45	GC03P122055	2.4
Ischemic Stroke	FABP1	Fatty Acid Binding Protein 1	Protein Coding	45	GC02M088122	2.4
Ischemic Stroke	SCARB2	Scavenger Receptor Class B Member 2	Protein Coding	45	GC04M076158	2.4
Ischemic Stroke	CSF1R	Colony Stimulating Factor 1 Receptor	Protein Coding	53	GC05M150053	2.4
Ischemic Stroke	CDH11	Cadherin 11	Protein Coding	48	GC16M064882	2.4
Ischemic Stroke	IL2RB	Interleukin 2 Receptor Subunit Beta	Protein Coding	50	GC22M037125	2.39
Ischemic Stroke	PRDX5	Peroxiredoxin 5	Protein Coding	48	GC11P064317	2.39
Ischemic Stroke	MX1	MX Dynamin Like GTPase 1	Protein Coding	42	GC21P041420	2.39
Cerebral Ischemic	FLVCR2	FLVCR Heme Transporter 2	Protein Coding	42	GC14P075578	20.07
Cerebral Ischemic	GAD1	Glutamate Decarboxylase 1	Protein Coding	52	GC02P170813	19.89
Cerebral Ischemic	MEF2C	Myocyte Enhancer Factor 2C	Protein Coding	50	GC05M088718	16.44
Cerebral Ischemic	GAMT	Guanidinoacetate N-Methyltransferase	Protein Coding	47	GC19M001397	15.9
Cerebral Ischemic	PAFAH1B1	Platelet Activating Factor Acetylhydrolase 1b Regulatory Subunit 1	Protein Coding	47	GC17P002593	14.09
Cerebral Ischemic	COL2A1	Collagen Type II Alpha 1 Chain	Protein Coding	50	GC12M047972	13.26
Cerebral Ischemic	MUC1	Mucin 1, Cell Surface Associated	Protein Coding	49	GC01M155185	12.89
Cerebral Ischemic	FGFR1	Fibroblast Growth Factor Receptor 1	Protein Coding	56	GC08M038400	12.5
Cerebral Ischemic	MSH2	MutS Homolog 2	Protein Coding	50	GC02P047402	12.22
Cerebral Ischemic	BMP4	Bone Morphogenetic Protein 4	Protein Coding	50	GC14M053949	12.19
Cerebral Ischemic	SLC6A8	Solute Carrier Family 6 Member 8	Protein Coding	46	GC0XP153688	11.87
Cerebral Ischemic	GATM	Glycine Amidinotransferase	Protein Coding	47	GC15M045361	11.07
Cerebral Ischemic	AP4M1	Adaptor Related Protein Complex 4 Subunit Mu 1	Protein Coding	40	GC07P100101	10.74
Cerebral Ischemic	TPRKB	TP53RK Binding Protein	Protein Coding	39	GC02M073730	10.73
Cerebral Ischemic	CTNNB1	Catenin Beta 1	Protein Coding	54	GC03P041236	10.65
Cerebral Ischemic	NUP107	Nucleoporin 107	Protein Coding	43	GC12P068686	10.64
Cerebral Ischemic	IDS	Iduronate 2-Sulfatase	Protein Coding	50	GC0XM149476	10
Cerebral Ischemic	ABCD1	ATP Binding Cassette Subfamily D Member 1	Protein Coding	47	GC0XP153724	9.97
Cerebral Ischemic	RAP1A	RAP1A, Member Of RAS Oncogene Family	Protein Coding	48	GC01P111542	9.54
Cerebral Ischemic	KCNB1	Potassium Voltage-Gated Channel Subfamily B Member 1	Protein Coding	48	GC20M049293	8.91
Cerebral Ischemic	SPTAN1	Spectrin Alpha, Non-Erythrocytic 1	Protein Coding	49	GC09P128552	8.82
Cerebral Ischemic	PIGT	Phosphatidylinositol Glycan Anchor Biosynthesis Class T	Protein Coding	41	GC20P045416	8.78
Cerebral Ischemic	SHH	Sonic Hedgehog Signaling Molecule	Protein Coding	50	GC07M155799	8.7
Cerebral Ischemic	LAMB1	Laminin Subunit Beta 1	Protein Coding	49	GC07M107923	8.36
Cerebral Ischemic	CDK6	Cyclin Dependent Kinase 6	Protein Coding	55	GC07M092604	8.11
Cerebral Ischemic	CA2	Carbonic Anhydrase 2	Protein Coding	53	GC08P085463	7.98
Cerebral Ischemic	ZNF335	Zinc Finger Protein 335	Protein Coding	38	GC20M045948	7.79
Cerebral Ischemic	PRKCG	Protein Kinase C Gamma	Protein Coding	52	GC19P053879	7.76
Cerebral Ischemic	DKC1	Dyskerin Pseudouridine Synthase 1	Protein Coding	48	GC0XP154762	7.66
Cerebral Ischemic	PLAA	Phospholipase A2 Activating Protein	Protein Coding	44	GC09M026903	7.59
Cerebral Ischemic	ANTXR1	ANTXR Cell Adhesion Molecule 1	Protein Coding	47	GC02P068977	7.45
Cerebral Ischemic	BMPR1A	Bone Morphogenetic Protein Receptor Type 1A	Protein Coding	52	GC10P086756	7.27
Cerebral Ischemic	TOMM40	Translocase Of Outer Mitochondrial Membrane 40	Protein Coding	41	GC19P044890	7.26
Cerebral Ischemic	AFF2	AF4/FMR2 Family Member 2	Protein Coding	43	GC0XP148500	7.25
Cerebral Ischemic	YWHAE	Tyrosine 3-Monooxygenase/Tryptophan 5-Monooxygenase Activation Protein Epsilon	Protein Coding	51	GC17M001346	7.19
Cerebral Ischemic	APC	APC Regulator Of WNT Signaling Pathway	Protein Coding	50	GC05P112707	7.16
Cerebral Ischemic	CCDC8	Coiled-Coil Domain Containing 8	Protein Coding	37	GC19M046410	7.11
Cerebral Ischemic	OCLN	Occludin	Protein Coding	46	GC05P069492	7.1
Cerebral Ischemic	MAP1B	Microtubule Associated Protein 1B	Protein Coding	44	GC05P072107	6.92
Cerebral Ischemic	HSD17B10	Hydroxysteroid 17-Beta Dehydrogenase 10	Protein Coding	47	GC0XM053431	6.88
Cerebral Ischemic	TBCD	Tubulin Folding Cofactor D	Protein Coding	41	GC17P082752	6.88
Cerebral Ischemic	TPP1	Tripeptidyl Peptidase 1	Protein Coding	44	GC11M006614	6.87
Cerebral Ischemic	MAP2K1	Mitogen-Activated Protein Kinase Kinase 1	Protein Coding	55	GC15P066386	6.84
Cerebral Ischemic	LONP1	Lon Peptidase 1, Mitochondrial	Protein Coding	44	GC19M005691	6.78
Cerebral Ischemic	TINF2	TERF1 Interacting Nuclear Factor 2	Protein Coding	41	GC14M024234	6.77
Cerebral Ischemic	GRM1	Glutamate Metabotropic Receptor 1	Protein Coding	52	GC06P145973	6.74
Cerebral Ischemic	RTEL1	Regulator Of Telomere Elongation Helicase 1	Protein Coding	41	GC20P063658	6.72
Cerebral Ischemic	ADNP	Activity Dependent Neuroprotector Homeobox	Protein Coding	43	GC20M050888	6.63
Cerebral Ischemic	BSG	Basigin (Ok Blood Group)	Protein Coding	45	GC19P000571	6.6
Cerebral Ischemic	LAMA2	Laminin Subunit Alpha 2	Protein Coding	44	GC06P128863	6.55
Cerebral Ischemic	ATP7A	ATPase Copper Transporting Alpha	Protein Coding	47	GC0XP077924	6.55
Cerebral Ischemic	IL12B	Interleukin 12B	Protein Coding	45	GC05M159314	6.48
Cerebral Ischemic	CREBBP	CREB Binding Protein	Protein Coding	54	GC16M003726	6.45
Cerebral Ischemic	NF2	Neurofibromin 2	Protein Coding	50	GC22P029603	6.42
Cerebral Ischemic	AKT3	AKT Serine/Threonine Kinase 3	Protein Coding	56	GC01M243488	6.39
Cerebral Ischemic	SDHA	Succinate Dehydrogenase Complex Flavoprotein Subunit A	Protein Coding	48	GC05P000208	6.38
Cerebral Ischemic	SMPD1	Sphingomyelin Phosphodiesterase 1	Protein Coding	49	GC11P006390	6.38
Cerebral Ischemic	LOC102724153	Uncharacterized LOC102724153	RNA Gene	8	GC14M075574	6.37
Cerebral Ischemic	TCF4	Transcription Factor 4	Protein Coding	48	GC18M055222	6.37
Cerebral Ischemic	MLYCD	Malonyl-CoA Decarboxylase	Protein Coding	44	GC16P083899	6.33
Cerebral Ischemic	GCDH	Glutaryl-CoA Dehydrogenase	Protein Coding	47	GC19P012891	6.28
Cerebral Ischemic	CDC42	Cell Division Cycle 42	Protein Coding	53	GC01P022043	6.27
Cerebral Ischemic	CDH23	Cadherin Related 23	Protein Coding	43	GC10P071396	6.16
Cerebral Ischemic	TYMP	Thymidine Phosphorylase	Protein Coding	48	GC22M050525	6.06
Cerebral Ischemic	MIR182	MicroRNA 182	RNA Gene	20	GC07M129770	6.04
Cerebral Ischemic	PARN	Poly(A)-Specific Ribonuclease	Protein Coding	47	GC16M014435	5.97
Cerebral Ischemic	SURF1	SURF1 Cytochrome C Oxidase Assembly Factor	Protein Coding	44	GC09M133351	5.95
Cerebral Ischemic	EP300	E1A Binding Protein P300	Protein Coding	52	GC22P041091	5.89
Cerebral Ischemic	MSH6	MutS Homolog 6	Protein Coding	51	GC02P047695	5.86
Cerebral Ischemic	SGSH	N-Sulfoglucosamine Sulfohydrolase	Protein Coding	45	GC17M080206	5.82
Cerebral Ischemic	SLC12A5	Solute Carrier Family 12 Member 5	Protein Coding	48	GC20P046021	5.8
Cerebral Ischemic	ABAT	4-Aminobutyrate Aminotransferase	Protein Coding	46	GC16P008674	5.77
Cerebral Ischemic	ERCC4	ERCC Excision Repair 4, Endonuclease Catalytic Subunit	Protein Coding	47	GC16P013920	5.77
Cerebral Ischemic	IL23R	Interleukin 23 Receptor	Protein Coding	46	GC01P067138	5.76
Cerebral Ischemic	ARID1B	AT-Rich Interaction Domain 1B	Protein Coding	46	GC06P156777	5.74
Cerebral Ischemic	BLVRB	Biliverdin Reductase B	Protein Coding	41	GC19M040447	5.7
Cerebral Ischemic	CALB2	Calbindin 2	Protein Coding	42	GC16P071392	5.69
Cerebral Ischemic	TJP1	Tight Junction Protein 1	Protein Coding	45	GC15M029699	5.69
Cerebral Ischemic	GLB1	Galactosidase Beta 1	Protein Coding	48	GC03M033013	5.66
Cerebral Ischemic	SMTN	Smoothelin	Protein Coding	40	GC22P031066	5.66
Cerebral Ischemic	HTRA2	HtrA Serine Peptidase 2	Protein Coding	48	GC02P074529	5.64
Cerebral Ischemic	RNF213-AS1	RNF213 Antisense RNA 1	RNA Gene	12	GC17M080335	5.62
Cerebral Ischemic	PIGV	Phosphatidylinositol Glycan Anchor Biosynthesis Class V	Protein Coding	43	GC01P026787	5.61
Cerebral Ischemic	PPP3CA	Protein Phosphatase 3 Catalytic Subunit Alpha	Protein Coding	54	GC04M101024	5.5
Cerebral Ischemic	ALX3	ALX Homeobox 3	Protein Coding	35	GC01M110059	5.47
Cerebral Ischemic	MTHFS	Methenyltetrahydrofolate Synthetase	Protein Coding	45	GC15M079833	5.46
Cerebral Ischemic	COX5A	Cytochrome C Oxidase Subunit 5A	Protein Coding	44	GC15M074919	5.45
Cerebral Ischemic	PANK2	Pantothenate Kinase 2	Protein Coding	45	GC20P003887	5.38
Cerebral Ischemic	WARS2	Tryptophanyl TRNA Synthetase 2, Mitochondrial	Protein Coding	45	GC01M119031	5.36
Cerebral Ischemic	GLI3	GLI Family Zinc Finger 3	Protein Coding	50	GC07M041960	5.35
Cerebral Ischemic	QDPR	Quinoid Dihydropteridine Reductase	Protein Coding	50	GC04M017460	5.33
Cerebral Ischemic	FBLN1	Fibulin 1	Protein Coding	43	GC22P045502	5.32
Cerebral Ischemic	ARID1A	AT-Rich Interaction Domain 1A	Protein Coding	46	GC01P026706	5.25
Cerebral Ischemic	CHD3	Chromodomain Helicase DNA Binding Protein 3	Protein Coding	43	GC17P007966	5.21
Cerebral Ischemic	CTC1	CST Telomere Replication Complex Component 1	Protein Coding	35	GC17M008779	5.21
Cerebral Ischemic	SOX2	SRY-Box Transcription Factor 2	Protein Coding	48	GC03P181711	5.21
Cerebral Ischemic	GABBR2	Gamma-Aminobutyric Acid Type B Receptor Subunit 2	Protein Coding	48	GC09M098288	5.1
Cerebral Ischemic	SLC1A4	Solute Carrier Family 1 Member 4	Protein Coding	45	GC02P064988	5.08
Cerebral Ischemic	GALNS	Galactosamine (N-Acetyl)-6-Sulfatase	Protein Coding	45	GC16M088813	5.03
Cerebral Ischemic	ABCD4	ATP Binding Cassette Subfamily D Member 4	Protein Coding	44	GC14M074285	4.98
Cerebral Ischemic	UBAC2	UBA Domain Containing 2	Protein Coding	38	GC13P099200	4.95
Cerebral Ischemic	KLRC4	Killer Cell Lectin Like Receptor C4	Protein Coding	37	GC12M013373	4.95
Cerebral Ischemic	IL12A-AS1	IL12A Antisense RNA 1	RNA Gene	16	GC03M159913	4.95
Cerebral Ischemic	IKBKG	Inhibitor Of Nuclear Factor Kappa B Kinase Regulatory Subunit Gamma	Protein Coding	50	GC0XP154541	4.94
Cerebral Ischemic	CDK4	Cyclin Dependent Kinase 4	Protein Coding	56	GC12M057743	4.94
Cerebral Ischemic	TIMP3	TIMP Metallopeptidase Inhibitor 3	Protein Coding	47	GC22P032800	4.93
Cerebral Ischemic	GPX4	Glutathione Peroxidase 4	Protein Coding	48	GC19P001103	4.93
Cerebral Ischemic	NTN1	Netrin 1	Protein Coding	46	GC17P009021	4.92
Cerebral Ischemic	ZRANB3	Zinc Finger RANBP2-Type Containing 3	Protein Coding	36	GC02M135136	4.91
Cerebral Ischemic	RB1	RB Transcriptional Corepressor 1	Protein Coding	51	GC13P048303	4.9
Cerebral Ischemic	DCDC2	Doublecortin Domain Containing 2	Protein Coding	40	GC06M024171	4.88
Cerebral Ischemic	SLC13A5	Solute Carrier Family 13 Member 5	Protein Coding	43	GC17M006684	4.88
Cerebral Ischemic	COL18A1	Collagen Type XVIII Alpha 1 Chain	Protein Coding	46	GC21P045405	4.87
Cerebral Ischemic	MOCS1	Molybdenum Cofactor Synthesis 1	Protein Coding	41	GC06M039899	4.87
Cerebral Ischemic	GJB2	Gap Junction Protein Beta 2	Protein Coding	49	GC13M020187	4.83
Cerebral Ischemic	BCL2L11	BCL2 Like 11	Protein Coding	47	GC02P111119	4.81
Cerebral Ischemic	DCC	DCC Netrin 1 Receptor	Protein Coding	47	GC18P052340	4.72
Cerebral Ischemic	PIGG	Phosphatidylinositol Glycan Anchor Biosynthesis Class G	Protein Coding	41	GC04P000486	4.71
Cerebral Ischemic	GSS	Glutathione Synthetase	Protein Coding	48	GC20M034928	4.68
Cerebral Ischemic	PRKAR1A	Protein Kinase CAMP-Dependent Type I Regulatory Subunit Alpha	Protein Coding	53	GC17P068414	4.68
Cerebral Ischemic	SLC4A1	Solute Carrier Family 4 Member 1 (Diego Blood Group)	Protein Coding	48	GC17M044264	4.67
Cerebral Ischemic	SPTBN2	Spectrin Beta, Non-Erythrocytic 2	Protein Coding	43	GC11M066684	4.64
Cerebral Ischemic	HBG2	Hemoglobin Subunit Gamma 2	Protein Coding	43	GC11M005349	4.62
Cerebral Ischemic	EVC2	EvC Ciliary Complex Subunit 2	Protein Coding	40	GC04M005534	4.58
Cerebral Ischemic	TRPM4	Transient Receptor Potential Cation Channel Subfamily M Member 4	Protein Coding	47	GC19P049157	4.56
Cerebral Ischemic	PEX2	Peroxisomal Biogenesis Factor 2	Protein Coding	43	GC08M076980	4.56
Cerebral Ischemic	KLF4	Kruppel Like Factor 4	Protein Coding	47	GC09M107484	4.53
Cerebral Ischemic	CHRNA4	Cholinergic Receptor Nicotinic Alpha 4 Subunit	Protein Coding	50	GC20M063343	4.5
Cerebral Ischemic	SMAD9	SMAD Family Member 9	Protein Coding	47	GC13M036844	4.42
Cerebral Ischemic	TRNP1	TMF1 Regulated Nuclear Protein 1	Protein Coding	33	GC01P026993	4.4
Cerebral Ischemic	PTHLH	Parathyroid Hormone Like Hormone	Protein Coding	47	GC12M027959	4.35
Cerebral Ischemic	RELA	RELA Proto-Oncogene, NF-KB Subunit	Protein Coding	51	GC11M065653	4.33
Cerebral Ischemic	MIR29B1	MicroRNA 29b-1	RNA Gene	22	GC07M130877	4.3
Cerebral Ischemic	MUS81	MUS81 Structure-Specific Endonuclease Subunit	Protein Coding	43	GC11P065878	4.27
Cerebral Ischemic	HLTF	Helicase Like Transcription Factor	Protein Coding	40	GC03M149030	4.27
Cerebral Ischemic	NUP205	Nucleoporin 205	Protein Coding	38	GC07P135557	4.27
Cerebral Ischemic	NXF5	Nuclear RNA Export Factor 5	Protein Coding	33	GC0XM101832	4.27
Cerebral Ischemic	MROH8	Maestro Heat Like Repeat Family Member 8	Protein Coding	30	GC20M037101	4.27
Cerebral Ischemic	DAB1	DAB Adaptor Protein 1	Protein Coding	44	GC01M056994	4.24
Cerebral Ischemic	NHP2	NHP2 Ribonucleoprotein	Protein Coding	44	GC05M178149	4.24
Cerebral Ischemic	NRGN	Neurogranin	Protein Coding	40	GC11P124739	4.18
Cerebral Ischemic	REST	RE1 Silencing Transcription Factor	Protein Coding	45	GC04P056907	4.16
Cerebral Ischemic	PPP2R2B	Protein Phosphatase 2 Regulatory Subunit Bbeta	Protein Coding	47	GC05M146582	4.14
Cerebral Ischemic	CDH2	Cadherin 2	Protein Coding	51	GC18M027950	4.14
Cerebral Ischemic	NUP93	Nucleoporin 93	Protein Coding	42	GC16P056731	4.13
Cerebral Ischemic	BAZ1A	Bromodomain Adjacent To Zinc Finger Domain 1A	Protein Coding	40	GC14M034752	4.13
Cerebral Ischemic	CHRM1	Cholinergic Receptor Muscarinic 1	Protein Coding	47	GC11M063096	4.12
Cerebral Ischemic	CDK5R1	Cyclin Dependent Kinase 5 Regulatory Subunit 1	Protein Coding	47	GC17P032486	4.12
Cerebral Ischemic	MVK	Mevalonate Kinase	Protein Coding	50	GC12P109573	4.09
Cerebral Ischemic	NRG1	Neuregulin 1	Protein Coding	49	GC08P031639	4.06
Cerebral Ischemic	CXCL2	C-X-C Motif Chemokine Ligand 2	Protein Coding	42	GC04M074097	4.06
Cerebral Ischemic	EXT1	Exostosin Glycosyltransferase 1	Protein Coding	48	GC08M117798	4.06
Cerebral Ischemic	NOP10	NOP10 Ribonucleoprotein	Protein Coding	41	GC15M034341	4.05
Cerebral Ischemic	TGIF1	TGFB Induced Factor Homeobox 1	Protein Coding	47	GC18P003411	4.05
Cerebral Ischemic	NPY4R	Neuropeptide Y Receptor Y4	Protein Coding	37	GC10M046461	4.05
Cerebral Ischemic	PIGQ	Phosphatidylinositol Glycan Anchor Biosynthesis Class Q	Protein Coding	43	GC16P001238	4.05
Cerebral Ischemic	PDYN	Prodynorphin	Protein Coding	44	GC20M001978	4.03
Cerebral Ischemic	NDST1	N-Deacetylase And N-Sulfotransferase 1	Protein Coding	47	GC05P150484	4.02
Cerebral Ischemic	PIM1	Pim-1 Proto-Oncogene, Serine/Threonine Kinase	Protein Coding	52	GC06P046065	4.01
Cerebral Ischemic	FDPS	Farnesyl Diphosphate Synthase	Protein Coding	46	GC01P155308	4.01
Cerebral Ischemic	CA5A	Carbonic Anhydrase 5A	Protein Coding	44	GC16M087882	4.01
Cerebral Ischemic	TIPIN	TIMELESS Interacting Protein	Protein Coding	39	GC15M066336	4.01
Cerebral Ischemic	MIR155HG	MIR155 Host Gene	RNA Gene	20	GC21P025561	4.01
Cerebral Ischemic	LOC112806077	Sharpr-MPRA Regulatory Region 13820	Biological Region	2	GC02U904622	4.01
Cerebral Ischemic	ATXN1	Ataxin 1	Protein Coding	45	GC06M016299	4.01
Cerebral Ischemic	CAPN2	Calpain 2	Protein Coding	48	GC01P223701	3.99
Cerebral Ischemic	CAMTA1	Calmodulin Binding Transcription Activator 1	Protein Coding	41	GC01P006845	3.97
Cerebral Ischemic	GNS	Glucosamine (N-Acetyl)-6-Sulfatase	Protein Coding	45	GC12M064713	3.97
Cerebral Ischemic	ELAVL1	ELAV Like RNA Binding Protein 1	Protein Coding	43	GC19M007958	3.96
Cerebral Ischemic	CLDN5	Claudin 5	Protein Coding	43	GC22M019523	3.95
Cerebral Ischemic	FYN	FYN Proto-Oncogene, Src Family Tyrosine Kinase	Protein Coding	50	GC06M111660	3.94
Cerebral Ischemic	HRH1	Histamine Receptor H1	Protein Coding	47	GC03P011113	3.93
Cerebral Ischemic	TNC	Tenascin C	Protein Coding	49	GC09M115019	3.92
Cerebral Ischemic	PSPH	Phosphoserine Phosphatase	Protein Coding	47	GC07M056010	3.92
Cerebral Ischemic	A2M	Alpha-2-Macroglobulin	Protein Coding	46	GC12M009067	3.91
Cerebral Ischemic	SLCO2A1	Solute Carrier Organic Anion Transporter Family Member 2A1	Protein Coding	44	GC03M133932	3.91
Cerebral Ischemic	LRP2	LDL Receptor Related Protein 2	Protein Coding	47	GC02M169127	3.91
Cerebral Ischemic	CEBPB	CCAAT Enhancer Binding Protein Beta	Protein Coding	45	GC20P050190	3.89
Cerebral Ischemic	AARS1	Alanyl-TRNA Synthetase 1	Protein Coding	36	GC16M070257	3.89
Cerebral Ischemic	HADHB	Hydroxyacyl-CoA Dehydrogenase Trifunctional Multienzyme Complex Subunit Beta	Protein Coding	48	GC02P026243	3.89
Cerebral Ischemic	UBTF	Upstream Binding Transcription Factor	Protein Coding	44	GC17M044205	3.88
Cerebral Ischemic	CHRNB2	Cholinergic Receptor Nicotinic Beta 2 Subunit	Protein Coding	45	GC01P154540	3.85
Cerebral Ischemic	FANCG	FA Complementation Group G	Protein Coding	44	GC09M035073	3.85
Cerebral Ischemic	PTK2	Protein Tyrosine Kinase 2	Protein Coding	49	GC08M140657	3.83
Cerebral Ischemic	CD46	CD46 Molecule	Protein Coding	48	GC01P207752	3.82
Cerebral Ischemic	CD44	CD44 Molecule (Indian Blood Group)	Protein Coding	49	GC11P035139	3.82
Cerebral Ischemic	PIGH	Phosphatidylinositol Glycan Anchor Biosynthesis Class H	Protein Coding	41	GC14M067581	3.81
Cerebral Ischemic	NELFA	Negative Elongation Factor Complex Member A	Protein Coding	37	GC04M001985	3.81
Cerebral Ischemic	XRCC4	X-Ray Repair Cross Complementing 4	Protein Coding	44	GC05P083077	3.81
Cerebral Ischemic	TRPS1	Transcriptional Repressor GATA Binding 1	Protein Coding	46	GC08M115408	3.81
Cerebral Ischemic	KLF2	Kruppel Like Factor 2	Protein Coding	41	GC19P022206	3.81
Cerebral Ischemic	EIF2AK3	Eukaryotic Translation Initiation Factor 2 Alpha Kinase 3	Protein Coding	50	GC02M088637	3.79
Cerebral Ischemic	NTNG1	Netrin G1	Protein Coding	41	GC01P107140	3.78
Cerebral Ischemic	ETFA	Electron Transfer Flavoprotein Subunit Alpha	Protein Coding	46	GC15M076215	3.76
Cerebral Ischemic	FGF1	Fibroblast Growth Factor 1	Protein Coding	48	GC05M142555	3.76
Cerebral Ischemic	CELF2	CUGBP Elav-Like Family Member 2	Protein Coding	41	GC10P010796	3.75
Cerebral Ischemic	HPGD	15-Hydroxyprostaglandin Dehydrogenase	Protein Coding	50	GC04M174490	3.75
Cerebral Ischemic	RASIP1	Ras Interacting Protein 1	Protein Coding	37	GC19M048720	3.74
Cerebral Ischemic	CDK1	Cyclin Dependent Kinase 1	Protein Coding	47	GC10P060772	3.74
Cerebral Ischemic	MED23	Mediator Complex Subunit 23	Protein Coding	43	GC06M131573	3.73
Cerebral Ischemic	STX1A	Syntaxin 1A	Protein Coding	48	GC07M073700	3.72
Cerebral Ischemic	MET	MET Proto-Oncogene, Receptor Tyrosine Kinase	Protein Coding	56	GC07P116672	3.72
Cerebral Ischemic	AATF	Apoptosis Antagonizing Transcription Factor	Protein Coding	41	GC17P036948	3.71
Cerebral Ischemic	BECN1	Beclin 1	Protein Coding	48	GC17M042810	3.71
Cerebral Ischemic	PDE4A	Phosphodiesterase 4A	Protein Coding	45	GC19P010416	3.7
Cerebral Ischemic	NIPSNAP3B	Nipsnap Homolog 3B	Protein Coding	35	GC09P104763	3.7
Cerebral Ischemic	ENSG00000249364		Uncategorized	7	GC05P067380	3.69
Cerebral Ischemic	DNMT3A	DNA Methyltransferase 3 Alpha	Protein Coding	52	GC02M025228	3.66
Cerebral Ischemic	DFFB	DNA Fragmentation Factor Subunit Beta	Protein Coding	44	GC01P003797	3.66
Cerebral Ischemic	WDR26	WD Repeat Domain 26	Protein Coding	41	GC01M224385	3.66
Cerebral Ischemic	INA	Internexin Neuronal Intermediate Filament Protein Alpha	Protein Coding	41	GC10P103277	3.65
Cerebral Ischemic	ERBB2	Erb-B2 Receptor Tyrosine Kinase 2	Protein Coding	56	GC17P039687	3.62
Cerebral Ischemic	CAV3	Caveolin 3	Protein Coding	44	GC03P008733	3.62
Cerebral Ischemic	TIMM8A	Translocase Of Inner Mitochondrial Membrane 8A	Protein Coding	43	GC0XM101345	3.61
Cerebral Ischemic	WRAP53	WD Repeat Containing Antisense To TP53	Protein Coding	42	GC17P007950	3.61
Cerebral Ischemic	FADD	Fas Associated Via Death Domain	Protein Coding	48	GC11P070203	3.61
Cerebral Ischemic	IHH	Indian Hedgehog Signaling Molecule	Protein Coding	48	GC02M219054	3.6
Cerebral Ischemic	DROSHA	Drosha Ribonuclease III	Protein Coding	43	GC05M031401	3.6
Cerebral Ischemic	ECI1	Enoyl-CoA Delta Isomerase 1	Protein Coding	41	GC16M002239	3.6
Cerebral Ischemic	ZEB1-AS1	ZEB1 Antisense RNA 1	RNA Gene	17	GC10M031166	3.6
Cerebral Ischemic	ACTA2-AS1	ACTA2 Antisense RNA 1	RNA Gene	16	GC10P088932	3.6
Cerebral Ischemic	HGSNAT	Heparan-Alpha-Glucosaminide N-Acetyltransferase	Protein Coding	39	GC08P043140	3.59
Cerebral Ischemic	AHSP	Alpha Hemoglobin Stabilizing Protein	Protein Coding	37	GC16P031527	3.59
Cerebral Ischemic	PTPA	Protein Phosphatase 2 Phosphatase Activator	Protein Coding	36	GC09P129111	3.55
Cerebral Ischemic	NTF4	Neurotrophin 4	Protein Coding	45	GC19M049061	3.54
Cerebral Ischemic	DPYSL2	Dihydropyrimidinase Like 2	Protein Coding	47	GC08P026514	3.53
Cerebral Ischemic	IL15	Interleukin 15	Protein Coding	42	GC04P141636	3.5
Cerebral Ischemic	SLC5A6	Solute Carrier Family 5 Member 6	Protein Coding	46	GC02M027201	3.5
Cerebral Ischemic	GRM2	Glutamate Metabotropic Receptor 2	Protein Coding	45	GC03P051707	3.5
Cerebral Ischemic	PGM1	Phosphoglucomutase 1	Protein Coding	49	GC01P063593	3.5
Cerebral Ischemic	KRT20	Keratin 20	Protein Coding	43	GC17M040875	3.5
Cerebral Ischemic	RAF1	Raf-1 Proto-Oncogene, Serine/Threonine Kinase	Protein Coding	56	GC03M012583	3.49
Cerebral Ischemic	EFNB1	Ephrin B1	Protein Coding	48	GC0XP068828	3.49
Cerebral Ischemic	PRKCA	Protein Kinase C Alpha	Protein Coding	52	GC17P066302	3.48
Cerebral Ischemic	GREM1	Gremlin 1, DAN Family BMP Antagonist	Protein Coding	45	GC15P032717	3.45
Cerebral Ischemic	MIR361	MicroRNA 361	RNA Gene	17	GC0XM085903	3.45
Cerebral Ischemic	NTRK3	Neurotrophic Receptor Tyrosine Kinase 3	Protein Coding	52	GC15M087859	3.45
Cerebral Ischemic	TNXA	Tenascin XA (Pseudogene)	Pseudogene	24	GC06M032396	3.42
Cerebral Ischemic	VCAN	Versican	Protein Coding	48	GC05P083471	3.41
Cerebral Ischemic	PNPO	Pyridoxamine 5'-Phosphate Oxidase	Protein Coding	46	GC17P047941	3.4
Cerebral Ischemic	BRCA1	BRCA1 DNA Repair Associated	Protein Coding	52	GC17M043044	3.4
Cerebral Ischemic	MMP14	Matrix Metallopeptidase 14	Protein Coding	52	GC14P025005	3.4
Cerebral Ischemic	SMAD1	SMAD Family Member 1	Protein Coding	45	GC04P145481	3.39
Cerebral Ischemic	KCP	Kielin Cysteine Rich BMP Regulator	Protein Coding	33	GC07M128862	3.39
Cerebral Ischemic	GLUD2	Glutamate Dehydrogenase 2	Protein Coding	41	GC0XP121047	3.39
Cerebral Ischemic	SNHG15	Small Nucleolar RNA Host Gene 15	RNA Gene	20	GC07M044983	3.39
Cerebral Ischemic	NDUFA6	NADH:Ubiquinone Oxidoreductase Subunit A6	Protein Coding	45	GC22M042085	3.39
Cerebral Ischemic	ITM2C	Integral Membrane Protein 2C	Protein Coding	39	GC02P230864	3.38
Cerebral Ischemic	GLS	Glutaminase	Protein Coding	48	GC02P190880	3.37
Cerebral Ischemic	YAP1	Yes Associated Protein 1	Protein Coding	49	GC11P102110	3.37
Cerebral Ischemic	USB1	U6 SnRNA Biogenesis Phosphodiesterase 1	Protein Coding	37	GC16P057999	3.36
Cerebral Ischemic	AGL	Amylo-Alpha-1, 6-Glucosidase, 4-Alpha-Glucanotransferase	Protein Coding	45	GC01P099850	3.35
Cerebral Ischemic	ASPG	Asparaginase	Protein Coding	36	GC14P104085	3.35
Cerebral Ischemic	MKI67	Marker Of Proliferation Ki-67	Protein Coding	44	GC10M128096	3.34
Cerebral Ischemic	GGPS1	Geranylgeranyl Diphosphate Synthase 1	Protein Coding	45	GC01P235327	3.34
Cerebral Ischemic	YME1L1	YME1 Like 1 ATPase	Protein Coding	43	GC10M027110	3.34
Cerebral Ischemic	USP6	Ubiquitin Specific Peptidase 6	Protein Coding	40	GC17P005116	3.34
Cerebral Ischemic	TMEM126A	Transmembrane Protein 126A	Protein Coding	39	GC11P085647	3.34
Cerebral Ischemic	LINC00336	Long Intergenic Non-Protein Coding RNA 336	RNA Gene	24	GC06M033586	3.34
Cerebral Ischemic	SNHG6	Small Nucleolar RNA Host Gene 6	RNA Gene	17	GC08M066921	3.34
Cerebral Ischemic	LINC00323	Long Intergenic Non-Protein Coding RNA 323	RNA Gene	17	GC21M041141	3.34
Cerebral Ischemic	LEF1-AS1	LEF1 Antisense RNA 1	RNA Gene	17	GC04P108167	3.34
Cerebral Ischemic	LINC00596	Long Intergenic Non-Protein Coding RNA 596	RNA Gene	17	GC14M023839	3.34
Cerebral Ischemic	LINC00667	Long Intergenic Non-Protein Coding RNA 667	RNA Gene	17	GC18P005233	3.34
Cerebral Ischemic	FAM66B	Family With Sequence Similarity 66 Member B	RNA Gene	16	GC08M007303	3.34
Cerebral Ischemic	TTTY7	Testis-Specific Transcript, Y-Linked 7	RNA Gene	16	GC0YP006449	3.34
Cerebral Ischemic	LINC01139	Long Intergenic Non-Protein Coding RNA 1139	RNA Gene	16	GC01M238480	3.34
Cerebral Ischemic	LINC01020	Long Intergenic Non-Protein Coding RNA 1020	RNA Gene	16	GC05P004987	3.34
Cerebral Ischemic	SPRY4-AS1	SPRY4 Antisense RNA 1	RNA Gene	14	GC05P142881	3.34
Cerebral Ischemic	SMIM2-IT1	SMIM2 Intronic Transcript 1	RNA Gene	14	GC13M044146	3.34
Cerebral Ischemic	LINC01798	Long Intergenic Non-Protein Coding RNA 1798	RNA Gene	13	GC02P066576	3.34
Cerebral Ischemic	TTLL11-IT1	TTLL11 Intronic Transcript 1	RNA Gene	13	GC09M121884	3.34
Cerebral Ischemic	LINC00929	Long Intergenic Non-Protein Coding RNA 929	RNA Gene	13	GC15P026241	3.34
Cerebral Ischemic	LINC01538	Long Intergenic Non-Protein Coding RNA 1538	RNA Gene	13	GC18M064213	3.34
Cerebral Ischemic	LINC01204	Long Intergenic Non-Protein Coding RNA 1204	RNA Gene	13	GC0XP045505	3.34
Cerebral Ischemic	LINC01721	Long Intergenic Non-Protein Coding RNA 1721	RNA Gene	11	GC20P024063	3.34
Cerebral Ischemic	LINC01762	Long Intergenic Non-Protein Coding RNA 1762	RNA Gene	10	GC01M116424	3.34
Cerebral Ischemic	ENSG00000250195		Uncategorized	9	GC04M138819	3.34
Cerebral Ischemic	ENSG00000249772		RNA Gene	9	GC05M081113	3.34
Cerebral Ischemic	ENSG00000203325		RNA Gene	9	GC01M032052	3.34
Cerebral Ischemic	ENSG00000270659		RNA Gene	9	GC02P213152	3.34
Cerebral Ischemic	ENSG00000241269		RNA Gene	8	GC07P005419	3.34
Cerebral Ischemic	ENSG00000206129		Uncategorized	8	GC18M056004	3.34
Cerebral Ischemic	ENSG00000248176		RNA Gene	7	GC04P029119	3.34
Cerebral Ischemic	ENSG00000233251		Uncategorized	6	GC02M056174	3.34
Cerebral Ischemic	ENSG00000256218		RNA Gene	6	GC12M005366	3.34
Cerebral Ischemic	ENSG00000280339		Uncategorized	5	GC11M086908	3.34
Cerebral Ischemic	TCN2	Transcobalamin 2	Protein Coding	45	GC22P030606	3.32
Cerebral Ischemic	CANT1	Calcium Activated Nucleotidase 1	Protein Coding	44	GC17M078992	3.32
Cerebral Ischemic	FGF13	Fibroblast Growth Factor 13	Protein Coding	43	GC0XM138615	3.32
Cerebral Ischemic	HRH2	Histamine Receptor H2	Protein Coding	45	GC05P175659	3.31
Cerebral Ischemic	ACD	ACD Shelterin Complex Subunit And Telomerase Recruitment Factor	Protein Coding	44	GC16M067658	3.3
Cerebral Ischemic	CTBP1	C-Terminal Binding Protein 1	Protein Coding	48	GC04M001211	3.3
Cerebral Ischemic	STUB1	STIP1 Homology And U-Box Containing Protein 1	Protein Coding	47	GC16P001253	3.3
Cerebral Ischemic	COL9A1	Collagen Type IX Alpha 1 Chain	Protein Coding	43	GC06M070215	3.29
Cerebral Ischemic	COL9A3	Collagen Type IX Alpha 3 Chain	Protein Coding	43	GC20P062816	3.29
Cerebral Ischemic	NLRP5	NLR Family Pyrin Domain Containing 5	Protein Coding	37	GC19P056000	3.29
Cerebral Ischemic	RIPK1	Receptor Interacting Serine/Threonine Kinase 1	Protein Coding	50	GC06P003064	3.28
Cerebral Ischemic	CASP7	Caspase 7	Protein Coding	51	GC10P113679	3.28
Cerebral Ischemic	PRDX1	Peroxiredoxin 1	Protein Coding	51	GC01M045511	3.27
Cerebral Ischemic	SOX9	SRY-Box Transcription Factor 9	Protein Coding	48	GC17P072121	3.25
Cerebral Ischemic	CYP46A1	Cytochrome P450 Family 46 Subfamily A Member 1	Protein Coding	42	GC14P099684	3.24
Cerebral Ischemic	TDP1	Tyrosyl-DNA Phosphodiesterase 1	Protein Coding	45	GC14P089954	3.24
Cerebral Ischemic	MAPK8IP1	Mitogen-Activated Protein Kinase 8 Interacting Protein 1	Protein Coding	45	GC11P045961	3.22
Cerebral Ischemic	SLC6A9	Solute Carrier Family 6 Member 9	Protein Coding	49	GC01M043991	3.22
Cerebral Ischemic	GNRH1	Gonadotropin Releasing Hormone 1	Protein Coding	43	GC08M025419	3.22
Cerebral Ischemic	NID1	Nidogen 1	Protein Coding	43	GC01M235975	3.22
Cerebral Ischemic	SLC22A5	Solute Carrier Family 22 Member 5	Protein Coding	48	GC05P132369	3.21
Cerebral Ischemic	SLC25A4	Solute Carrier Family 25 Member 4	Protein Coding	48	GC04P185143	3.2
Cerebral Ischemic	MYOC	Myocilin	Protein Coding	43	GC01M171604	3.19
Cerebral Ischemic	FOSB	FosB Proto-Oncogene, AP-1 Transcription Factor Subunit	Protein Coding	43	GC19P045467	3.19
Cerebral Ischemic	MAPKAPK2	MAPK Activated Protein Kinase 2	Protein Coding	50	GC01P206684	3.19
Cerebral Ischemic	VDAC1	Voltage Dependent Anion Channel 1	Protein Coding	47	GC05M133975	3.18
Cerebral Ischemic	SPTBN4	Spectrin Beta, Non-Erythrocytic 4	Protein Coding	39	GC19P040466	3.18
Cerebral Ischemic	HSPA14	Heat Shock Protein Family A (Hsp70) Member 14	Protein Coding	40	GC10P014790	3.18
Cerebral Ischemic	PPP2CA	Protein Phosphatase 2 Catalytic Subunit Alpha	Protein Coding	50	GC05M134194	3.17
Cerebral Ischemic	PAK1	P21 (RAC1) Activated Kinase 1	Protein Coding	49	GC11M077321	3.17
Cerebral Ischemic	PLK4	Polo Like Kinase 4	Protein Coding	48	GC04P127880	3.16
Cerebral Ischemic	TFG	Trafficking From ER To Golgi Regulator	Protein Coding	46	GC03P100709	3.15
Cerebral Ischemic	NOG	Noggin	Protein Coding	45	GC17P056593	3.14
Cerebral Ischemic	IL1RAPL2	Interleukin 1 Receptor Accessory Protein Like 2	Protein Coding	38	GC0XP104566	3.12
Cerebral Ischemic	MUTYH	MutY DNA Glycosylase	Protein Coding	47	GC01M045329	3.11
Cerebral Ischemic	NDUFA13	NADH:Ubiquinone Oxidoreductase Subunit A13	Protein Coding	45	GC19P019515	3.1
Cerebral Ischemic	PIK3R1	Phosphoinositide-3-Kinase Regulatory Subunit 1	Protein Coding	52	GC05P068215	3.1
Cerebral Ischemic	TFRC	Transferrin Receptor	Protein Coding	50	GC03M196027	3.09
Cerebral Ischemic	CLCN7	Chloride Voltage-Gated Channel 7	Protein Coding	47	GC16M001444	3.09
Cerebral Ischemic	GNPTAB	N-Acetylglucosamine-1-Phosphate Transferase Subunits Alpha And Beta	Protein Coding	42	GC12M101745	3.08
Cerebral Ischemic	CXCL11	C-X-C Motif Chemokine Ligand 11	Protein Coding	41	GC04M076033	3.06
Cerebral Ischemic	EPHA4	EPH Receptor A4	Protein Coding	50	GC02M221418	3.06
Cerebral Ischemic	THSD1	Thrombospondin Type 1 Domain Containing 1	Protein Coding	40	GC13M052377	3.06
Cerebral Ischemic	RHOD	Ras Homolog Family Member D	Protein Coding	40	GC11P067057	3.05
Cerebral Ischemic	COMP	Cartilage Oligomeric Matrix Protein	Protein Coding	48	GC19M018783	3.04
Cerebral Ischemic	LOC111365141	NOS2 5' Regulatory Region	Biological Region	2	GC17U902748	3.03
Cerebral Ischemic	AGRN	Agrin	Protein Coding	45	GC01P001020	3.03
Cerebral Ischemic	NR1H2	Nuclear Receptor Subfamily 1 Group H Member 2	Protein Coding	49	GC19P050329	3.03
Cerebral Ischemic	CFHR2	Complement Factor H Related 2	Protein Coding	37	GC01P196943	3.02
Cerebral Ischemic	LYPD1	LY6/PLAUR Domain Containing 1	Protein Coding	37	GC02M132644	3.02
Cerebral Ischemic	IGSF6	Immunoglobulin Superfamily Member 6	Protein Coding	36	GC16M021639	3.02
Cerebral Ischemic	CALML4	Calmodulin Like 4	Protein Coding	35	GC15M068190	3.02
Cerebral Ischemic	COQ8B	Coenzyme Q8B	Protein Coding	33	GC19M041470	3.02
Cerebral Ischemic	AIP	Aryl Hydrocarbon Receptor Interacting Protein	Protein Coding	45	GC11P067483	3.02
Cerebral infarction	PLP1	Proteolipid Protein 1	Protein Coding	44	GC0XP103773	26.26
Cerebral infarction	LRP8	LDL Receptor Related Protein 8	Protein Coding	47	GC01M053243	24.41
Cerebral infarction	MCPH1	Microcephalin 1	Protein Coding	42	GC08P006406	19.88
Cerebral infarction	CEP152	Centrosomal Protein 152	Protein Coding	41	GC15M048663	17.79
Cerebral infarction	LRP6	LDL Receptor Related Protein 6	Protein Coding	49	GC12M013402	17.38
Cerebral infarction	RAP1B	RAP1B, Member Of RAS Oncogene Family	Protein Coding	47	GC12P068610	16.72
Cerebral infarction	CDK5RAP2	CDK5 Regulatory Subunit Associated Protein 2	Protein Coding	43	GC09M120388	16.7
Cerebral infarction	CEP135	Centrosomal Protein 135	Protein Coding	40	GC04P055948	16.63
Cerebral infarction	CENPJ	Centromere Protein J	Protein Coding	43	GC13M024882	16.59
Cerebral infarction	STIL	STIL Centriolar Assembly Protein	Protein Coding	42	GC01M047250	16.04
Cerebral infarction	C1S	Complement C1s	Protein Coding	47	GC12P007884	16
Cerebral infarction	STXBP1	Syntaxin Binding Protein 1	Protein Coding	50	GC09P127581	15.01
Cerebral infarction	PAX6	Paired Box 6	Protein Coding	49	GC11M031784	14.42
Cerebral infarction	HLA-A	Major Histocompatibility Complex, Class I, A	Protein Coding	48	GC06P033211	14.29
Cerebral infarction	MLX	MAX Dimerization Protein MLX	Protein Coding	44	GC17P042567	14.27
Cerebral infarction	MEF2A	Myocyte Enhancer Factor 2A	Protein Coding	48	GC15P099565	14.15
Cerebral infarction	ABCG5	ATP Binding Cassette Subfamily G Member 5	Protein Coding	44	GC02M043806	13.12
Cerebral infarction	ATN1	Atrophin 1	Protein Coding	45	GC12P007874	13.1
Cerebral infarction	CYP27A1	Cytochrome P450 Family 27 Subfamily A Member 1	Protein Coding	48	GC02P218781	13.07
Cerebral infarction	ATRIP	ATR Interacting Protein	Protein Coding	43	GC03P048449	12.82
Cerebral infarction	TBL2	Transducin Beta Like 2	Protein Coding	40	GC07M073568	12.7
Cerebral infarction	CASK	Calcium/Calmodulin Dependent Serine Protein Kinase	Protein Coding	50	GC0XM041514	12.56
Cerebral infarction	CLIP2	CAP-Gly Domain Containing Linker Protein 2	Protein Coding	39	GC07P074289	12.55
Cerebral infarction	HRAS	HRas Proto-Oncogene, GTPase	Protein Coding	53	GC11M000522	12.53
Cerebral infarction	RFC2	Replication Factor C Subunit 2	Protein Coding	45	GC07M074231	12.5
Cerebral infarction	SLC20A2	Solute Carrier Family 20 Member 2	Protein Coding	47	GC08M042416	12.38
Cerebral infarction	NRXN1	Neurexin 1	Protein Coding	48	GC02M049918	12.34
Cerebral infarction	DPM1	Dolichyl-Phosphate Mannosyltransferase Subunit 1, Catalytic	Protein Coding	45	GC20M050934	12.25
Cerebral infarction	GABRA1	Gamma-Aminobutyric Acid Type A Receptor Subunit Alpha1	Protein Coding	48	GC05P161847	12.24
Cerebral infarction	RAD51	RAD51 Recombinase	Protein Coding	52	GC15P040694	12.2
Cerebral infarction	EHHADH	Enoyl-CoA Hydratase And 3-Hydroxyacyl CoA Dehydrogenase	Protein Coding	45	GC03M185190	12.06
Cerebral infarction	ATRIP-TREX1	ATRIP-TREX1 Readthrough	RNA Gene	2	GC03U903220	11.91
Cerebral infarction	POSTN	Periostin	Protein Coding	45	GC13M037562	11.8
Cerebral infarction	BAZ1B	Bromodomain Adjacent To Zinc Finger Domain 1B	Protein Coding	41	GC07M073440	11.62
Cerebral infarction	GTF2IRD1	GTF2I Repeat Domain Containing 1	Protein Coding	43	GC07P074455	11.56
Cerebral infarction	GTF2I	General Transcription Factor IIi	Protein Coding	43	GC07P074658	11.5
Cerebral infarction	GP1BB	Glycoprotein Ib Platelet Subunit Beta	Protein Coding	43	GC22P019722	11.49
Cerebral infarction	DYRK1A	Dual Specificity Tyrosine Phosphorylation Regulated Kinase 1A	Protein Coding	52	GC21P037365	11.34
Cerebral infarction	NSD1	Nuclear Receptor Binding SET Domain Protein 1	Protein Coding	44	GC05P177134	11.26
Cerebral infarction	IL17F	Interleukin 17F	Protein Coding	43	GC06M052209	11
Cerebral infarction	DNM1	Dynamin 1	Protein Coding	52	GC09P128191	10.99
Cerebral infarction	CYP7B1	Cytochrome P450 Family 7 Subfamily B Member 1	Protein Coding	47	GC08M064587	10.83
Cerebral infarction	BSCL2	BSCL2 Lipid Droplet Biogenesis Associated, Seipin	Protein Coding	43	GC11M063080	10.78
Cerebral infarction	THBS4	Thrombospondin 4	Protein Coding	44	GC05P079991	10.66
Cerebral infarction	AHCY	Adenosylhomocysteinase	Protein Coding	51	GC20M034257	10.63
Cerebral infarction	ABCA7	ATP Binding Cassette Subfamily A Member 7	Protein Coding	44	GC19P001040	10.63
Cerebral infarction	AHDC1	AT-Hook DNA Binding Motif Containing 1	Protein Coding	37	GC01M027546	10.48
Cerebral infarction	THBS2	Thrombospondin 2	Protein Coding	47	GC06M169215	10.41
Cerebral infarction	MAP2K2	Mitogen-Activated Protein Kinase Kinase 2	Protein Coding	55	GC19M004090	10.37
Cerebral infarction	SMO	Smoothened, Frizzled Class Receptor	Protein Coding	50	GC07P129303	10.27
Cerebral infarction	NRAS	NRAS Proto-Oncogene, GTPase	Protein Coding	51	GC01M114704	10.23
Cerebral infarction	MECP2	Methyl-CpG Binding Protein 2	Protein Coding	47	GC0XM154021	10.14
Cerebral infarction	SUFU	SUFU Negative Regulator Of Hedgehog Signaling	Protein Coding	44	GC10P102503	9.88
Cerebral infarction	KIDINS220	Kinase D Interacting Substrate 220	Protein Coding	41	GC02M008715	9.87
Cerebral infarction	LZTR1	Leucine Zipper Like Transcription Regulator 1	Protein Coding	44	GC22P020979	9.87
Cerebral infarction	LDLRAP1	Low Density Lipoprotein Receptor Adaptor Protein 1	Protein Coding	43	GC01P025574	9.87
Cerebral infarction	NBN	Nibrin	Protein Coding	49	GC08M089933	9.8
Cerebral infarction	CFTR	CF Transmembrane Conductance Regulator	Protein Coding	52	GC07P117465	9.74
Cerebral infarction	POMT1	Protein O-Mannosyltransferase 1	Protein Coding	45	GC09P131502	9.68
Cerebral infarction	HLA-DPB1	Major Histocompatibility Complex, Class II, DP Beta 1	Protein Coding	45	GC06P033447	9.61
Cerebral infarction	POMT2	Protein O-Mannosyltransferase 2	Protein Coding	44	GC14M077274	9.55
Cerebral infarction	SPATA5	Spermatogenesis Associated 5	Protein Coding	41	GC04P122923	9.55
Cerebral infarction	PIGM	Phosphatidylinositol Glycan Anchor Biosynthesis Class M	Protein Coding	39	GC01M160027	9.5
Cerebral infarction	PCSK2	Proprotein Convertase Subtilisin/Kexin Type 2	Protein Coding	42	GC20P017226	9.49
[truncated: 393 more rows]

## Sheet: disgenet
Table S2-2 IS related targets in DisGeNET
Disease	Gene	Gene_id	UniProt	Gene_Full_Name	Protein_Class	N_diseases_g	DSI_g	DPI_g	pLI	Score_gda
Ischemic stroke	NOTCH3	4854	Q9UM47	notch 3		312	0.469	0.69	0.86965	0.16
Ischemic stroke	ENG	2022	P17813	endoglin		249	0.477	0.655	0.99877	0.11
Ischemic stroke	COL4A1	1282	P02462	collagen type IV alpha 1 chain		210	0.512	0.69	1	0.11
Ischemic stroke	CRP	1401	P02741	C-reactive protein		470	0.399	0.862	0.0037357	0.1
Ischemic stroke	SLC2A10	81031	O95528	solute carrier family 2 member 10	transporter	99	0.594	0.621	2.3828e-08	0.1
Ischemic stroke	PDE4D	5144	Q08499	phosphodiesterase 4D		168	0.572	0.69	0.99996	0.1
Ischemic stroke	F2	2147	P00734	coagulation factor II, thrombin	hydrolase; protease	249	0.466	0.793	0.0011245	0.1
Ischemic stroke	APOE	348	P02649	apolipoprotein E		770	0.352	0.931	0.0017371	0.1
Ischemic stroke	ALOX5AP	241	P20292	arachidonate 5-lipoxygenase activating protein	transferase	53	0.633	0.552	0.080972	0.1
Ischemic stroke	NOS3	4846	P29474	nitric oxide synthase 3		467	0.401	0.862	8.8921e-07	0.1
Ischemic stroke	MTHFR	4524	P42898	methylenetetrahydrofolate reductase		699	0.354	0.828	1.2191e-09	0.1
Ischemic stroke	C20orf181	100128998		chromosome 20 open reading frame 181		97	0.557	0.69		0.1
Ischemic stroke	ACE	1636	P12821	angiotensin I converting enzyme	hydrolase; protease	624	0.367	0.897	1.5509e-37	0.1
Ischemic stroke	IL6	3569	P05231	interleukin 6		1330	0.287	0.966	0.33873	0.1
Ischemic stroke	F5	2153	P12259	coagulation factor V	cell adhesion molecule; hydrolase; receptor; signaling molecule	259	0.468	0.69	5.587e-15	0.1
Ischemic stroke	ACVRL1	94	P37023	activin A receptor like type 1	kinase; receptor; transferase	130	0.57	0.621	0.00082348	0.1
Ischemic stroke	FBN1	2200	P35555	fibrillin 1	calcium-binding protein; cell adhesion molecule; extracellular matrix protein; signaling molecule	413	0.469	0.69	1	0.1
Ischemic stroke	PLAT	5327	P00750	plasminogen activator, tissue type	hydrolase; protease	267	0.459	0.828	3.4642e-05	0.09
Ischemic stroke	TNF	7124	P01375	tumor necrosis factor	signaling molecule	1640	0.263	0.966	0.8046	0.09
Ischemic stroke	PON1	5444	P27169	paraoxonase 1		324	0.443	0.828	8.9806e-11	0.09
Ischemic stroke	SERPINE1	5054	P05121	serpin family E member 1	enzyme modulator	506	0.384	0.793	0.047491	0.09
Ischemic stroke	LPL	4023	P06858	lipoprotein lipase	hydrolase; storage protein	203	0.504	0.724	7.2264e-10	0.08
Ischemic stroke	ESR1	2099	P03372	estrogen receptor 1	nucleic acid binding; receptor; transcription factor	686	0.355	0.897	0.9994	0.08
Ischemic stroke	ALOX5	240	P09917	arachidonate 5-lipoxygenase	oxidoreductase	214	0.482	0.724	1.4969e-06	0.08
Ischemic stroke	AGTR1	185	P30556	angiotensin II receptor type 1	receptor	273	0.454	0.759	0.0005718	0.08
Ischemic stroke	PTGS2	5743	P35354	prostaglandin-endoperoxide synthase 2	oxidoreductase	832	0.338	0.897	0.99639	0.07
Ischemic stroke	IL10	3586	P22301	interleukin 10		961	0.32	0.931	0.0065063	0.07
Ischemic stroke	PRH2	5555	P02810	proline rich protein HaeIII subfamily 2		190	0.48	0.759	0.073818	0.06
Ischemic stroke	LPA	4018	P08519	lipoprotein(a)	hydrolase; protease	198	0.489	0.655	5.8068e-88	0.06
Ischemic stroke	IL1RN	3557	P18510	interleukin 1 receptor antagonist		475	0.398	0.897	0.033509	0.06
Ischemic stroke	VWF	7450	P04275	von Willebrand factor	enzyme modulator	260	0.462	0.724	7.8464e-24	0.06
Ischemic stroke	VEGFA	7422	P15692	vascular endothelial growth factor A	signaling molecule	1174	0.298	0.897	2.651e-05	0.05
Ischemic stroke	IL1B	3553	P01584	interleukin 1 beta		1035	0.312	0.931	0.12568	0.05
Ischemic stroke	EPHX2	2053	P34913	epoxide hydrolase 2	hydrolase; protease	47	0.633	0.448	1.3959e-21	0.05
Ischemic stroke	BDNF	627	P23560	brain derived neurotrophic factor	signaling molecule	591	0.382	0.828	0.69969	0.05
Ischemic stroke	AGT	183	P01019	angiotensinogen	enzyme modulator	451	0.406	0.862	3.8655e-08	0.05
Ischemic stroke	HDAC9	9734	Q9UKV0	histone deacetylase 9		162	0.501	0.759	0.99996	0.05
Ischemic stroke	MIR146A	406938		microRNA 146a		248	0.452	0.759		0.05
Ischemic stroke	F7	2155	P08709	coagulation factor VII	hydrolase; protease	137	0.547	0.69	1.5257e-05	0.05
Ischemic stroke	SELE	6401	P16581	selectin E		208	0.479	0.793	7.0237e-10	0.04
Ischemic stroke	MMP9	4318	P14780	matrix metallopeptidase 9	hydrolase; protease	790	0.339	0.862	7.0286e-18	0.04
Ischemic stroke	FGB	2244	P02675	fibrinogen beta chain	signaling molecule	75	0.604	0.552	0.57113	0.04
Ischemic stroke	LTA	4049	P01374	lymphotoxin alpha	signaling molecule	228	0.463	0.862	0.55529	0.04
Ischemic stroke	PRKCH	5583	P24723	protein kinase C eta	calcium-binding protein; kinase; transfer/carrier protein; transferase	34	0.676	0.483	0.54514	0.04
Ischemic stroke	APOA5	116519	Q6Q788	apolipoprotein A5		67	0.609	0.483	9.0462e-10	0.04
Ischemic stroke	F3	2152	P13726	coagulation factor III, tissue factor	defense/immunity protein; receptor	267	0.458	0.724	0.01473	0.03
Ischemic stroke	CYP4F2	8529	P78329	cytochrome P450 family 4 subfamily F member 2	oxidoreductase	23	0.727	0.276	9.3333e-17	0.03
Ischemic stroke	PPARG	5468	P37231	peroxisome proliferator activated receptor gamma	nucleic acid binding; receptor; transcription factor	540	0.388	0.828	0.1447	0.03
Ischemic stroke	NPY	4852	P01303	neuropeptide Y	signaling molecule	243	0.469	0.69	0.15508	0.03
Ischemic stroke	NPPA	4878	P01160	natriuretic peptide A		127	0.546	0.69	0.00063899	0.03
Ischemic stroke	CYP2C19	1557	P33261	cytochrome P450 family 2 subfamily C member 19		176	0.501	0.793	4.1125e-20	0.03
Ischemic stroke	PLG	5340	P00747	plasminogen	hydrolase; protease	393	0.419	0.862	0.0096423	0.03
Ischemic stroke	CFH	3075	P08603	complement factor H		225	0.478	0.793	0.96239	0.03
Ischemic stroke	HMOX1	3162	P09601	heme oxygenase 1	oxidoreductase	460	0.403	0.862	0.0078856	0.03
Ischemic stroke	HFE	3077	Q30201	homeostatic iron regulator		334	0.44	0.69	3.0065e-08	0.03
Ischemic stroke	TLR4	7099	O00206	toll like receptor 4		674	0.359	0.931	5.5849e-09	0.03
Ischemic stroke	CPB2	1361	Q96IY4	carboxypeptidase B2	hydrolase; protease	80	0.594	0.586	2.9644e-17	0.03
Ischemic stroke	AGER	177	Q15109	advanced glycosylation end-product specific receptor	cell adhesion molecule; receptor	232	0.472	0.724	3.4363e-16	0.03
Ischemic stroke	APOB	338	P04114	apolipoprotein B		232	0.477	0.724	1.6447e-16	0.03
Ischemic stroke	CXCL8	3576	P10145	C-X-C motif chemokine ligand 8	signaling molecule	758	0.342	0.862		0.03
Ischemic stroke	MMP3	4314	P08254	matrix metallopeptidase 3	hydrolase; protease	309	0.439	0.793	4.9293e-15	0.03
Ischemic stroke	SELP	6403	P16109	selectin P		151	0.519	0.724	4.2701e-32	0.03
Ischemic stroke	NINJ2	4815	Q9NZG7	ninjurin 2	cell adhesion molecule	13	0.834	0.103	0.001235	0.03
Ischemic stroke	LTC4S	4056	Q16873	leukotriene C4 synthase	transferase	47	0.656	0.483	0.00077145	0.03
Ischemic stroke	CDKN2A	1029	P42771;Q8N726	cyclin dependent kinase inhibitor 2A		891	0.321	0.828	0.38138	0.03
Ischemic stroke	CDKN2B	1030	P42772	cyclin dependent kinase inhibitor 2B		300	0.438	0.759	0.0081847	0.03
Ischemic stroke	CETP	1071	P11597	cholesteryl ester transfer protein		116	0.555	0.655	1.0293e-23	0.03
Ischemic stroke	GLA	2717	P06280	galactosidase alpha		135	0.588	0.621	0.99705	0.02
Ischemic stroke	TNFRSF12A	51330	Q9NP84	TNF receptor superfamily member 12A		100	0.547	0.586	0.087478	0.02
Ischemic stroke	PON2	5445	Q15165	paraoxonase 2		80	0.596	0.621	6.0565e-05	0.02
Ischemic stroke	FGG	2266	P02679	fibrinogen gamma chain	signaling molecule	45	0.681	0.379	0.062734	0.02
Ischemic stroke	CELSR1	9620	Q9NYQ6	cadherin EGF LAG seven-pass G-type receptor 1	cell adhesion molecule; hydrolase; protease; receptor	12	0.762	0.345	0.99999	0.02
Ischemic stroke	LDLR	3949	P01130	low density lipoprotein receptor		229	0.475	0.828	9.4405e-24	0.02
Ischemic stroke	FGA	2243	P02671	fibrinogen alpha chain		95	0.594	0.586	1.9921e-13	0.02
Ischemic stroke	LLGL2	3993	Q6P1M3	LLGL2, scribble cell polarity complex component	membrane traffic protein	14	0.785	0.172	1.7324e-11	0.02
Ischemic stroke	LTA4H	4048	P09960	leukotriene A4 hydrolase		49	0.636	0.483	2.2331e-08	0.02
Ischemic stroke	MMP1	4312	P03956	matrix metallopeptidase 1	hydrolase; protease	388	0.415	0.793	6.2409e-18	0.02
Ischemic stroke	PPARA	5465	Q07869	peroxisome proliferator activated receptor alpha	nucleic acid binding; receptor; transcription factor	247	0.465	0.793	0.037307	0.02
Ischemic stroke	TNFRSF11B	4982	O00300	TNF receptor superfamily member 11b		270	0.467	0.69	0.21052	0.02
Ischemic stroke	IFNB1	3456	P01574	interferon beta 1		236	0.466	0.793		0.02
Ischemic stroke	IGF1	3479	P05019	insulin like growth factor 1		715	0.355	0.828	0.28843	0.02
Ischemic stroke	IL1A	3552	P01583	interleukin 1 alpha		596	0.366	0.931	0.00014857	0.02
Ischemic stroke	IL5	3567	P05113	interleukin 5		232	0.463	0.828	0.0062161	0.02
Ischemic stroke	MMRN1	22915	Q13201	multimerin 1	extracellular matrix protein	137	0.523	0.655	2.251e-24	0.02
Ischemic stroke	IL17A	3605	Q16552	interleukin 17A		468	0.391	0.862	0.044037	0.02
Ischemic stroke	ITGA2	3673	P17301	integrin subunit alpha 2		102	0.565	0.655	8.0901e-11	0.02
Ischemic stroke	RUVBL2	10856	Q9Y230	RuvB like AAA ATPase 2		11	0.799	0.276	0.99993	0.02
Ischemic stroke	ITGB3	3690	P05106	integrin subunit beta 3	cell adhesion molecule; extracellular matrix protein; receptor	175	0.507	0.69	0.002193	0.02
Ischemic stroke	HABP2	3026	Q14520	hyaluronan binding protein 2	hydrolase; protease	49	0.639	0.448	6.1692e-15	0.02
Ischemic stroke	GRIA2	2891	P42262	glutamate ionotropic receptor AMPA type subunit 2		52	0.639	0.414	0.99906	0.02
Ischemic stroke	OLR1	4973	P78380	oxidized low density lipoprotein receptor 1		74	0.59	0.552	0.0088964	0.02
Ischemic stroke	GP6	51206	Q9HCN6	glycoprotein VI platelet	defense/immunity protein; enzyme modulator; receptor	55	0.639	0.448	1.5587e-11	0.02
Ischemic stroke	F13A1	2162	P00488	coagulation factor XIII A chain	transferase	63	0.602	0.586	2.4995e-07	0.02
Ischemic stroke	SERPINA3	12	P01011	serpin family A member 3	enzyme modulator	92	0.572	0.69	8.0723e-14	0.02
Ischemic stroke	MIR107	406901		microRNA 107		74	0.586	0.621		0.02
Ischemic stroke	REN	5972	P00797	renin	hydrolase; protease	373	0.423	0.759	2.1242e-07	0.02
Ischemic stroke	PCSK9	255738	Q8NBP7	proprotein convertase subtilisin/kexin type 9	hydrolase; protease	101	0.572	0.552	1.8855e-17	0.02
Ischemic stroke	PTGS1	5742	P23219	prostaglandin-endoperoxide synthase 1	oxidoreductase	199	0.495	0.828	2.6476e-06	0.02
Ischemic stroke	UCP2	7351	P55851	uncoupling protein 2		148	0.53	0.69	1.3475e-10	0.02
Ischemic stroke	PSMA6	5687	P60900	proteasome subunit alpha 6	hydrolase; protease	25	0.69	0.379	0.98792	0.02
Ischemic stroke	PRH1	5554	P02810	proline rich protein HaeIII subfamily 1		104	0.543	0.69	0.0044498	0.02
Ischemic stroke	CYP2B6	1555	P20813	cytochrome P450 family 2 subfamily B member 6		306	0.437	0.828	3.4958e-10	0.02
Ischemic stroke	CYP2C9	1559	P11712	cytochrome P450 family 2 subfamily C member 9		129	0.542	0.759	1.8015e-10	0.02
Ischemic stroke	CYP2J2	1573	P51589	cytochrome P450 family 2 subfamily J member 2		45	0.659	0.414	1.8323e-15	0.02
Ischemic stroke	CCL11	6356	P51671	C-C motif chemokine ligand 11	signaling molecule	70	0.586	0.655	0.0098159	0.02
Ischemic stroke	ZFHX3	463	Q15911	zinc finger homeobox 3		51	0.656	0.517	1	0.02
Ischemic stroke	ABCA1	19	O95477	ATP binding cassette subfamily A member 1	transporter	236	0.484	0.793	3.5266e-12	0.02
Ischemic stroke	ACTA2	59	P62736	actin, alpha 2, smooth muscle, aorta	cytoskeletal protein	131	0.54	0.69	0.9299	0.02
Ischemic stroke	SPP1	6696	P10451	secreted phosphoprotein 1		481	0.391	0.862	1.0484e-06	0.02
Ischemic stroke	CDKN2B-AS1	100048912		CDKN2B antisense RNA 1		99	0.55	0.586		0.02
Ischemic stroke	MIR499A	574501		microRNA 499a		81	0.562	0.69		0.02
Ischemic stroke	ABCC8	6833	Q09428	ATP binding cassette subfamily C member 8	transporter	232	0.508	0.69	2.7202e-23	0.02
Ischemic stroke	TGFB1	7040	P01137	transforming growth factor beta 1	signaling molecule	847	0.336	0.931	0.17182	0.02
Ischemic stroke	MIR223	407008		microRNA 223		138	0.512	0.759		0.02
Ischemic stroke	AQP4	361	P55087	aquaporin 4	transporter	132	0.525	0.793	0.002775	0.02
Ischemic stroke	SERPINC1	462	P01008	serpin family C member 1	enzyme modulator	101	0.554	0.621	0.99863	0.02
Ischemic stroke	VKORC1	79001	Q9BQB6	vitamin K epoxide reductase complex subunit 1	oxidoreductase	59	0.639	0.655	0.16296	0.02
Ischemic stroke	CYP11B2	1585	P19099	cytochrome P450 family 11 subfamily B member 2		103	0.572	0.483	9.5436e-19	0.02
Ischemic stroke	F2R	2149	P25116	coagulation factor II thrombin receptor		201	0.478	0.759	0.0057701	0.02
Ischemic stroke	PLA2G7	7941	Q13093	phospholipase A2 group VII	hydrolase	75	0.584	0.552	8.8772e-22	0.02
Ischemic stroke	EPO	2056	P01588	erythropoietin		360	0.425	0.759	0.012147	0.02
Ischemic stroke	P2RY12	64805	Q9H244	purinergic receptor P2Y12	receptor	59	0.642	0.379	0.0018947	0.02
Ischemic stroke	SELPLG	6404	Q14242	selectin P ligand		53	0.621	0.517	0.18618	0.02
Ischemic stroke	SELENOS	55829	Q9BQE4	selenoprotein S		31	0.672	0.448		0.02
Ischemic stroke	CHDH	55349	Q8NE62	choline dehydrogenase	oxidoreductase	62	0.616	0.517	1.3847e-06	0.02
Ischemic stroke	ACE2	59272	Q9BYF1	angiotensin I converting enzyme 2	hydrolase; protease	118	0.542	0.655	0.99813	0.02
Ischemic stroke	ESR2	2100	Q92731	estrogen receptor 2	nucleic acid binding; receptor; transcription factor	297	0.445	0.828	5.3879e-08	0.02
Ischemic stroke	TCN2	6948	P20062	transcobalamin 2		88	0.592	0.517	4.9442e-06	0.01
Ischemic stroke	PDE4DIP	9659	Q5VU43	phosphodiesterase 4D interacting protein		3	0.928	0.103	1.3578e-26	0.01
Ischemic stroke	TNFSF14	8740	O43557	TNF superfamily member 14	signaling molecule	77	0.58	0.586	0.046389	0.01
Ischemic stroke	TRIB1	10221	Q96RU8	tribbles pseudokinase 1	kinase; transferase	34	0.659	0.379	0.8468	0.01
Ischemic stroke	PTGES	9536	O14684	prostaglandin E synthase		101	0.562	0.69	0.65991	0.01
Ischemic stroke	THBD	7056	P07204	thrombomodulin		165	0.505	0.759	0.22912	0.01
Ischemic stroke	TBXAS1	6916	P24557	thromboxane A synthase 1		65	0.663	0.552	2.0696e-20	0.01
Ischemic stroke	XYLB	9942	O75191	xylulokinase	kinase; transferase	1	1	0.069	2.8181e-21	0.01
Ischemic stroke	MADD	8567	Q8WXG6	MAP kinase activating death domain		37	0.659	0.414	1.2008e-14	0.01
Ischemic stroke	EDIL3	10085	O43854	EGF like repeats and discoidin domains 3	cell adhesion molecule; hydrolase; receptor; signaling molecule	49	0.619	0.517	0.00068364	0.01
Ischemic stroke	APOL1	8542	O14791	apolipoprotein L1	transfer/carrier protein; transporter	67	0.59	0.621	5.0756e-06	0.01
Ischemic stroke	NR4A3	8013	Q92570	nuclear receptor subfamily 4 group A member 3	receptor; transcription factor	108	0.545	0.759	0.89536	0.01
Ischemic stroke	STIM1	6786	Q13586	stromal interaction molecule 1		147	0.554	0.655	0.95692	0.01
Ischemic stroke	NAMPT	10135	P43490	nicotinamide phosphoribosyltransferase	signaling molecule	95	0.564	0.69	0.98206	0.01
Ischemic stroke	SULT1E1	6783	P49888	sulfotransferase family 1E member 1		105	0.538	0.759	2.1682e-07	0.01
Ischemic stroke	TNFSF12	8742	O43508	TNF superfamily member 12		76	0.598	0.655	0.75747	0.01
Ischemic stroke	IL18RAP	8807	O95256	interleukin 18 receptor accessory protein	receptor	22	0.72	0.517	0.0019924	0.01
Ischemic stroke	CARTPT	9607	Q16568	CART prepropeptide		60	0.633	0.448	0.10586	0.01
Ischemic stroke	TNFSF4	7292	P23510	TNF superfamily member 4	signaling molecule	76	0.582	0.69	0.049483	0.01
Ischemic stroke	XRCC1	7515	P18887	X-ray repair cross complementing 1		264	0.449	0.828	4.7623e-09	0.01
Ischemic stroke	PLA2G6	8398	O60733	phospholipase A2 group VI	enzyme modulator	260	0.494	0.724	2.7949e-10	0.01
Ischemic stroke	VCAM1	7412	P19320	vascular cell adhesion molecule 1		232	0.466	0.793	0.74466	0.01
Ischemic stroke	SLC33A1	9197	O00400	solute carrier family 33 member 1	transporter	117	0.551	0.655	9.1436e-05	0.01
Ischemic stroke	MSC	9242	O60682	musculin		123	0.526	0.655	0.022585	0.01
Ischemic stroke	PPIG	9360	Q13427	peptidylprolyl isomerase G		114	0.537	0.793	0.9649	0.01
Ischemic stroke	ADIPOQ	9370	Q15848	adiponectin, C1Q and collagen domain containing		201	0.485	0.724	5.0074e-09	0.01
Ischemic stroke	TRAF6	7189	Q9Y4K3	TNF receptor associated factor 6	signaling molecule	120	0.528	0.724	0.9971	0.01
Ischemic stroke	TP53	7157	P04637	tumor protein p53	transcription factor	1773	0.251	0.897	0.16862	0.01
Ischemic stroke	HOMER2	9455	Q9NSB8	homer scaffold protein 2	signaling molecule	12	0.773	0.276	0.0093153	0.01
Ischemic stroke	ABCG2	9429	Q9UNQ0	ATP binding cassette subfamily G member 2 (Junior blood group)	transporter	265	0.449	0.793	1.2599e-32	0.01
Ischemic stroke	KALRN	8997	O60229	kalirin RhoGEF kinase	signaling molecule	23	0.72	0.207	1	0.01
Ischemic stroke	TIMP2	7077	P16035	TIMP metallopeptidase inhibitor 2	enzyme modulator	224	0.467	0.759	0.80818	0.01
Ischemic stroke	TLR3	7098	O15455	toll like receptor 3	extracellular matrix protein; receptor	220	0.475	0.862	1.516e-07	0.01
Ischemic stroke	GDF15	9518	Q99988	growth differentiation factor 15	signaling molecule	174	0.496	0.621	2.851e-07	0.01
Ischemic stroke	LPAR2	9170	Q9HBW0	lysophosphatidic acid receptor 2	receptor	120	0.537	0.69	0.04354	0.01
Ischemic stroke	HOMER1	9456	Q86YM7	homer scaffold protein 1	signaling molecule	53	0.69	0.241	0.99937	0.01
Ischemic stroke	TFPI2	7980	P48307	tissue factor pathway inhibitor 2	enzyme modulator	110	0.545	0.621	0.00078009	0.01
Ischemic stroke	WRN	7486	Q14191	Werner syndrome RecQ like helicase	nucleic acid binding	138	0.545	0.586	3.0975e-33	0.01
Ischemic stroke	KLF2	10365	Q9Y5W3	Kruppel like factor 2	nucleic acid binding; transcription factor	63	0.602	0.586	0.56497	0.01
Ischemic stroke	PGR-AS1	101054525		PGR antisense RNA 1		86	0.57	0.586		0.01
Ischemic stroke	ACOT4	122970	Q8N9L9	acyl-CoA thioesterase 4		2	1	0.069	1.0593e-08	0.01
Ischemic stroke	HSPA12B	116835	Q96MM6	heat shock protein family A (Hsp70) member 12B		11	0.773	0.241	0.00030746	0.01
Ischemic stroke	METTL18	92342	O95568	methyltransferase like 18		1	1	0.069	2.9533e-05	0.01
Ischemic stroke	KCNK17	89822	Q96T54	potassium two pore domain channel subfamily K member 17		3	0.886	0.172	2.9342e-06	0.01
Ischemic stroke	ORAI1	84876	Q96D31	ORAI calcium release-activated calcium modulator 1		123	0.565	0.655	1.6594e-05	0.01
Ischemic stroke	KDM2B	84678	Q8NHM5	lysine demethylase 2B		26	0.713	0.414	1	0.01
Ischemic stroke	IL1F10	84639	Q8WWZ1	interleukin 1 family member 10		8	0.815	0.276	2.0421e-06	0.01
Ischemic stroke	RNF146	81847	Q9NTX7	ring finger protein 146		14	0.735	0.276	0.84761	0.01
Ischemic stroke	FLAD1	80308	Q8NFF5	flavin adenine dinucleotide synthetase 1		38	0.713	0.414	0.0061704	0.01
Ischemic stroke	ZC3H12A	80149	Q5D1E8	zinc finger CCCH-type containing 12A	nucleic acid binding	51	0.636	0.552	0.14187	0.01
Ischemic stroke	DHX40	79665	Q8IX18	DEAH-box helicase 40	nucleic acid binding	23	0.727	0.379	0.74591	0.01
Ischemic stroke	NEIL1	79661	Q96FI4	nei like DNA glycosylase 1		47	0.636	0.586	5.0734e-07	0.01
Ischemic stroke	ACD	65057	Q96AP0	ACD, shelterin complex subunit and telomerase recruitment factor		79	0.624	0.69	3.7759e-13	0.01
Ischemic stroke	PINK1	65018	Q9BXM7	PTEN induced putative kinase 1	kinase; receptor; transferase	96	0.577	0.586	1.034e-10	0.01
Ischemic stroke	AGXT2	64902	Q9BYV1	alanine--glyoxylate aminotransferase 2		13	0.785	0.345	7.2474e-27	0.01
Ischemic stroke	SMURF2	64750	Q9HAU4	SMAD specific E3 ubiquitin protein ligase 2	ligase	32	0.672	0.448	0.8812	0.01
Ischemic stroke	IL21	59067	Q9HBE4	interleukin 21		153	0.504	0.759	0.64196	0.01
Ischemic stroke	UBR3	130507	Q6ZT12	ubiquitin protein ligase E3 component n-recognin 3 (putative)		4	0.857	0.103	1	0.01
Ischemic stroke	DEFB104A	140596	Q8WTQ1	defensin beta 104A		24	0.69	0.483	0.096852	0.01
Ischemic stroke	TTC7B	145567	Q86TV6	tetratricopeptide repeat domain 7B		3	1	0.069	1	0.01
Ischemic stroke	PTCSC3	100886964		papillary thyroid carcinoma susceptibility candidate 3		7	0.834	0.138		0.01
Ischemic stroke	DEFB4B	100289462	O15263	defensin beta 4B	defense/immunity protein	91	0.558	0.724	0.068922	0.01
Ischemic stroke	MIR497	574456		microRNA 497		68	0.58	0.586		0.01
Ischemic stroke	DEFB104B	503618	Q8WTQ1	defensin beta 104B		23	0.69	0.483	0.33623	0.01
Ischemic stroke	MIR424	494336		microRNA 424		66	0.6	0.552		0.01
Ischemic stroke	MIAT	440823		myocardial infarction associated transcript		11	0.799	0.207		0.01
Ischemic stroke	TNFSF12-TNFSF13	407977	O43508	TNFSF12-TNFSF13 readthrough		40	0.639	0.517	0.75747	0.01
Ischemic stroke	MIR29B2	407025		microRNA 29b-2		95	0.554	0.724		0.01
Ischemic stroke	MIR29B1	407024		microRNA 29b-1		92	0.558	0.69		0.01
Ischemic stroke	MIR21	406991		microRNA 21		400	0.407	0.759		0.01
Ischemic stroke	LOC107984148	107984148		beta-defensin 104A		23	0.69	0.483		0.01
Ischemic stroke	MIR143	406935		microRNA 143		120	0.536	0.621		0.01
Ischemic stroke	MIR132	406921		microRNA 132		94	0.569	0.759		0.01
Ischemic stroke	SERPINA9	327657	Q86WD7	serpin family A member 9	enzyme modulator	9	0.815	0.207	8.4556e-13	0.01
Ischemic stroke	NPAS4	266743	Q8IUM7	neuronal PAS domain protein 4	nucleic acid binding; transcription factor	9	0.815	0.138	0.96647	0.01
Ischemic stroke	ARL6IP6	151188	Q8N6S5	ADP ribosylation factor like GTPase 6 interacting protein 6		7	0.857	0.172	0.019222	0.01
Ischemic stroke	CILP2	148113	Q8IUL8	cartilage intermediate layer protein 2		3	0.886	0.172	4.3548e-07	0.01
Ischemic stroke	SEMA6A	57556	Q9H2E6	semaphorin 6A	signaling molecule	219	0.468	0.793	0.99993	0.01
Ischemic stroke	ACKR3	57007	P25106	atypical chemokine receptor 3		181	0.494	0.759	0.37575	0.01
Ischemic stroke	MEPE	56955	Q9NQ76	matrix extracellular phosphoglycoprotein		30	0.672	0.483	0.0097329	0.01
Ischemic stroke	MMD	23531	Q15546	monocyte to macrophage differentiation associated	receptor	23	0.735	0.414	0.00076446	0.01
Ischemic stroke	SPIDR	23514	Q14159	scaffold protein involved in DNA repair		28	0.713	0.448	3.175e-17	0.01
Ischemic stroke	CRTC1	23373	Q6UUV9	CREB regulated transcription coactivator 1	transcription factor	65	0.602	0.621	0.42733	0.01
Ischemic stroke	RCOR1	23186	Q9UKL0	REST corepressor 1		19	0.762	0.414	0.99993	0.01
Ischemic stroke	TBC1D9	23158	Q6ZT07	TBC1 domain family member 9	enzyme modulator; hydrolase; protease	296	0.434	0.828	2.8265e-05	0.01
Ischemic stroke	CARD8	22900	Q9Y2G2	caspase recruitment domain family member 8		39	0.645	0.552	1.727e-06	0.01
Ischemic stroke	CAPN10	11132	Q9HC96	calpain 10	calcium-binding protein; hydrolase; protease	46	0.63	0.483	2.1897e-12	0.01
Ischemic stroke	ADAMTS13	11093	Q76LX8	ADAM metallopeptidase with thrombospondin type 1 motif 13	enzyme modulator; extracellular matrix protein; hydrolase; protease	136	0.536	0.69	5.1158e-15	0.01
Ischemic stroke	ALDH1L1	10840	O75891	aldehyde dehydrogenase 1 family member L1	oxidoreductase	22	0.72	0.414	4.7916e-11	0.01
Ischemic stroke	SLC17A3	10786	O00476	solute carrier family 17 member 3	transporter	11	0.834	0.241	8.4514e-21	0.01
Ischemic stroke	PLK2	10769	Q9NYY3	polo like kinase 2		54	0.621	0.586	0.9999	0.01
Ischemic stroke	MASP2	10747	O00187	mannan binding lectin serine peptidase 2	hydrolase; protease	42	0.642	0.655	3.5872e-14	0.01
Ischemic stroke	CXCR6	10663	O00574	C-X-C motif chemokine receptor 6		133	0.525	0.793	5.3305e-05	0.01
Ischemic stroke	CAMKK2	10645	Q96RR4	calcium/calmodulin dependent protein kinase kinase 2		37	0.659	0.517	0.076307	0.01
Ischemic stroke	SORBS1	10580	Q9BX66	sorbin and SH3 domain containing 1		51	0.619	0.724	1.3329e-12	0.01
Ischemic stroke	GNLY	10578	P22749	granulysin		32	0.672	0.552	7.9328e-09	0.01
Ischemic stroke	PROCR	10544	Q9UNN8	protein C receptor	enzyme modulator; receptor	66	0.598	0.552	0.0056892	0.01
Ischemic stroke	PADI4	23569	Q9UM07	peptidyl arginine deiminase 4		76	0.592	0.586	2.5932e-16	0.01
Ischemic stroke	IL17B	27190	Q9UHF5	interleukin 17B		57	0.607	0.655	0.034268	0.01
Ischemic stroke	ANGPTL3	27329	Q9Y5C1	angiopoietin like 3	signaling molecule	32	0.659	0.276	7.0934e-14	0.01
Ischemic stroke	RNLS	55328	Q5VYX0	renalase, FAD dependent amine oxidase		21	0.701	0.379	4.4412e-06	0.01
Ischemic stroke	RASIP1	54922	Q5U651	Ras interacting protein 1		9	0.834	0.207	0.99805	0.01
Ischemic stroke	TRPM7	54822	Q96QT4	transient receptor potential cation channel subfamily M member 7	receptor; transporter	84	0.584	0.552	1.7222e-15	0.01
Ischemic stroke	TRPM4	54795	Q8TD43	transient receptor potential cation channel subfamily M member 4	receptor; transporter	34	0.69	0.379	5.9176e-33	0.01
Ischemic stroke	ROPN1	54763	Q9HAT0	rhophilin associated tail protein 1		2	1	0.069	0.00072085	0.01
Ischemic stroke	UGT1A1	54658	P22309	UDP glucuronosyltransferase family 1 member A1		195	0.491	0.724	3.5614e-06	0.01
Ischemic stroke	TREM2	54209	Q9NZC2	triggering receptor expressed on myeloid cells 2		178	0.572	0.552	4.0014e-09	0.01
Ischemic stroke	DUOX1	53905	Q9NRD9	dual oxidase 1	oxidoreductase	38	0.656	0.517	1.5802e-30	0.01
Ischemic stroke	ASIC5	51802	Q9NY37	acid sensing ion channel subunit family member 5	transporter	8	0.799	0.345	6.7451e-13	0.01
Ischemic stroke	TLR8	51311	Q9NR97	toll like receptor 8		62	0.611	0.655	0.30926	0.01
Ischemic stroke	TLR7	51284	Q9NYK1	toll like receptor 7		114	0.542	0.759	0.97165	0.01
Ischemic stroke	MLXIPL	51085	Q9NP71	MLX interacting protein like		146	0.577	0.655	0.049448	0.01
Ischemic stroke	PDE11A	50940	Q9HCR9	phosphodiesterase 11A		71	0.627	0.517	1.5681e-34	0.01
Ischemic stroke	IRX4	50805	P78413	iroquois homeobox 4	nucleic acid binding; transcription factor	13	0.785	0.172	0.059782	0.01
Ischemic stroke	IL20	50604	Q9NYY1	interleukin 20		75	0.575	0.69	1.7231e-06	0.01
Ischemic stroke	DUOX2	50506	Q9NRD8	dual oxidase 2	oxidoreductase	82	0.598	0.69	2.6436e-56	0.01
Ischemic stroke	REM1	28954	O75628	RRAD and GEM like GTPase 1		64	0.621	0.655	6.765e-08	0.01
Ischemic stroke	IRF9	10379	Q00978	interferon regulatory factor 9	nucleic acid binding; transcription factor	35	0.656	0.552	0.5924	0.01
Ischemic stroke	SSTR4	6754	P31391	somatostatin receptor 4	receptor	103	0.558	0.69	2.7722e-13	0.01
Ischemic stroke	NRG1	3084	Q02297	neuregulin 1	signaling molecule	173	0.506	0.759	0.99553	0.01
Ischemic stroke	F8	2157	P00451	coagulation factor VIII	cell adhesion molecule; hydrolase; receptor; signaling molecule	82	0.586	0.655	1	0.01
Ischemic stroke	EZH2	2146	Q15910	enhancer of zeste 2 polycomb repressive complex 2 subunit		425	0.421	0.759	1	0.01
Ischemic stroke	EPHB2	2048	P29323	EPH receptor B2		331	0.425	0.759	0.99999	0.01
Ischemic stroke	EGR1	1958	P18146	early growth response 1	nucleic acid binding; transcription factor	254	0.459	0.793	0.3269	0.01
Ischemic stroke	EEF1A2	1917	Q05639	eukaryotic translation elongation factor 1 alpha 2	enzyme modulator; hydrolase; nucleic acid binding	181	0.51	0.69	0.99606	0.01
Ischemic stroke	EDNRB	1910	P24530	endothelin receptor type B		223	0.492	0.793	0.012005	0.01
Ischemic stroke	EDNRA	1909	P25101	endothelin receptor type A		259	0.469	0.828	0.99154	0.01
Ischemic stroke	DVL1	1855	O14640	dishevelled segment polarity protein 1	enzyme modulator; signaling molecule	151	0.582	0.655	1.8233e-05	0.01
Ischemic stroke	NQO1	1728	P15559	NAD(P)H quinone dehydrogenase 1		230	0.467	0.724	1.024e-09	0.01
Ischemic stroke	DEFB4A	1673	O15263	defensin beta 4A	defense/immunity protein	101	0.551	0.724	0.0012421	0.01
Ischemic stroke	DEFB1	1672	P60022	defensin beta 1		96	0.555	0.655	0.36822	0.01
Ischemic stroke	CYP4A11	1579	Q02928	cytochrome P450 family 4 subfamily A member 11	oxidoreductase	20	0.72	0.31	5.5837e-25	0.01
Ischemic stroke	CYP2C8	1558	P10632	cytochrome P450 family 2 subfamily C member 8		50	0.639	0.517	1.79e-22	0.01
Ischemic stroke	CYP2B7P	1556		cytochrome P450 family 2 subfamily B member 7, pseudogene		4	0.857	0.172		0.01
Ischemic stroke	CYBA	1535	P13498	cytochrome b-245 alpha chain		128	0.55	0.655	1.08e-05	0.01
Ischemic stroke	CSF3	1440	P09919	colony stimulating factor 3		393	0.421	0.828	0.32663	0.01
Ischemic stroke	F11	2160	P03951	coagulation factor XI	hydrolase; protease	45	0.656	0.414	5.0894e-26	0.01
Ischemic stroke	F12	2161	P00748	coagulation factor XII	hydrolase; protease	40	0.727	0.379	2.1487e-07	0.01
Ischemic stroke	GRM2	2912	Q14416	glutamate metabotropic receptor 2	receptor	47	0.645	0.414	0.1063	0.01
Ischemic stroke	GRIN1	2902	Q05586	glutamate ionotropic receptor NMDA type subunit 1		73	0.63	0.448	0.98871	0.01
Ischemic stroke	GRIK2	2898	Q13002	glutamate ionotropic receptor kainate type subunit 2		62	0.621	0.586	0.99979	0.01
Ischemic stroke	GPX3	2878	P22352	glutathione peroxidase 3	oxidoreductase	84	0.575	0.586	0.042528	0.01
Ischemic stroke	GPR42	2866	O15529	G protein-coupled receptor 42 (gene/pseudogene)		87	0.577	0.69	0.047652	0.01
Ischemic stroke	GNB3	2784	P16520	G protein subunit beta 3	enzyme modulator; hydrolase	139	0.533	0.724	2.9246e-11	0.01
Ischemic stroke	GJA4	2701	P35212	gap junction protein alpha 4	cell junction protein	23	0.701	0.276	0.044987	0.01
Ischemic stroke	GCH1	2643	P30793	GTP cyclohydrolase 1	hydrolase	193	0.534	0.724	0.91089	0.01
Ischemic stroke	GAMT	2593	Q14353	guanidinoacetate N-methyltransferase		56	0.667	0.241	0.010013	0.01
Ischemic stroke	GALNT2	2590	Q10471	polypeptide N-acetylgalactosaminyltransferase 2	transferase	26	0.713	0.345	0.0074651	0.01
Ischemic stroke	G6PD	2539	P11413	glucose-6-phosphate dehydrogenase	oxidoreductase	225	0.476	0.724	0.94422	0.01
Ischemic stroke	FOLH1	2346	Q04609	folate hydrolase 1	hydrolase; protease	75	0.584	0.724	2.2741e-08	0.01
Ischemic stroke	FLG	2312	P20930	filaggrin		107	0.55	0.655	0.00031234	0.01
Ischemic stroke	FGF13	2258	Q92913	fibroblast growth factor 13	signaling molecule	122	0.532	0.621	0.90603	0.01
Ischemic stroke	FGF2	2247	P09038	fibroblast growth factor 2	signaling molecule	437	0.404	0.897	0.019149	0.01
Ischemic stroke	FABP4	2167	P15090	fatty acid binding protein 4		71	0.59	0.552	3.6451e-05	0.01
Ischemic stroke	CRYZ	1429	Q08257	crystallin zeta		92	0.554	0.621	6.0743e-23	0.01
Ischemic stroke	COX8A	1351	P10176	cytochrome c oxidase subunit 8A	oxidoreductase	241	0.461	0.793	0.10544	0.01
Ischemic stroke	COMT	1312	P21964	catechol-O-methyltransferase	transferase	427	0.426	0.897	1.2669e-05	0.01
Ischemic stroke	ATM	472	Q13315	ATM serine/threonine kinase	kinase; nucleic acid binding; transferase	486	0.401	0.862	5.9771e-46	0.01
Ischemic stroke	AR	367	P10275	androgen receptor	nucleic acid binding; receptor; transcription factor	564	0.38	0.793	0.98299	0.01
Ischemic stroke	APOH	350	P02749	apolipoprotein H		63	0.611	0.724	1.2165e-13	0.01
Ischemic stroke	APOA1	335	P02647	apolipoprotein A1		255	0.463	0.759	0.00054889	0.01
Ischemic stroke	BIRC5	332	O15392	baculoviral IAP repeat containing 5	enzyme modulator	191	0.479	0.655	0.056738	0.01
Ischemic stroke	ANGPT2	285	O15123	angiopoietin 2	signaling molecule	211	0.479	0.724	0.85572	0.01
Ischemic stroke	ANGPT1	284	Q15389	angiopoietin 1	signaling molecule	184	0.495	0.69	0.99071	0.01
Ischemic stroke	ALOX12	239	P18054	arachidonate 12-lipoxygenase, 12S type	oxidoreductase	76	0.596	0.621	6.6067e-16	0.01
Ischemic stroke	AHSG	197	P02765	alpha 2-HS glycoprotein	enzyme modulator	107	0.577	0.69	2.7212e-10	0.01
Ischemic stroke	APLNR	187	P35414	apelin receptor	receptor	41	0.652	0.345	0.75834	0.01
Ischemic stroke	ADRB2	154	P07550	adrenoceptor beta 2	receptor	254	0.479	0.793	0.58042	0.01
Ischemic stroke	ADRA2B	151	P18089	adrenoceptor alpha 2B	receptor	132	0.545	0.69	2.2049e-06	0.01
Ischemic stroke	ADRA1A	148	P35348	adrenoceptor alpha 1A	receptor	111	0.548	0.69	2.6009e-07	0.01
Ischemic stroke	ADM	133	P35318	adrenomedullin	signaling molecule	246	0.471	0.724	0.034615	0.01
Ischemic stroke	ADD1	118	P35611	adducin 1	cytoskeletal protein	56	0.607	0.517	0.99071	0.01
Ischemic stroke	ABO	28	P16442	ABO, alpha 1-3-N-acetylgalactosaminyltransferase and alpha 1-3-galactosyltransferase	transferase	193	0.491	0.828		0.01
Ischemic stroke	AVP	551	P01185	arginine vasopressin	signaling molecule	238	0.486	0.759	0.075195	0.01
Ischemic stroke	BARD1	580	Q99728	BRCA1 associated RING domain 1		54	0.624	0.379	2.1821e-24	0.01
Ischemic stroke	COL4A2	1284	P08572	collagen type IV alpha 2 chain		59	0.642	0.448	1.0424e-13	0.01
Ischemic stroke	CIRBP	1153	Q14011	cold inducible RNA binding protein	nucleic acid binding	30	0.663	0.448	0.29181	0.01
Ischemic stroke	CHIT1	1118	Q13231	chitinase 1		71	0.58	0.621	8.4475e-16	0.01
Ischemic stroke	CHI3L1	1116	P36222	chitinase 3 like 1		167	0.502	0.793	8.5062e-06	0.01
Ischemic stroke	CDKN3	1033	Q16667	cyclin dependent kinase inhibitor 3		130	0.518	0.724	0.0021365	0.01
Ischemic stroke	CDK5	1020	Q00535	cyclin dependent kinase 5	kinase; transferase	130	0.542	0.69	0.095196	0.01
Ischemic stroke	CD40LG	959	P29965	CD40 ligand	signaling molecule	291	0.447	0.828	0.72669	0.01
Ischemic stroke	CD40	958	P25942	CD40 molecule		323	0.433	0.862	0.85939	0.01
Ischemic stroke	CAD	790	P27708	carbamoyl-phosphate synthetase 2, aspartate transcarbamylase, and dihydroorotase	hydrolase; ligase; protease; transferase	109	0.557	0.655	0.99998	0.01
Ischemic stroke	VPS51	738	Q9UID3	VPS51, GARP complex subunit		116	0.543	0.655	9.6864e-09	0.01
Ischemic stroke	BTF3P11	690		basic transcription factor 3 pseudogene 11		62	0.602	0.552		0.01
Ischemic stroke	BRS3	680	P32247	bombesin receptor subtype 3		94	0.569	0.69	0.90963	0.01
Ischemic stroke	BRCA2	675	P51587	BRCA2, DNA repair associated	nucleic acid binding	358	0.426	0.793	5.4597e-24	0.01
Ischemic stroke	BHMT	635	Q93088	betaine--homocysteine S-methyltransferase		50	0.616	0.483	2.7043e-13	0.01
Ischemic stroke	CEACAM1	634	P13688	carcinoembryonic antigen related cell adhesion molecule 1		82	0.59	0.552	0.00056749	0.01
Ischemic stroke	BCL2A1	597	Q16548	BCL2 related protein A1	signaling molecule	75	0.582	0.621	0.20716	0.01
Ischemic stroke	A2M	2	P01023	alpha-2-macroglobulin	defense/immunity protein; enzyme modulator; signaling molecule	86	0.564	0.724	5.608e-11	0.01
Ischemic stroke	HMGB1	3146	P09429	high mobility group box 1	nucleic acid binding; signaling molecule; transcription factor	322	0.433	0.828	0.83018	0.01
Ischemic stroke	SRF	6722	P11831	serum response factor	transcription factor	75	0.598	0.69	0.97512	0.01
Ischemic stroke	PLA2G2A	5320	P14555	phospholipase A2 group IIA	hydrolase	148	0.509	0.69	0.10723	0.01
Ischemic stroke	PLA2G1B	5319	P04054	phospholipase A2 group IB	hydrolase	157	0.502	0.793	1.0899e-10	0.01
Ischemic stroke	PITX2	5308	Q99697	paired like homeodomain 2		197	0.51	0.724	0.97909	0.01
Ischemic stroke	PIN1	5300	Q13526	peptidylprolyl cis/trans isomerase, NIMA-interacting 1		119	0.536	0.655	0.76129	0.01
Ischemic stroke	SERPINI1	5274	Q99574	serpin family I member 1	enzyme modulator	49	0.642	0.31	0.029902	0.01
Ischemic stroke	SERPINE2	5270	P07093	serpin family E member 2	enzyme modulator	46	0.639	0.517	0.76421	0.01
Ischemic stroke	ABCB1	5243	P08183	ATP binding cassette subfamily B member 1	hydrolase; protease	606	0.371	0.828	1.3094e-05	0.01
Ischemic stroke	PECAM1	5175	P16284	platelet and endothelial cell adhesion molecule 1	cell adhesion molecule	184	0.492	0.69		0.01
Ischemic stroke	PDGFA	5154	P04085	platelet derived growth factor subunit A	signaling molecule	115	0.542	0.621	0.80731	0.01
Ischemic stroke	PC	5091	P11498	pyruvate carboxylase	ligase	98	0.565	0.724	0.0071752	0.01
Ischemic stroke	KCNA3	3738	P22001	potassium voltage-gated channel subfamily A member 3		201	0.481	0.724	0.86034	0.01
Ischemic stroke	P2RY1	5028	P47900	purinergic receptor P2Y1		49	0.642	0.586	0.54087	0.01
Ischemic stroke	P2RX7	5027	Q99572	purinergic receptor P2X 7	receptor; transporter	165	0.503	0.759	3.0454e-11	0.01
Ischemic stroke	OGG1	4968	O15527	8-oxoguanine DNA glycosylase		218	0.476	0.759	2.1379e-12	0.01
Ischemic stroke	NTF3	4908	P20783	neurotrophin 3	signaling molecule	132	0.525	0.621	0.88635	0.01
Ischemic stroke	NPR3	4883	P17342	natriuretic peptide receptor 3		31	0.727	0.414	1.1318e-05	0.01
Ischemic stroke	PLAU	5328	P00749	plasminogen activator, urokinase	hydrolase; protease	325	0.434	0.69	2.1424e-06	0.01
Ischemic stroke	PLIN1	5346	O60240	perilipin 1		45	0.656	0.379	2.0397e-09	0.01
Ischemic stroke	SLC19A1	6573	P41440	solute carrier family 19 member 1	transporter	98	0.552	0.621	5.2001e-06	0.01
Ischemic stroke	SLC1A2	6506	P43004	solute carrier family 1 member 2	transporter	92	0.572	0.517	0.61687	0.01
Ischemic stroke	SHMT1	6470	P34896	serine hydroxymethyltransferase 1	transferase	60	0.607	0.517	8.6462e-14	0.01
Ischemic stroke	SHC1	6464	P29353	SHC adaptor protein 1	signaling molecule	42	0.659	0.414	0.0017906	0.01
Ischemic stroke	SGK1	6446	O00141	serum/glucocorticoid regulated kinase 1	calcium-binding protein; kinase; transfer/carrier protein; transferase	128	0.53	0.621	0.040926	0.01
Ischemic stroke	CCL22	6367	O00626	C-C motif chemokine ligand 22	signaling molecule	86	0.564	0.69	0.007616	0.01
Ischemic stroke	SAA1	6288	P0DJI8	serum amyloid A1	defense/immunity protein; transfer/carrier protein; transporter	82	0.602	0.655	0.014396	0.01
Ischemic stroke	SAA@	6287		serum amyloid A1 cluster		33	0.672	0.552		0.01
Ischemic stroke	REST	5978	Q13127	RE1 silencing transcription factor	transcription factor	100	0.584	0.517	0.99393	0.01
Ischemic stroke	RAPSN	5913	Q13702	receptor associated protein of the synapse		104	0.614	0.586	0.0015787	0.01
Ischemic stroke	MOK	5891	Q9UQ07	MOK protein kinase	kinase; transferase	104	0.554	0.655	9.9196e-22	0.01
Ischemic stroke	PTPRG	5793	P23470	protein tyrosine phosphatase, receptor type G	hydrolase; phosphatase; receptor	43	0.639	0.69	2.1982e-05	0.01
Ischemic stroke	PTGIS	5740	Q16647	prostaglandin I2 synthase		54	0.624	0.552	1.4329e-09	0.01
Ischemic stroke	PTGER2	5732	P43116	prostaglandin E receptor 2	receptor	64	0.607	0.621	0.041771	0.01
Ischemic stroke	PRNP	5621	F7VJQ1;P04156	prion protein		310	0.474	0.897	0.00071528	0.01
Ischemic stroke	MAPK1	5594	P28482	mitogen-activated protein kinase 1	kinase; transferase	525	0.387	0.862	0.9973	0.01
Ischemic stroke	NPPB	4879	P16860	natriuretic peptide B		112	0.567	0.552	9.1339e-06	0.01
Ischemic stroke	NOTCH1	4851	P46531	notch 1		389	0.415	0.759	1	0.01
Ischemic stroke	NDUFC2	4718	O95298	NADH:ubiquinone oxidoreductase subunit C2	oxidoreductase	4	0.928	0.138	0.68877	0.01
Ischemic stroke	LGALS2	3957	P05162	galectin 2	cell adhesion molecule; signaling molecule	17	0.727	0.31	0.019387	0.01
Ischemic stroke	KDR	3791	P35968	kinase insert domain receptor		343	0.423	0.724	0.99979	0.01
Ischemic stroke	KCNQ1	3784	P51787	potassium voltage-gated channel subfamily Q member 1		180	0.525	0.586	2.0728e-07	0.01
Ischemic stroke	KCNJ13	3769	O60928	potassium voltage-gated channel subfamily J member 13		37	0.681	0.172	0.011166	0.01
Ischemic stroke	ITGA2B	3674	P08514	integrin subunit alpha 2b		108	0.548	0.517	1.3452e-15	0.01
Ischemic stroke	IRF4	3662	Q15306	interferon regulatory factor 4	nucleic acid binding; transcription factor	113	0.547	0.517	0.88028	0.01
Ischemic stroke	IMPA2	3613	O14732	inositol monophosphatase 2	hydrolase; phosphatase	21	0.696	0.276	0.001106	0.01
Ischemic stroke	IL18	3606	Q14116	interleukin 18		437	0.404	0.862	0.029184	0.01
Ischemic stroke	IL16	3603	Q14005	interleukin 16	signaling molecule	112	0.543	0.793	9.4106e-11	0.01
Ischemic stroke	IL9	3578	P15248	interleukin 9		122	0.53	0.69	9.6189e-07	0.01
Ischemic stroke	IL5RA	3568	Q01344	interleukin 5 receptor subunit alpha	defense/immunity protein; signaling molecule	27	0.69	0.552	2.0804e-08	0.01
Ischemic stroke	IL4	3565	P05112	interleukin 4		615	0.364	0.931	0.0052963	0.01
Ischemic stroke	IGF1R	3480	P08069	insulin like growth factor 1 receptor		373	0.433	0.828	0.98751	0.01
Ischemic stroke	ICAM1	3383	P05362	intercellular adhesion molecule 1		489	0.386	0.897	0.038102	0.01
Ischemic stroke	HSPA4	3308	P34932	heat shock protein family A (Hsp70) member 4		292	0.441	0.793	0.9999	0.01
Ischemic stroke	HSPA1B	3304	P0DMV8;P0DMV9	heat shock protein family A (Hsp70) member 1B		143	0.514	0.793	0.0050913	0.01
Ischemic stroke	LIF	3976	P15018	LIF, interleukin 6 family cytokine	signaling molecule	138	0.528	0.655	0.50007	0.01
Ischemic stroke	FADS1	3992	O60427	fatty acid desaturase 1		72	0.636	0.621	0.41321	0.01
Ischemic stroke	MUT	4594	P22033	methylmalonyl-CoA mutase	isomerase	88	0.616	0.655	3.2478e-21	0.01
Ischemic stroke	MUSK	4593	O15146	muscle associated receptor tyrosine kinase		104	0.609	0.621	1.1708e-07	0.01
Ischemic stroke	MTRR	4552	Q9UBK8	5-methyltetrahydrofolate-homocysteine methyltransferase reductase		167	0.51	0.655	1.7688e-14	0.01
Ischemic stroke	MTR	4548	Q99707	5-methyltetrahydrofolate-homocysteine methyltransferase		196	0.493	0.724	2.6452e-10	0.01
Ischemic stroke	COX2	4513	P00403	cytochrome c oxidase subunit II	oxidoreductase	494	0.397	0.862		0.01
Ischemic stroke	MPO	4353	P05164	myeloperoxidase	oxidoreductase	327	0.435	0.931	6.8206e-15	0.01
Ischemic stroke	MMP12	4321	P39900	matrix metallopeptidase 12	hydrolase; protease	134	0.516	0.862		0.01
Ischemic stroke	MMP10	4319	P09238	matrix metallopeptidase 10	hydrolase; protease	84	0.58	0.759	5.5281e-15	0.01
Ischemic stroke	MMP7	4316	P09237	matrix metallopeptidase 7	hydrolase; protease	218	0.47	0.724	1.0654e-09	0.01
Ischemic stroke	MMP2	4313	P08253	matrix metallopeptidase 2	hydrolase; protease	628	0.373	0.862	0.83952	0.01
Ischemic stroke	NR3C2	4306	P08235	nuclear receptor subfamily 3 group C member 2	nucleic acid binding; receptor; transcription factor	163	0.52	0.69	0.80843	0.01
Ischemic stroke	MIP	4284	P30301	major intrinsic protein of lens fiber	transporter	113	0.54	0.759	0.029428	0.01
Ischemic stroke	CIITA	4261	P33076	class II major histocompatibility complex transactivator		105	0.564	0.724	1.0194e-07	0.01
Ischemic stroke	ADAM11	4185	O75078	ADAM metallopeptidase domain 11	hydrolase; protease	21	0.713	0.414	9.8082e-06	0.01
Ischemic stroke	LRP6	4040	O75581	LDL receptor related protein 6		83	0.588	0.724	0.98369	0.01
Ischemic stroke	LRP1	4035	Q07954	LDL receptor related protein 1		128	0.533	0.724	1	0.01
Ischemic stroke	HSPA1A	3303	P0DMV8;P0DMV9	heat shock protein family A (Hsp70) member 1A		141	0.516	0.793	0.029335	0.01
Cerebral Infarction	VDR	7421	P11473	vitamin D receptor	nucleic acid binding; receptor; transcription factor	533	0.39	0.793	6.3488e-05	0.31
Cerebral Infarction	ADH1B	125	P00325	alcohol dehydrogenase 1B (class I), beta polypeptide	oxidoreductase	152	0.525	0.759	1.0876e-06	0.31
Cerebral Infarction	HBA1	3039	P69905	hemoglobin subunit alpha 1		183	0.508	0.759	0.0063423	0.3
Cerebral Infarction	MAP3K5	4217	Q99683	mitogen-activated protein kinase kinase kinase 5		95	0.551	0.621	0.54174	0.21
Cerebral Infarction	MAP2	4133	P11137	microtubule associated protein 2		66	0.598	0.483	1	0.2
Cerebral Infarction	SLC6A1	6529	P30531	solute carrier family 6 member 1	transporter	84	0.607	0.31	0.9999	0.2
Cerebral Infarction	VIM	7431	P08670	vimentin		322	0.432	0.793	0.78494	0.2
Cerebral Infarction	ADORA1	134	P30542	adenosine A1 receptor	receptor	67	0.616	0.552	0.017459	0.2
Cerebral Infarction	PTGDR	5729	Q13258	prostaglandin D2 receptor	receptor	26	0.713	0.414	4.4581e-06	0.2
Cerebral Infarction	ANXA1	301	P04083	annexin A1		178	0.498	0.828	1.4519e-07	0.2
Cerebral Infarction	NGB	58157	Q9NPG2	neuroglobin	transporter	30	0.681	0.31	0.0042421	0.06
Cerebral Infarction	BCL2	596	P10415	BCL2, apoptosis regulator	signaling molecule	987	0.312	0.862	0.56705	0.05
Cerebral Infarction	SOD1	6647	P00441	superoxide dismutase 1	oxidoreductase	456	0.406	0.931	0.12829	0.04
Cerebral Infarction	HSPB1	3315	P04792	heat shock protein family B (small) member 1		261	0.468	0.69	1.7685e-06	0.03
Cerebral Infarction	ROS1	6098	P08922	ROS proto-oncogene 1, receptor tyrosine kinase		165	0.493	0.759	1.5315e-69	0.03
Cerebral Infarction	HSPB3	8988	Q12988	heat shock protein family B (small) member 3		192	0.489	0.724	7.2376e-05	0.03
Cerebral Infarction	HSPB2	3316	Q16082	heat shock protein family B (small) member 2		158	0.507	0.69	0.00039905	0.03
Cerebral Infarction	CASP3	836	P42574	caspase 3	enzyme modulator; hydrolase; protease	462	0.391	0.862	0.28359	0.03
Cerebral Infarction	HIF1A	3091	Q16665	hypoxia inducible factor 1 subunit alpha	nucleic acid binding; transcription factor	586	0.367	0.793	0.97467	0.03
Cerebral Infarction	CCL5	6352	P13501	C-C motif chemokine ligand 5	signaling molecule	334	0.429	0.793	0.0016641	0.02
Cerebral Infarction	MBL2	4153	P11226	mannose binding lectin 2	receptor	367	0.415	0.828	0.014648	0.02
Cerebral Infarction	HGF	3082	P14210	hepatocyte growth factor	hydrolase; protease	478	0.394	0.793	0.99958	0.02
Cerebral Infarction	KLK4	9622	Q9Y5K2	kallikrein related peptidase 4	hydrolase; protease	74	0.588	0.586	3.422e-05	0.02
Cerebral Infarction	APP	351	P05067	amyloid beta precursor protein	enzyme modulator	371	0.43	0.862	0.062254	0.02
Cerebral Infarction	ALDH2	217	P05091	aldehyde dehydrogenase 2 family member	oxidoreductase	236	0.481	0.862	2.464e-09	0.02
Cerebral Infarction	CYBB	1536	P04839	cytochrome b-245 beta chain	oxidoreductase	187	0.503	0.793	0.99895	0.02
Cerebral Infarction	SETD2	29072	Q9BYW2	SET domain containing 2		297	0.465	0.724	1	0.02
Cerebral Infarction	SP1	6667	P08047	Sp1 transcription factor	nucleic acid binding; transcription factor	159	0.508	0.724	0.99998	0.02
Cerebral Infarction	TBXA2R	6915	P21731	thromboxane A2 receptor	receptor	47	0.627	0.552	9.7627e-05	0.02
Cerebral Infarction	PLA2G4A	5321	P47712	phospholipase A2 group IVA	hydrolase	118	0.538	0.655	8.5131e-05	0.02
Cerebral Infarction	TAT	6898	P17735	tyrosine aminotransferase		148	0.527	0.759	0.004723	0.01
Cerebral Infarction	SYP	6855	P08247	synaptophysin	membrane traffic protein	101	0.55	0.69	0.89923	0.01
Cerebral Infarction	CCL2	6347	P13500	C-C motif chemokine ligand 2	signaling molecule	691	0.353	0.897	0.61778	0.01
Cerebral Infarction	RIPK1	8737	Q13546	receptor interacting serine/threonine kinase 1		84	0.572	0.621	0.04076	0.01
Cerebral Infarction	CXCL12	6387	P48061	C-X-C motif chemokine ligand 12		350	0.421	0.724	0.12736	0.01
Cerebral Infarction	NRP1	8829	O14786	neuropilin 1		136	0.521	0.69	0.99702	0.01
Cerebral Infarction	STC1	6781	P52823	stanniocalcin 1	signaling molecule	83	0.575	0.621	0.1889	0.01
Cerebral Infarction	PROZ	8858	P22891	protein Z, vitamin K dependent plasma glycoprotein	hydrolase; protease	11	0.815	0.276	9.7896e-16	0.01
Cerebral Infarction	ARHGEF7	8874	Q14155	Rho guanine nucleotide exchange factor 7		116	0.533	0.724	0.99995	0.01
Cerebral Infarction	PIK3R3	8503	Q92569	phosphoinositide-3-kinase regulatory subunit 3	enzyme modulator	43	0.639	0.69	3.702e-10	0.01
Cerebral Infarction	SLC8A1	6546	P32418	solute carrier family 8 member A1		66	0.609	0.483	0.99605	0.01
Cerebral Infarction	TM7SF2	7108	O76062	transmembrane 7 superfamily member 2	oxidoreductase; receptor	103	0.55	0.69	6.6952e-07	0.01
Cerebral Infarction	SHH	6469	Q15465	sonic hedgehog		351	0.434	0.724	0.98502	0.01
Cerebral Infarction	SFTPD	6441	P35247	surfactant protein D	defense/immunity protein; surfactant	94	0.569	0.69	8.488e-05	0.01
Cerebral Infarction	UCP3	7352	P55916	uncoupling protein 3		43	0.652	0.414	1.0316e-09	0.01
Cerebral Infarction	CX3CL1	6376	P78423	C-X3-C motif chemokine ligand 1	signaling molecule	123	0.533	0.759	0.88477	0.01
Cerebral Infarction	CCL3	6348	P10147	C-C motif chemokine ligand 3	signaling molecule	133	0.522	0.828	0.36096	0.01
Cerebral Infarction	YWHAZ	7534	P63104	tyrosine 3-monooxygenase/tryptophan 5-monooxygenase activation protein zeta	chaperone	139	0.52	0.759	0.9479	0.01
Cerebral Infarction	TFPI	7035	P10646	tissue factor pathway inhibitor	enzyme modulator	161	0.507	0.759	0.25274	0.01
Cerebral Infarction	TGFBR2	7048	P37173	transforming growth factor beta receptor 2	kinase; receptor; transferase	361	0.437	0.793	0.14999	0.01
Cerebral Infarction	CBSL	102724560	P0DN79;P35520	cystathionine-beta-synthase like	hydrolase; isomerase; lyase	70	0.592	0.552		0.01
Cerebral Infarction	AKT1S1	84335	Q96B36	AKT1 substrate 1		27	0.676	0.345	0.31219	0.01
Cerebral Infarction	ZRANB3	84083	Q5FWF4	zinc finger RANBP2-type containing 3		5	0.857	0.448	5.444e-19	0.01
Cerebral Infarction	NDRG4	65009	Q9ULP0	NDRG family member 4	hydrolase; protease	10	0.799	0.207	0.01404	0.01
Cerebral Infarction	SRR	63826	Q9GZT4	serine racemase	hydrolase; isomerase; lyase	27	0.681	0.483	0.0063893	0.01
Cerebral Infarction	KIDINS220	57498	Q9ULH0	kinase D interacting substrate 220		92	0.579	0.655	0.05268	0.01
Cerebral Infarction	KIAA1147	57189	A4D1U4	KIAA1147		4	0.857	0.069	0.00029986	0.01
Cerebral Infarction	ERCC6L	54821	Q2NKX8	ERCC excision repair 6 like, spindle assembly checkpoint helicase		5	0.886	0.241	0.99934	0.01
Cerebral Infarction	ISYNA1	51477	Q9NPH2	inositol-3-phosphate synthase 1		95	0.548	0.69	2.8453e-05	0.01
Cerebral Infarction	GOLT1A	127845	Q6ZVE7	golgi transport 1A		7	0.799	0.172	0.1889	0.01
Cerebral Infarction	OR2AG1	144125	Q9H205	olfactory receptor family 2 subfamily AG member 1 (gene/pseudogene)		43	0.645	0.586	3.0998e-11	0.01
Cerebral Infarction	MIR491	574444		microRNA 491		30	0.659	0.448		0.01
Cerebral Infarction	MIR320A	407037		microRNA 320a		64	0.598	0.69		0.01
Cerebral Infarction	MIR210	406992		microRNA 210		156	0.501	0.759		0.01
Cerebral Infarction	MIR195	406971		microRNA 195		93	0.547	0.552		0.01
Cerebral Infarction	MIR130A	406919		microRNA 130a		81	0.57	0.69		0.01
Cerebral Infarction	PWAR4	347745		Prader Willi/Angelman region RNA 4		60	0.607	0.655		0.01
Cerebral Infarction	ZBTB7C	201501	A1YPR0	zinc finger and BTB domain containing 7C		31	0.676	0.448	0.43087	0.01
Cerebral Infarction	NRN1	51299	Q9NPD7	neuritin 1		14	0.762	0.172	0.86439	0.01
Cerebral Infarction	GOLT1B	51026	Q9Y3E0	golgi transport 1B		3	0.886	0.103	0.85313	0.01
Cerebral Infarction	ASCC1	51008	Q8N9N2	activating signal cointegrator 1 complex subunit 1		107	0.54	0.724	4.646e-15	0.01
Cerebral Infarction	AKR1A1	10327	P14550	aldo-keto reductase family 1 member A1	oxidoreductase	115	0.538	0.759	2.9154e-06	0.01
Cerebral Infarction	RAMP1	10267	O60894	receptor activity modifying protein 1	receptor	24	0.707	0.31	0.11926	0.01
Cerebral Infarction	RAMP2	10266	O60895	receptor activity modifying protein 2	receptor	35	0.663	0.517	0.0481	0.01
Cerebral Infarction	DCAF7	10238	P61962	DDB1 and CUL4 associated factor 7		35	0.667	0.517	0.93792	0.01
Cerebral Infarction	ANGPTL1	9068	O95841	angiopoietin like 1	signaling molecule	30	0.685	0.414	9.7727e-11	0.01
Cerebral Infarction	SEMA3A	10371	Q14563	semaphorin 3A	signaling molecule	73	0.604	0.655	0.98279	0.01
Cerebral Infarction	GPNMB	10457	Q14956	glycoprotein nmb	cell adhesion molecule; signaling molecule	102	0.55	0.586	3.0945e-27	0.01
Cerebral Infarction	SLC9A6	10479	Q92581	solute carrier family 9 member A6		157	0.559	0.69	0.99799	0.01
Cerebral Infarction	IL22	50616	Q9GZX6	interleukin 22		231	0.464	0.793	0.00019005	0.01
Cerebral Infarction	HTRA2	27429	O43464	HtrA serine peptidase 2	chaperone; hydrolase; protease	90	0.582	0.448	0.0037425	0.01
Cerebral Infarction	IL17C	27189	Q9P0M4	interleukin 17C		108	0.537	0.759	0.00013235	0.01
Cerebral Infarction	PHGDH	26227	O43175	phosphoglycerate dehydrogenase	oxidoreductase	198	0.532	0.759	0.0001261	0.01
Cerebral Infarction	PART1	25859		prostate androgen-regulated transcript 1		33	0.676	0.448		0.01
Cerebral Infarction	BACE1	23621	P56817	beta-secretase 1	hydrolase; protease	56	0.616	0.517	0.87664	0.01
Cerebral Infarction	RPL13A	23521	P40429	ribosomal protein L13a	nucleic acid binding	8	0.785	0.207	0.80148	0.01
Cerebral Infarction	TNFRSF13B	23495	O14836	TNF receptor superfamily member 13B		118	0.572	0.724	1.8981e-15	0.01
Cerebral Infarction	SIRT1	23411	Q96EB6	sirtuin 1	hydrolase; nucleic acid binding	325	0.432	0.828	0.081958	0.01
Cerebral Infarction	RIPK3	11035	Q9Y572	receptor interacting serine/threonine kinase 3		70	0.586	0.586	1.1713e-14	0.01
Cerebral Infarction	EBP	10682	Q15125	EBP, cholestenol delta-isomerase	isomerase	193	0.512	0.793	0.94415	0.01
Cerebral Infarction	KAT5	10524	Q92993	lysine acetyltransferase 5	nucleic acid binding; transcription factor; transferase	83	0.573	0.621	0.31958	0.01
Cerebral Infarction	F2RL3	9002	Q96RI0	F2R like thrombin or trypsin receptor 3		80	0.573	0.69	0.0017481	0.01
Cerebral Infarction	EMP1	2012	P54849	epithelial membrane protein 1	cytoskeletal protein	45	0.633	0.414	0.49276	0.01
Cerebral Infarction	HBEGF	1839	Q99075	heparin binding EGF like growth factor	signaling molecule	102	0.545	0.552	0.080372	0.01
Cerebral Infarction	DSCAM	1826	O60469	DS cell adhesion molecule	transmembrane receptor regulatory/adaptor protein	32	0.707	0.276	1	0.01
Cerebral Infarction	DLG4	1742	P78352	discs large MAGUK scaffold protein 4	transmembrane receptor regulatory/adaptor protein	44	0.648	0.448	0.99981	0.01
Cerebral Infarction	DECR1	1666	Q16698	2,4-dienoyl-CoA reductase 1	oxidoreductase	213	0.472	0.759	5.9544e-13	0.01
Cerebral Infarction	DCR	1637		Down syndrome chromosome region		9	0.785	0.31		0.01
Cerebral Infarction	CYP3A4	1576	P08684	cytochrome P450 family 3 subfamily A member 4	oxidoreductase	178	0.492	0.793	5.3676e-11	0.01
Cerebral Infarction	CTSG	1511	P08311	cathepsin G	hydrolase; protease	38	0.656	0.517	7.8185e-06	0.01
Cerebral Infarction	CSF2	1437	P04141	colony stimulating factor 2	signaling molecule	670	0.356	0.966	0.84256	0.01
Cerebral Infarction	GRN	2896	P28799	granulin precursor		251	0.476	0.724	0.053281	0.01
Cerebral Infarction	GOT1	2805	P17174	glutamic-oxaloacetic transaminase 1		32	0.672	0.517	0.0013446	0.01
Cerebral Infarction	GFAP	2670	P14136	glial fibrillary acidic protein		220	0.484	0.759	1.1684e-06	0.01
Cerebral Infarction	GDNF	2668	P39905	glial cell derived neurotrophic factor	signaling molecule	264	0.463	0.759	0.19663	0.01
Cerebral Infarction	GABPA	2551	Q06546	GA binding protein transcription factor subunit alpha	nucleic acid binding; signaling molecule; transcription factor	262	0.454	0.828	0.99791	0.01
Cerebral Infarction	FOSB	2354	P53539	FosB proto-oncogene, AP-1 transcription factor subunit	transcription factor	158	0.504	0.759	0.95196	0.01
Cerebral Infarction	FOS	2353	P01100	Fos proto-oncogene, AP-1 transcription factor subunit	transcription factor	350	0.436	0.862	0.23302	0.01
Cerebral Infarction	FABP2	2169	P12104	fatty acid binding protein 2		44	0.645	0.414	0.0054053	0.01
Cerebral Infarction	FABP1	2168	P07148	fatty acid binding protein 1		29	0.676	0.448	1.0318e-06	0.01
Cerebral Infarction	MAPK14	1432	Q16539	mitogen-activated protein kinase 14	kinase; transferase	270	0.449	0.862	0.77511	0.01
Cerebral Infarction	CALM2	805	P0DP23;P0DP24;P0DP25	calmodulin 2		198	0.472	0.793	0.92487	0.01
Cerebral Infarction	CALM1	801	P0DP23;P0DP24;P0DP25	calmodulin 1		203	0.469	0.793	0.94658	0.01
Cerebral Infarction	BSG	682	P35613	basigin (Ok blood group)	transmembrane receptor regulatory/adaptor protein	167	0.5	0.759	0.00013473	0.01
Cerebral Infarction	BMP7	655	P18075	bone morphogenetic protein 7	signaling molecule	121	0.535	0.655	0.39786	0.01
Cerebral Infarction	ADGRB2	576	O60241	adhesion G protein-coupled receptor B2	defense/immunity protein; hydrolase; protease; receptor	4	0.928	0.069		0.01
Cerebral Infarction	APRT	353	P07741	adenine phosphoribosyltransferase		255	0.453	0.724	2.5437e-11	0.01
Cerebral Infarction	PARP1	142	P09874	poly(ADP-ribose) polymerase 1		312	0.432	0.862	0.00055174	0.01
Cerebral Infarction	CALM3	808	P0DP23;P0DP24;P0DP25	calmodulin 3		182	0.479	0.793	0.922	0.01
Cerebral Infarction	CAPN1	823	P07384	calpain 1	calcium-binding protein; hydrolase; protease	52	0.627	0.621	3.143e-10	0.01
Cerebral Infarction	CREB1	1385	P16220	cAMP responsive element binding protein 1		187	0.494	0.793	0.99621	0.01
Cerebral Infarction	COL11A2	1302	P13942	collagen type XI alpha 2 chain		281	0.478	0.69	0.41511	0.01
Cerebral Infarction	CDK4	1019	P11802	cyclin dependent kinase 4	kinase; transferase	266	0.449	0.724	0.077882	0.01
Cerebral Infarction	CDC42	998	P60953	cell division cycle 42	enzyme modulator	155	0.511	0.828	0.80671	0.01
Cerebral Infarction	ENTPD1	953	P49961	ectonucleoside triphosphate diphosphohydrolase 1	hydrolase; phosphatase	101	0.569	0.655	0.0061762	0.01
Cerebral Infarction	SCARB1	949	Q8WTV0	scavenger receptor class B member 1	receptor	82	0.584	0.621	0.064875	0.01
Cerebral Infarction	CD14	929	P08571	CD14 molecule		328	0.429	0.828	6.0159e-05	0.01
Cerebral Infarction	CCNH	902	P51946	cyclin H	enzyme modulator; nucleic acid binding; transcription factor	44	0.648	0.517	0.0008061	0.01
Cerebral Infarction	CBS	875	P0DN79;P35520	cystathionine-beta-synthase	hydrolase; isomerase; lyase	197	0.503	0.793	2.8287e-05	0.01
Cerebral Infarction	CASP6	839	P55212	caspase 6	enzyme modulator; hydrolase; protease	34	0.676	0.448	0.00011311	0.01
Cerebral Infarction	ADAM10	102	O14672	ADAM metallopeptidase domain 10		105	0.552	0.724	1	0.01
Cerebral Infarction	NR3C1	2908	P04150	nuclear receptor subfamily 3 group C member 1	nucleic acid binding; receptor; transcription factor	349	0.427	0.793	0.97882	0.01
Cerebral Infarction	RAC1	5879	P63000	Rac family small GTPase 1	enzyme modulator	226	0.47	0.931	0.70654	0.01
Cerebral Infarction	SERPINB6	5269	P35237	serpin family B member 6	enzyme modulator	50	0.621	0.655	6.2896e-05	0.01
Cerebral Infarction	PAWR	5074	Q96IZ0	pro-apoptotic WT1 regulator		91	0.562	0.759	0.089642	0.01
Cerebral Infarction	ITGAL	3683	P20701	integrin subunit alpha L		102	0.547	0.793	0.004967	0.01
Cerebral Infarction	P2RY2	5029	P41231	purinergic receptor P2Y2		61	0.609	0.586	0.089984	0.01
Cerebral Infarction	ODC1	4953	P11926	ornithine decarboxylase 1	lyase	127	0.532	0.759	0.18534	0.01
Cerebral Infarction	NPR2	4882	P20594	natriuretic peptide receptor 2	lyase	97	0.624	0.552	0.00014769	0.01
Cerebral Infarction	NOS2	4843	P35228	nitric oxide synthase 2		531	0.385	0.931	1.4648e-14	0.01
Cerebral Infarction	PIK3CA	5290	P42336	phosphatidylinositol-4,5-bisphosphate 3-kinase catalytic subunit alpha	kinase; transferase	835	0.341	0.897	1	0.01
Cerebral Infarction	PIK3CB	5291	P42338	phosphatidylinositol-4,5-bisphosphate 3-kinase catalytic subunit beta	kinase; transferase	468	0.389	0.862	0.99993	0.01
Cerebral Infarction	PTGER1	5731	P34995	prostaglandin E receptor 1	receptor	39	0.676	0.414	0.005131	0.01
Cerebral Infarction	PSEN1	5663	P49768	presenilin 1	calcium-binding protein; hydrolase; protease; signaling molecule	268	0.49	0.69	0.97833	0.01
Cerebral Infarction	PSPN	5623	O60542	persephin	signaling molecule	12	0.743	0.379	9.2552e-05	0.01
Cerebral Infarction	MAP2K7	5609	O14733	mitogen-activated protein kinase kinase 7		231	0.462	0.759	0.99908	0.01
Cerebral Infarction	PRKG1	5592	Q13976	protein kinase cGMP-dependent 1		94	0.575	0.724	0.9999	0.01
Cerebral Infarction	POU5F1	5460	Q01860	POU class 5 homeobox 1		186	0.485	0.69	0.98254	0.01
Cerebral Infarction	PLSCR1	5359	O15162	phospholipid scramblase 1	transfer/carrier protein	16	0.72	0.448	0.045986	0.01
Cerebral Infarction	PIK3CG	5294	P48736	phosphatidylinositol-4,5-bisphosphate 3-kinase catalytic subunit gamma	kinase; transferase	490	0.385	0.862	1.4942e-06	0.01
Cerebral Infarction	PIK3CD	5293	O00329	phosphatidylinositol-4,5-bisphosphate 3-kinase catalytic subunit delta	kinase; transferase	487	0.386	0.862	0.99999	0.01
Cerebral Infarction	NFKB1	4790	P19838	nuclear factor kappa B subunit 1		611	0.365	0.931	1	0.01
Cerebral Infarction	NFE2L2	4780	Q16236	nuclear factor, erythroid 2 like 2	cytoskeletal protein; hydrolase; nucleic acid binding; transcription factor	376	0.42	0.862	0.0035489	0.01
Cerebral Infarction	JUNB	3726	P17275	JunB proto-oncogene, AP-1 transcription factor subunit	nucleic acid binding; transcription factor	169	0.491	0.69	0.85964	0.01
Cerebral Infarction	JUN	3725	P05412	Jun proto-oncogene, AP-1 transcription factor subunit	nucleic acid binding; transcription factor	213	0.473	0.828	0.64845	0.01
Cerebral Infarction	IRAK1	3654	P51617	interleukin 1 receptor associated kinase 1		74	0.573	0.655	0.98866	0.01
Cerebral Infarction	HP	3240	P00738	haptoglobin	hydrolase; protease	228	0.461	0.793	7.4325e-05	0.01
Cerebral Infarction	TLX2	3196	O43763	T cell leukemia homeobox 2		24	0.72	0.414	0.25881	0.01
Cerebral Infarction	JUND	3727	P17535	JunD proto-oncogene, AP-1 transcription factor subunit	nucleic acid binding; transcription factor	141	0.514	0.724	0.70581	0.01
Cerebral Infarction	MAP3K11	4296	Q16584	mitogen-activated protein kinase kinase kinase 11		40	0.663	0.483	0.0089262	0.01
Cerebral Infarction	MDK	4192	P21741	midkine	signaling molecule	139	0.524	0.655	0.2219	0.01
Cerebral Infarction	MBP	4155	P02686	myelin basic protein		107	0.542	0.793	0.30405	0.01
Cerebral Infarction	LMO1	4004	P25800	LIM domain only 1		31	0.685	0.276	0.64153	0.01
Cerebral Infarction	LIMK1	3984	P53667	LIM domain kinase 1		188	0.552	0.621	0.99926	0.01
Cerebral Infarction	LCAT	3931	P04180	lecithin-cholesterol acyltransferase	hydrolase; transferase	56	0.639	0.448	0.079871	0.01
Cerebral Infarction	KCNK3	3777	O14649	potassium two pore domain channel subfamily K member 3		37	0.663	0.276	0.89353	0.01
Cerebral Infarction	H2AFX	3014	P16104	H2A histone family member X	nucleic acid binding	139	0.511	0.69	0.17304	0.01
